# Supplementary material
Source: ML conference proceedings conference paper supplement (https://openreview.net/forum?id=rdp1dLxyMI)
Supplement: supplementary_material [file joint-rss-neurips25-with-appendix-v-final.pdf › jrs-supplementary-material/joint-rss-neurips25-with-appendix-v-final.pdf]

---

# Shortcuts and Identifiability in Concept-based Models from a Neuro-Symbolic Lens

---

Anonymous Author(s)

Affiliation

Address

email

## Abstract

1 Concept-based Models are neural networks that learn a concept extractor to map  
2 inputs to high-level *concepts* and an *inference layer* to translate these into predic-  
3 tions. Ensuring these modules produce interpretable concepts and behave reliably  
4 in out-of-distribution is crucial, yet the conditions for achieving this remain un-  
5 clear. We study this problem by establishing a novel connection between Concept-  
6 based Models and *reasoning shortcuts* (RSs), a common issue where models  
7 achieve high accuracy by learning low-quality concepts, even when the inference  
8 layer is *fixed* and provided upfront. Specifically, we extend RSs to the more com-  
9 plex setting of Concept-based Models and derive theoretical conditions for iden-  
10 tifying both the concepts and the inference layer. Our empirical results highlight  
11 the impact of RSs and show that existing methods, even combined with multiple  
12 natural mitigation strategies, often fail to meet these conditions in practice.

## 13 1 Introduction

14 Concept-based Models (CBMs) are a broad class of self-explainable classifiers [1, 2, 3, 4, 5] de-  
15 signed for high performance and *ante-hoc* interpretability. Learning a CBM involves solving two  
16 conjoint problems: acquiring high-level *concepts* describing the input (e.g., an image) and an *in-*  
17 *ference layer* that predicts a label from them. In many applications, it is essential that these two  
18 elements are “high quality”, in the sense that: *i*) the concepts should be *interpretable*, as failure in  
19 doing so compromises understanding [6, 7] and steerability [8, 9], both key selling points of CBMs;  
20 and *ii*) the concepts and inference layer should behave well also *out of distribution* (OOD), e.g., they  
21 should not pick up spurious correlations between the input, the concepts and the output [10, 11, 12].

22 This raises the question of when CBMs can acquire “high-quality” concepts and inference layers.  
23 While existing studies focus on concept quality [13, 14, 15], they neglect the role of the inference  
24 layer altogether. In contrast, we cast the question in terms of whether it is possible to *identify* from  
25 data concepts and inference layers with the intended semantics, defined formally in Section 3.1. We  
26 proceed to answer this question by building a novel connection with *reasoning shortcuts* (RSs), a  
27 well-known issue in Neuro-Symbolic (NeSy) AI whereby models achieve high accuracy by learning  
28 low-quality concepts *even if the inference layer is fixed* [16, 17, 18, 19]. For instance, a NeSy model  
29 for autonomous driving whose inference layer encodes the traffic laws might confuse pedestrians  
30 with red lights, as both entail the same prediction (the car has to stop) [20].

31 We generalize RSs to CBMs in which *the inference layer is learned*, and concept supervision may be  
32 absent. Our analysis shows that shortcuts can be exponentially many, even more than RSs, (we count  
33 them explicitly in Appendix B.5) and that maximum likelihood training is insufficient for attaining  
34 intended semantics. This hinders both interpretability and OOD behavior. On the positive side, we  
35 also specify conditions under which (under suitable assumptions) CBMs *cannot* be fooled by RSs,  
36 proving that *the ground-truth concepts and inference layer can be identified* (see Theorem 3.9).

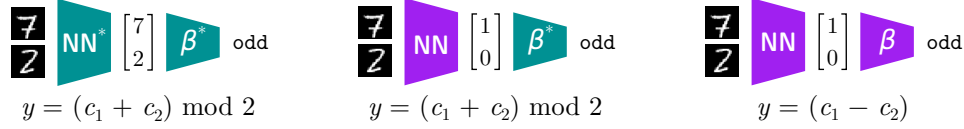

Figure 1: **Joint reasoning shortcuts.** The goal is to predict whether the sum of two MNIST digits is odd (as in [Example 2.1](#)) from a training set of all possible unique (even, even), (odd, odd), and (odd, even) pairs of MNIST digits. **Green** elements are fixed, **purple** ones are learned. **Left:** ground-truth concepts and inference layer. **Middle:** NeSy-CBMs with given knowledge can learn reasoning shortcuts, i.e., concepts with unintended semantics. **Right:** CBMs can learn joint reasoning shortcuts, i.e., both concepts and inference layer have unintended semantics.

Our evaluation on several learning tasks suggest that CBMs can be severely impacted by reasoning shortcuts in practice, as expected, and also that the benefits of popular mitigation strategies do not carry over to this more challenging problem. These results cast doubts on the ability of these models to identify concepts and inference layers with the intended semantics unless appropriately nudged.

**Contributions:** In summary, we: (i) generalize reasoning shortcuts to the challenging case of CBMs whose inference layer is learned ([Section 3.1](#)), (ii) study conditions under which maximum likelihood training can identify good concepts and inference layers ([Section 3.2](#)), and (iii) present empirical evidence that proven mitigations fail in this challenging setting ([Section 5](#)).

## 2 Preliminaries

**Concept-based Models (CBMs)** first map the input  $\mathbf{x} \in \mathbb{R}^n$  into  $k$  discrete concepts  $\mathbf{c} = (c_1, \dots, c_k) \in \mathcal{C}$  via a neural backbone, and then infer labels  $\mathbf{y} \in \mathcal{Y}$  from this using a white-box layer, e.g., a linear layer. This setup makes it easy to figure out what concepts are most responsible for any prediction, yielding a form of *ante-hoc* concept-based interpretability. Several architectures follow this recipe, including approaches for converting black-box neural networks into CBMs [[21](#), [22](#), [23](#), [24](#)].

A key issue is how to ensure the concepts are interpretable. Some CBMs rely on *concept annotations* [[2](#), [25](#), [3](#), [4](#), [26](#), [27](#)]. These are however expensive to obtain, prompting researchers to replace them with (potentially unreliable [[28](#), [29](#)]) annotations obtained from foundation models [[30](#), [31](#), [32](#), [33](#)] or *unsupervised* concept discovery [[1](#), [34](#), [5](#), [35](#)].

**Neuro-Symbolic CBMs (NeSy-CBMs)** specialize CBMs to tasks in which the prediction  $\mathbf{y} \in \mathcal{Y}$  ought to comply with known safety or structural constraints. These are supplied as a formal specification – a logic formula  $K$ , *aka knowledge* – tying together the prediction  $\mathbf{y}$  and the concepts  $\mathbf{c}$ . In NeSy-CBMs, the inference step is a *symbolic reasoning layer* that steers [[36](#), [37](#), [38](#)] or guarantees [[39](#), [40](#), [41](#), [42](#), [43](#)] the labels and concepts to be logically consistent according to  $K$ . Throughout, we will consider this example task:

**Example 2.1 (MNIST-SumParity).** *Given two MNIST digits [[44](#)], we wish to predict whether their sum is even or odd. The numerical values of the two digits can be modelled as concepts  $\mathbf{C} \in \{0, \dots, 9\}^2$ , and the inference layer is entirely determined by the prior knowledge:  $K = ((y = 1) \Leftrightarrow (C_1 + C_2) \text{ is odd})$ . This specifies that the label  $y \in \{0, 1\}$  ought to be consistent with the predicted concepts  $\mathbf{C}$ . See [Fig. 1](#) for an illustration.*

Like CBMs, NeSy-CBMs are usually trained via *maximum likelihood* and gradient descent, but without concept supervision. The reasoning layer is typically imbued with fuzzy [[45](#)] or probabilistic [[46](#)] logic semantics to ensure differentiability. Many NeSy-CBMs require  $K$  to be provided upfront, as in [Example 2.1](#), hence their inference layer has no learnable parameters. Starting with [Section 3](#), we will instead consider NeSy-CBMs that – just like regular CBMs – *learn the inference layer* [[47](#), [48](#), [49](#), [50](#), [51](#)].

### 2.1 Reasoning Shortcuts

Before discussing reasoning shortcuts, we need to establish a clear relationship between concepts, inputs, and labels. The RS literature does so by assuming the following *data generation process* [[17](#),

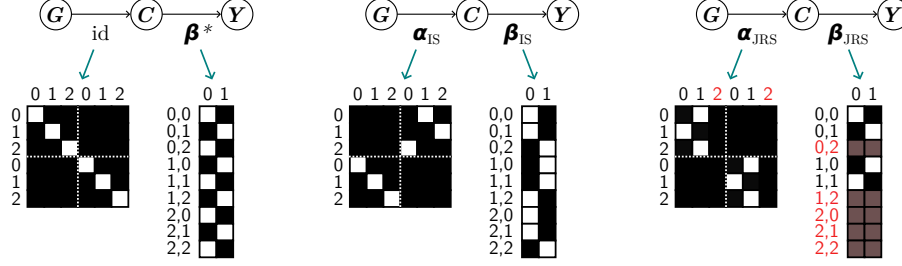

Figure 2: **Examples of semantics in MNIST-SumParity** restricted to  $\mathbf{g}, \mathbf{c} \in \{0, 1, 2\}^2$  for readability. **Left:** ideally,  $\alpha$  should be the identity (i.e.,  $\mathbf{C}$  recovers the ground-truth concepts  $\mathbf{G}$ ) and the inference layer should learn  $\beta^*$ . **Middle:**  $(\alpha_{\text{IS}}, \beta_{\text{IS}}) \neq (\text{id}, \beta^*)$  has intended semantics (Definition 3.3), i.e., the ground-truth concepts and inference layer can be recovered and generalize OOD. **Right:**  $(\alpha_{\text{JRS}}, \beta_{\text{JRS}})$  affected by the JRS in Fig. 1. Elements (predicted concepts  $\mathbf{C}$  and entries in  $\beta$ ) in red are never predicted nor used, highlighting *simplicity bias*. Maps are visualized as matrices.

19, 52]: each input  $\mathbf{x} \in \mathbb{R}^n$  is the result of sampling  $k$  **ground-truth concepts**  $\mathbf{g} = (g_1, \dots, g_k) \in \mathcal{G}$  (e.g., in MNIST-SumParity two numerical digits) from an unobserved distribution  $p^*(\mathbf{G})$  and then  $\mathbf{x}$  itself (e.g., two corresponding MNIST images) from the conditional distribution  $p^*(\mathbf{X} | \mathbf{g})$ .<sup>1</sup> Labels  $\mathbf{y} \in \mathcal{Y}$  are sampled from the conditional distribution of  $\mathbf{g}$  given by  $p^*(\mathbf{Y} | \mathbf{g}; \mathbf{K})$  consistently with  $\mathbf{K}$  (e.g.,  $y = 1$  if and only if  $g_1 + g_2$  is odd). The ground-truth distribution is thus:

$$p^*(\mathbf{X}, \mathbf{Y}) = \mathbb{E}_{\mathbf{g} \sim p^*(\mathbf{G})} [p^*(\mathbf{X} | \mathbf{g}) p^*(\mathbf{Y} | \mathbf{g}; \mathbf{K})] \quad (1)$$

Intuitively, a **reasoning shortcut** (RS) occurs when a NeSy-CBM with *fixed* knowledge  $\mathbf{K}$  attains high or even perfect label accuracy by learning concepts  $\mathbf{C}$  that differ from the ground-truth ones  $\mathbf{G}$  [17]. As commonly done, we work in the setting where  $\mathcal{G} = \mathcal{C}$ .

**Example 2.2.** In MNIST-SumParity, a NeSy model can achieve perfect accuracy by mapping each pair of MNIST images  $\mathbf{x} = (\mathbf{x}_1, \mathbf{x}_2)$  to the corresponding ground-truth digits, that is,  $\mathbf{c} = (g_1, g_2)$ . However, it would achieve the same accuracy if it were to map it to  $\mathbf{c} = (g_1 \bmod 2, g_2 \bmod 2)$ , as doing so leaves the parity of the sum unchanged, see Fig. 1. Hence, a NeSy model cannot distinguish between the two based on label likelihood alone during training.

RSs by definition yield good labels in-distribution, yet they compromise out-of-distribution (OOD) performance. For instance, in autonomous driving tasks, NeSy-CBMs can confuse the concepts of “pedestrian” and “red light”, leading to poor decisions for OOD decisions where the distinction matters [20]. The meaning of concepts affected by RSs is unclear, affecting understanding [6], intervenability [53, 54, 55], debugging [56, 12] and down-stream applications that hinge on concepts being high-quality, like NeSy formal verification [57, 58, 59]. Unfortunately, existing works on RSs do not apply to CBMs and NeSy-CBMs where the inference layer is learned.

### 3 Reasoning Shortcuts in CBMs

Given a finite set  $\mathcal{S}$ , we indicate with  $\Delta_{\mathcal{S}} \subset [0, 1]^{|\mathcal{S}|}$  the simplex of probability distributions  $P(\mathcal{S})$  over items in  $\mathcal{S}$ . Notice that the set of its vertices  $\text{Vert}(\Delta_{\mathcal{S}})$  contains all point mass distributions  $\mathbb{1}\{S = s\}$  for all  $s \in \mathcal{S}$ .

**CBMs as pairs of functions.** CBMs and NeSy-CBMs differ in how they implement the inference layer, hence to bridge them we employ the following unified formalism. Any CBM can be viewed as a pair of learnable functions implementing the concept extractor and the inference layer, respectively, cf. Fig. 2. Formally, the former is a function  $\mathbf{f} : \mathbb{R}^n \rightarrow \Delta_{\mathcal{C}}$  mapping inputs  $\mathbf{x}$  to a conditional distribution  $p(\mathbf{C} | \mathbf{x})$  over the concepts, however it can be better understood as a function  $\alpha : \mathcal{G} \rightarrow \Delta_{\mathcal{C}}$  taking ground-truth concepts  $\mathbf{g}$  as input instead, and defined as:

$$\alpha(\mathbf{g}) := \mathbb{E}_{\mathbf{x} \sim p^*(\mathbf{x} | \mathbf{g})} [\mathbf{f}(\mathbf{x})] \quad (2)$$

In contrast, the inference layer is a function  $\omega : \Delta_{\mathcal{C}} \rightarrow \Delta_{\mathcal{Y}}$  mapping the concept distribution output by the concept extractor into a label distribution  $p(\mathbf{Y} | \mathbf{f}(\mathbf{x}))$ . For clarity, we also define

<sup>1</sup>This distribution subsumes stylistic factors, e.g., calligraphy.

108  $\beta : \mathcal{C} \rightarrow \Delta_{\mathcal{Y}}$ , which is identical to the former except it works with concept *values* rather than  
 109 *distributions*, that is:

$$\beta(\mathbf{c}) := \omega(\mathbb{1}\{\mathbf{C} = \mathbf{c}\}) \quad (3)$$

110 Hence, a CBM entails both a pair  $(\mathbf{f}, \omega) \in \mathcal{F} \times \Omega$  and a pair  $(\alpha, \beta) \in \mathcal{A} \times \mathcal{B}$ .<sup>2</sup> Later on, we will  
 111 make use of the fact that  $\mathcal{A}$  and  $\mathcal{B}$  are *simplices* [60, 61], i.e., each  $\alpha \in \mathcal{A}$  (resp.  $\beta \in \mathcal{B}$ ) can be  
 112 written as a convex combination of vertices  $\text{Vert}(\mathcal{A})$  (resp.  $\text{Vert}(\mathcal{B})$ ).

113 As mentioned in Section 2, supplying prior knowledge  $\mathbf{K}$  to a NeSy-CBM is equivalent to *fixing the*  
 114 *inference layer* to a corresponding function  $\omega^*$  (and  $\beta^*$ ). Note that whereas  $\omega^*$  changes based on  
 115 how reasoning is implemented – e.g., fuzzy vs. probabilistic logic –  $\beta^*$  does not, as both kinds of  
 116 reasoning layers behave identically when input any point-mass concept distribution  $\mathbb{1}\{\mathbf{C} = \mathbf{c}\}$ .

117 **Standard assumptions.** The maps  $\alpha$  and  $\beta$  are especially useful for analysis provided the following  
 118 two standard assumptions about how data are distributed [17, 19, 52]:

119 **Assumption 3.1** (Invertibility). *The ground-truth distribution  $p^*(\mathbf{G} \mid \mathbf{X})$  is induced by a function*  
 120  *$\mathbf{f}^* : \mathbf{x} \mapsto \mathbf{g}$ , i.e.,  $p^*(\mathbf{G} \mid \mathbf{X}) = \mathbb{1}\{\mathbf{G} = \mathbf{f}^*(\mathbf{X})\}$ .*

121 This means that the ground-truth concepts  $\mathbf{g}$  can always be recovered for all inputs  $\mathbf{x}$  by a sufficiently  
 122 expressive concept extractor; the  $\alpha$  it induces is the identity  $\text{id}(\mathbf{g}) := \mathbb{1}\{\mathbf{C} = \mathbf{g}\} \in \text{Vert}(\mathcal{A})$ .

123 **Assumption 3.2** (Deterministic knowledge). *The ground-truth distribution  $p^*(\mathbf{Y} \mid \mathbf{G}; \mathbf{K})$  is induced*  
 124 *by the knowledge via a map  $\beta^* \in \text{Vert}(\mathcal{B})$ , such that  $p^*(\mathbf{Y} \mid \mathbf{G}; \mathbf{K}) = \beta^*(\mathbf{g})$ .*

125 This ensures that the labels  $\mathbf{y}$  can be predicted without any ambiguity from the ground-truth concepts  
 126  $\mathbf{g}$ . Both assumptions apply in several tasks, see [20]. The maximum log-likelihood objective is then  
 127 written as:

$$\max_{(\mathbf{f}, \omega) \in \mathcal{F} \times \Omega} \mathbb{E}_{(\mathbf{x}, \mathbf{y}) \sim p^*(\mathbf{X}, \mathbf{Y})} \log(\omega_{\mathbf{y}} \circ \mathbf{f})(\mathbf{x}) \quad (4)$$

128 Here,  $\omega_{\mathbf{y}}$  is the conditional probability of the ground-truth labels  $\mathbf{y}$ . Notice that under the above  
 129 assumptions CBMs attaining maximum likelihood perfectly model the ground-truth data distribution  
 130  $p^*(\mathbf{X}, \mathbf{Y})$ , see Lemma C.1.

### 131 3.1 Intended Semantics and Joint Reasoning Shortcuts

132 We posit that a CBM  $(\alpha, \beta) \in \mathcal{A} \times \mathcal{B}$  has “high-quality” concepts and inference layer if it satisfies  
 133 two desiderata: (i) **disentanglement**: each learned concept  $C_i$  should correspond to a single ground-  
 134 truth concept  $G_j$  up to an invertible transformation; (ii) **generalization**: the combination of  $\alpha$  and  
 135  $\beta$  must always yield correct predictions.

136 In our setting, without concept supervision and prior knowledge, the learned concepts are *anony-*  
 137 *mous* and users have to figure out which is which in a *post-hoc* fashion, e.g., by aligning them to  
 138 dense annotations [2, 3, 49, 50]. Doing so is also a prerequisite for understanding the learned in-  
 139 ference layer [51, 49, 3, 54]. When *disentanglement* holds the mapping between  $\mathbf{G}$  and  $\mathbf{C}$  can be  
 140 recovered *exactly* using Hungarian matching [62]; otherwise it is arbitrarily difficult to recover, hin-  
 141 dering interpretability. This links CBMs with many works that treat model representations’ *identifi-*  
 142 *ability* in Independent Component Analysis and Causal Representation Learning [63, 64, 65, 66, 67],  
 143 where disentanglement plays a central role. **Generalization** is equally important, as it entails that  
 144 CBMs generalize beyond the support of training data and yields sensible OOD behavior, i.e., output  
 145 the same predictions that would be obtained by using the ground-truth pair. Since we want  $\alpha$  to be  
 146 disentangled, this implies, in turn, a specific form for the map  $\beta$ , as shown by the next definition,  
 147 which formalizes these desiderata:

148 **Definition 3.3** (Intended Semantics). *A CBM  $(\mathbf{f}, \omega) \in \mathcal{F} \times \Omega$  entailing a pair  $(\alpha, \beta) \in \mathcal{A} \times \mathcal{B}$*   
 149 *possesses the intended semantics if there exists a permutation  $\pi : [k] \rightarrow [k]$  and  $k$  element-wise*  
 150 *invertible functions  $\psi_1, \dots, \psi_k$  such that:*

$$\alpha(\mathbf{g}) = (\psi \circ \mathbf{P}_{\pi} \circ \text{id})(\mathbf{g}) \quad \beta(\mathbf{c}) = (\beta^* \circ \mathbf{P}_{\pi}^{-1} \circ \psi^{-1})(\mathbf{c}) \quad (5)$$

151 Here,  $\mathbf{P}_{\pi} : \mathcal{C} \rightarrow \mathcal{C}$  is the permutation matrix induced by  $\pi$  and  $\psi(\mathbf{c}) := (\psi_1(c_1), \dots, \psi_k(c_k))$ . In  
 152 this case, we say that  $(\alpha, \beta)$  is equivalent to  $(\text{id}, \beta^*)$ , i.e.,  $(\alpha, \beta) \sim (\text{id}, \beta^*)$

<sup>2</sup>We work in the non-parametric setting, hence  $\mathcal{F}$  and  $\Omega$  contain all learnable concept extractors  $\mathbf{f}$  and  
 inference layers  $\omega$ , and similarly  $\mathcal{A}$  and  $\mathcal{B}$  contain all learnable maps  $\alpha$  and  $\beta$ .

Intended semantics holds if the learned concepts  $\mathbf{C}$  match the ground-truth concepts  $\mathbf{G}$  modulo simple invertible transformations – like reordering and negation (Eq. (5), left) – and the inference layer *undoes* these transformations before applying the “right” inference layer  $\beta^*$  (Eq. (5), right). This also means that CBMs satisfying them are *equivalent* – in a very precise sense – to the ground-truth pair  $(\text{id}, \beta^*)$ , see Fig. 2 middle for an example. A similar equivalence relation was analyzed for continuous representations in energy-based models, including supervised classifiers, by Khemakhem et al. [63]. In Lemma C.4, we prove that models with the intended semantics yield the same predictions of the ground-truth pair for all  $\mathbf{g} \in \mathcal{G}$ .

Training a (NeSy) CBM via maximum likelihood does not guarantee it will embody intended semantics. We denote these failure cases as *joint reasoning shortcuts* (JRSs):

**Definition 3.4** (Joint Reasoning Shortcut). *Take a CBM  $(\mathbf{f}, \omega) \in \mathcal{F} \times \Omega$  that attains optimal log-likelihood (Eq. (4)). The pair  $(\alpha, \beta)$  entailed by it (Eqs. (2) and (3)) is a JRS if it does not possess the intended semantics (Definition 3.3), i.e.,  $(\alpha, \beta) \not\sim (\text{id}, \beta^*)$ .*

JRSs can take different forms. First, even if the learned inference layer  $\beta$  matches (modulo  $\mathbf{P}_\pi$  and  $\psi$ ) the ground-truth one  $\beta^*$ ,  $\alpha$  might not match (also modulo  $\mathbf{P}_\pi$  and  $\psi$ ) the identity. This is analogous to regular RSs in NeSy CBMs (Section 2), in that the learned concepts do not reflect the ground-truth ones: while this is sufficient for high in-distribution performance (the training likelihood is in fact optimal), it may yield poor OOD behavior. Second, even if  $\alpha$  matches the identity, the inference layer  $\beta$  might not match the ground-truth one  $\beta^*$ . In our experiments Section 5, we observe that this often stems from *simplicity bias* [68], i.e., the CBM’s inference layer tends to acquire specialized functions  $\beta$  that are much simpler than  $\beta^*$ , leading to erroneous predictions OOD. Finally, neither the inference layer  $\beta$  nor the map  $\alpha$  might match the ground-truth, opening the door to additional failure modes. Consider the following example:

**Example 3.5.** *Consider a MNIST-SumParity problem where the training set consists of all possible unique (even, even), (odd, odd), and (odd, even) pairs of MNIST digits, as in Fig. 1. A CBM trained on this data would achieve perfect accuracy by learning a JRS that extracts the parity of each input digit, yielding two binary concepts in  $\{0, 1\}$ , and computes the difference between these two concepts. This JRS involves **much simpler concepts and knowledge** compared to the ground-truth ones. It also mispredicts all OOD pairs where the even digits come before odd digits.*

## 3.2 Theoretical Analysis

We now count the *deterministic* JRSs admitted by a task, i.e., those that lie on the vertices of  $\mathcal{A}$  and  $\mathcal{B}$ :  $(\alpha, \beta) \in \text{Vert}(\mathcal{A}) \times \text{Vert}(\mathcal{B})$ . We then show Theorem 3.9 that this number determines whether general (non-deterministic) JRSs exist.

**Theorem 3.6** (Informal). *Under Assumptions 3.1 and 3.2, the number of deterministic JRSs is:*

$$\sum_{(\alpha, \beta)} \mathbb{I}\left\{ \bigwedge_{\mathbf{g} \in \text{supp}(\mathbf{G})} (\beta \circ \alpha)(\mathbf{g}) = \beta^*(\mathbf{g}) \right\} - C[\mathcal{G}] \quad (6)$$

where the sum runs over  $\text{Vert}(\mathcal{A}) \times \text{Vert}(\mathcal{B})$ , and  $C[\mathcal{G}]$  counts the pairs with intended semantics.

All proofs and the definition of  $C[\mathcal{G}]$  can be found in Appendix C. Intuitively, the first count includes all deterministic pairs  $(\alpha, \beta)$  that achieve maximum likelihood on the training set (i.e., the predicted labels  $(\beta \circ \alpha)(\mathbf{g})$  matches the ground-truth one  $\beta^*(\mathbf{g})$  for all ground-truth concepts  $\mathbf{g}$  appearing in the data), while the second term subtracts those  $(\alpha, \beta)$  that possess the intended semantics as per Definition 3.3. A positive count implies that a CBM trained via maximum likelihood *can* learn a deterministic JRS.

As a sanity check, we show that if prior knowledge  $\mathbf{K}$  is provided – fixing the inference layer to  $\beta^*$  – the number of deterministic JRSs in fact matches that of RSs, as expected:

**Corollary 3.7.** *Consider a fixed  $\beta^* \in \text{Vert}(\mathcal{B})$ . Under Assumptions 3.1 and 3.2, the number of deterministic JRSs  $(\alpha, \beta^*) \in \text{Vert}(\mathcal{A}) \times \text{Vert}(\mathcal{B})$  is:*

$$\sum_{\alpha \in \text{Vert}(\mathcal{A})} \mathbb{I}\left\{ \bigwedge_{\mathbf{g} \in \text{supp}(\mathbf{G})} (\beta^* \circ \alpha)(\mathbf{g}) = \beta^*(\mathbf{g}) \right\} - 1 \quad (7)$$

This matches the count for deterministic RSs in [17].



Corollary 3.7 implies that when  $|\text{Vert}(\mathcal{B})| > 1$ , the number of deterministic JRSs in Eq. (6) can be much **larger** than the number of deterministic RSs (Eq. (7)). For example, in MNIST-SumParity with digits restricted to the range  $[0, 4]$  there exist 64 RSs but about 100 *thousand* JRSs, and the gap increases as we extend the range  $[0, N]$ . An in-depth analysis appears in Appendix B.5.

Next, we show that whenever the number of deterministic JRSs in Eq. (6) is zero, there exist **no JRSs at all**, including non-deterministic ones. This however only applies to CBMs that satisfy the following natural assumption:

**Assumption 3.8** (Extremality). *The inference layer  $\omega \in \Omega$  satisfies extremality if, for all  $\lambda \in (0, 1)$  and for all  $\mathbf{c} \neq \mathbf{c}' \in \mathcal{C}$  such that  $\arg\max_{\mathbf{y} \in \mathcal{Y}} \omega(\mathbb{I}\{\mathbf{C} = \mathbf{c}\})_{\mathbf{y}} \neq \arg\max_{\mathbf{y} \in \mathcal{Y}} \omega(\mathbb{I}\{\mathbf{C} = \mathbf{c}'\})_{\mathbf{y}}$ , it holds:*

$$\max_{\mathbf{y} \in \mathcal{Y}} \omega(\lambda \mathbb{I}\{\mathbf{C} = \mathbf{c}\} + (1 - \lambda) \mathbb{I}\{\mathbf{C} = \mathbf{c}'\})_{\mathbf{y}} \leq \max \left( \max_{\mathbf{y} \in \mathcal{Y}} \omega(\mathbb{I}\{\mathbf{C} = \mathbf{c}\})_{\mathbf{y}}, \max_{\mathbf{y} \in \mathcal{Y}} \omega(\mathbb{I}\{\mathbf{C} = \mathbf{c}'\})_{\mathbf{y}} \right)$$

Intuitively, a CBM satisfies this assumption if its inference layer  $\omega$  is “peaked”: for any two concept vectors  $\mathbf{c}$  and  $\mathbf{c}'$  yielding distinct predictions, the label probability output by  $\omega$  for any mixture distribution thereof is no larger than the label probability that it associates to  $\mathbf{c}$  and  $\mathbf{c}'$ . That is, distributing probability mass across concepts does not increase label likelihood. While this assumption does not hold for general CBMs, we show in Appendix E that it holds for popular architectures, including most of those that we experiment with. Under Assumption 3.8, the next result holds:

**Theorem 3.9** (Identifiability). *Under Assumptions 3.1 and 3.2, if the number of deterministic JRSs (Eq. (6)) is zero then every CBM  $(\mathbf{f}, \omega) \in \mathcal{F} \times \Omega$  satisfying Assumption 3.8 that attains maximum log-likelihood (Eq. (4)) possesses the intended semantics (Definition 3.3). That is, the pair  $(\alpha, \beta) \in \mathcal{A} \times \mathcal{B}$  entailed by each such CBM is equivalent to the ground-truth pair  $(\text{id}, \beta^*)$ , i.e.,  $(\alpha, \beta) \sim (\text{id}, \beta^*)$ .*

Clearly, a similar conclusion does not hold for models that do not satisfy Assumption 3.8: even when deterministic JRSs are absent, a CBM can still be affected by non-deterministic JRSs.

## 4 Practical Solutions

By Theorem 3.9, getting rid of *deterministic* JRSs from a task prevents CBMs trained via maximum log-likelihood to learn JRS altogether. Next, we discuss strategies for achieving this goal and will assess them empirically in Section 5. An in-depth technical analysis is left to Appendix D.

**Supervised strategies.** The most direct strategies for controlling the semantics of learned CBMs rely on supervision. **Concept supervision** is the go-to solution for improving concept quality in CBMs [2, 69, 3, 4] and NeSy-CBMs [20, 19]. Full concept supervision prevents learning  $\alpha \neq \text{id}$ . However, this does not translate into guarantees on the inference layer  $\beta$ , at least in tasks affected by confounding factors such as spurious correlations among concepts [12]. E.g., if the  $i$ -th and  $j$ -th ground-truth concepts are strongly correlated, the inference layer  $\beta$  can interchangeably use either, regardless of what  $\beta^*$  does.

Another option is employing **knowledge distillation** [70], that is, supplying supervision of the form  $(\mathbf{g}, \mathbf{y})$  to encourage the learned knowledge  $\beta$  to be close to  $\beta^*$  for the supervised  $\mathbf{g}$ ’s. This supervision is available for free provided concept supervision is available, but can also be obtained separately, e.g., by interactively collecting user interventions [53, 54, 55]. This strategy cannot avoid *all* JRSs because even if  $\beta = \beta^*$ , the CBM may suffer from regular RSs (i.e.,  $\alpha$  does not match the identity function  $\text{id}$ ).

Another option is to fit a CBM on **multiple tasks** [71] sharing concepts. It is known that a NeSy-CBM attaining optimal likelihood on multiple NeSy tasks with different prior knowledges is also optimal for the *single* NeSy task obtained by conjoining those knowledges [17]: this more constrained knowledge better steers the semantics of the learned concepts, ruling out potential JRSs. Naturally, collecting a sufficiently large number of diverse tasks using the same concepts can be highly non-trivial, depending on the application.

**Unsupervised strategies.** Many popular strategies for improving concept quality in (NeSy) CBMs are unsupervised. A cheap but effective one when dealing with multiple inputs is to **process inputs individually**, preventing mixing between their concepts. E.g., In MNIST-SumParity one can apply the same digit extractor to each digit separately, while for images with multiple objects one can first

segment them (e.g., with YoloV11 [72]) and then process the resulting bounding boxes individually. This is extremely helpful for reducing, and possibly overcoming, RSs [17] and frequently used in practice [40, 73, 49, 50]. We apply it in all our experiments.

Both supervised [4] and unsupervised [1, 74] CBMs may employ a *reconstruction* penalty [75, 76] to encourage learning informative concepts. Reconstruction can help prevent collapsing distinct ground-truth concepts into single learned concepts, e.g., in MNIST-SumParity the odd digits cannot be collapsed together without impairing reconstruction.<sup>3</sup> Alternatively, one can employ *entropy maximization* [77] to spread concept activations evenly across the bottleneck. This can be viewed as a less targeted but more efficient alternative to reconstruction, which becomes impractical for higher dimensional inputs. Another option is *contrastive learning* [78], in that augmentations render learned concepts more robust to style variations [79], e.g., for MNIST-based tasks it helps to cluster distinct digits [80]. Unsupervised strategies all implicitly counteract *simplicity bias* whereby  $\alpha$  ends up collapsing.

## 5 Case Studies

We tackle the following key research questions: **Q1.** Are CBMs affected by JRSs in practice? **Q2.** Do JRSs affect interpretability and OOD behavior? **Q3.** Can existing mitigation strategies prevent JRSs? [Appendix A](#) reports additional details about the tasks, architectures, and model selection.

**Models.** We evaluate several (also NeSy) CBMs. DeepProbLog (DPL) [40, 77] is the *only* method supplied with the ground-truth knowledge  $K$ , and uses probabilistic-logic reasoning to ensure predictions are consistent with it. CBNM is a Concept-Bottleneck Model [2] with no supervision on the concepts. Deep Symbolic Learning (DSL) [49] is a SOTA NeSy-CBM that learns concepts and symbolic knowledge jointly; it implements the latter as a truth table and reasoning using fuzzy logic. We also consider two variants: DPL\* replaces fuzzy with probabilistic logic, while *bears\** wraps DPL\* within BEARS [81], an ensemble approach for handling regular RSs. In short, *bears\** consists of a learned inference layer and multiple concept extractors. The former is learned only once, the latter are learned sequentially. We also evaluate Self-explainable Neural Networks (SENN) [1], unsupervised CBMs that include a reconstruction penalty. Since they do not satisfy our assumptions, they are useful to empirically assess the generality of our remarks.

**Data sets.** To assess both learned concepts and inference layer, we use three representative NeSy tasks with explicit concept annotations and prior knowledge. MNIST-Add [40] involves predicting the sum of two MNIST digits, and serves as a sanity check as it provably contains no RSs. MNIST-SumParity is similar except we have to predict the *parity* of the sum, as in [Fig. 1](#), and admits many JRSs. We also include a variant of CLevr [82] in which images belong to 3 classes as determined by a logic formula and only contain 2 to 4 objects, for scalability. Finally, we carry out basic checks also on BDD-OIA [83], a real-world autonomous driving task in [Appendix B](#) due to space constraints.

**Metrics.** For each CBM, we evaluate predicted labels and concepts with the  $F_1$  score (resp.  $F_1(Y)$  and  $F_1(C)$ ) on the test split. Computing  $F_1(C)$  requires to first align the predicted concepts to ground-truth annotations. We do so by using the Hungarian algorithm [62] to find a permutation  $\pi$  that maximizes the Pearson correlation across concepts. Concept collapse  $Cls(C)$  quantifies to what extent the concept extractor blends different *ground-truth* concepts together: high collapse indicates that it predicts fewer concepts than expected. We measure the quality of the learned inference layer  $\beta$  as follows: for each example, we reorder the concept annotations  $\mathbf{g}$  using  $\pi$ , feed the result to  $\beta$  and compute the  $F_1$  score ( $F_1(\beta)$ ) of its predictions. See [Appendix A.5](#) for details.

**Mitigation strategies.** We evaluate all strategies discussed in [Section 4](#) as well as a combination of all unsupervised mitigations, denoted H+R+C (entropy, reconstruction, contrastive). Implementations are taken verbatim from [20]. For contrastive learning, we apply an InfoNCE loss to the predicted concept distribution with the augmentations suggested by Chen et al. [78]. For knowledge distillation, the inference layer is fed ground-truth concepts and trained to optimize the log-likelihood of the corresponding labels.

<sup>3</sup>This is provably the case *context-style separation* i.e., assuming concepts are independent of stylistic features like calligraphy [17, Proposition 6].

Table 1: Results for MNIST-Add.

| METHOD | $F_1(Y)$ ( $\uparrow$ ) | $F_1(C)$ ( $\uparrow$ ) | $\text{Cls}(C)$ ( $\downarrow$ ) | $F_1(\beta)$ ( $\uparrow$ ) |
|--------|-------------------------|-------------------------|----------------------------------|-----------------------------|
| DPL    | $0.98 \pm 0.01$         | $0.99 \pm 0.01$         | $0.01 \pm 0.01$                  | —                           |
| CBNM   | $0.98 \pm 0.01$         | $0.99 \pm 0.01$         | $0.01 \pm 0.01$                  | $1.00 \pm 0.01$             |
| SENN   | $0.97 \pm 0.01$         | $0.80 \pm 0.07$         | $0.01 \pm 0.01$                  | $0.75 \pm 0.08$             |
| DSL    | $0.96 \pm 0.02$         | $0.98 \pm 0.01$         | $0.01 \pm 0.01$                  | $1.00 \pm 0.01$             |
| DPL*   | $0.91 \pm 0.09$         | $0.92 \pm 0.08$         | $0.01 \pm 0.01$                  | $0.90 \pm 0.08$             |
| bears* | $0.76 \pm 0.15$         | $0.87 \pm 0.13$         | $0.01 \pm 0.01$                  | $0.67 \pm 0.14$             |

Table 3: Results for Clevr.

| METHOD | $F_1(Y)$ ( $\uparrow$ ) | $F_1(C)$ ( $\uparrow$ ) | $\text{Cls}(C)$ ( $\downarrow$ ) | $F_1(\beta)$ ( $\uparrow$ ) |
|--------|-------------------------|-------------------------|----------------------------------|-----------------------------|
| DPL    | $0.99 \pm 0.01$         | $0.25 \pm 0.05$         | $0.57 \pm 0.02$                  | —                           |
| CBNM   | $0.99 \pm 0.01$         | $0.19 \pm 0.06$         | $0.35 \pm 0.09$                  | $0.01 \pm 0.02$             |
| DPL*   | $0.99 \pm 0.01$         | $0.22 \pm 0.04$         | $0.57 \pm 0.03$                  | $0.01 \pm 0.01$             |

Table 2: Results for MNIST-SumParity.

| METHOD | $F_1(Y)$ ( $\uparrow$ ) | $F_1(C)$ ( $\uparrow$ ) | $\text{Cls}(C)$ ( $\downarrow$ ) | $F_1(\beta)$ ( $\uparrow$ ) |
|--------|-------------------------|-------------------------|----------------------------------|-----------------------------|
| DPL    | $0.99 \pm 0.01$         | $0.43 \pm 0.08$         | $0.36 \pm 0.15$                  | —                           |
| CBNM   | $0.90 \pm 0.18$         | $0.09 \pm 0.03$         | $0.66 \pm 0.09$                  | $0.54 \pm 0.04$             |
| SENN   | $0.99 \pm 0.01$         | $0.49 \pm 0.05$         | $0.01 \pm 0.01$                  | $0.53 \pm 0.06$             |
| DSL    | $0.94 \pm 0.03$         | $0.07 \pm 0.01$         | $0.80 \pm 0.01$                  | $0.52 \pm 0.01$             |
| DPL*   | $0.99 \pm 0.01$         | $0.07 \pm 0.01$         | $0.80 \pm 0.01$                  | $0.50 \pm 0.05$             |
| bears* | $0.99 \pm 0.01$         | $0.30 \pm 0.03$         | $0.22 \pm 0.04$                  | $0.36 \pm 0.09$             |

Table 4: CBNM on biased MNIST-SumParity.

| C-SUP | K-SUP | ID                      |                             | OOD                     |                             |
|-------|-------|-------------------------|-----------------------------|-------------------------|-----------------------------|
|       |       | $F_1(Y)$ ( $\uparrow$ ) | $F_1(\beta)$ ( $\uparrow$ ) | $F_1(Y)$ ( $\uparrow$ ) | $F_1(\beta)$ ( $\uparrow$ ) |
| 0%    | 0%    | $0.99 \pm 0.01$         | $0.55 \pm 0.05$             | $0.01 \pm 0.01$         | $0.47 \pm 0.07$             |
| 0%    | 100%  | $0.99 \pm 0.01$         | $0.56 \pm 0.06$             | $0.01 \pm 0.01$         | $0.58 \pm 0.08$             |
| 100%  | 0%    | $0.97 \pm 0.01$         | $0.88 \pm 0.04$             | $0.40 \pm 0.14$         | $0.31 \pm 0.12$             |
| 100%  | 100%  | $0.97 \pm 0.01$         | $0.95 \pm 0.01$             | $0.97 \pm 0.02$         | $0.69 \pm 0.27$             |

**Q1: All tested CBMs suffer from JRSs and simplicity bias.** We analyze three learning tasks of increasing complexity. MNIST-Add provably contains no JRSs and thus satisfies the preconditions of [Theorem 3.9](#). Compatibly, all CBMs attain high label performance ( $F_1(Y) \geq 90\%$ ) and high-quality semantics, as shown by the values of  $F_1(C)$  ( $\geq 90\%$ ) and  $F_1(\beta)$  ( $\geq 75\%$ ) seen in [Table 1](#). The only exception is bears\*, which by design trades off performance for calibration. However, in MNIST-SumParity and Clevr,<sup>4</sup> which are more complex, *all models lack intended semantics*. This is clear from [Tables 2](#) and [3](#): despite attaining high  $F_1(Y)$  ( $\geq 90\%$ ), the learned concepts and inference layer are low quality:  $F_1(C)$  is always low – it never crosses the 50% mark – and  $F_1(\beta)$  is at best around chance level. Our results on BDD-OIA in [Appendix B](#) show the very same trend.

The behavior of concept collapse strongly hints at *simplicity bias*. While no collapse takes place in MNIST-Add ( $\text{Cls}(C) \leq 0.01$ , i.e., digits are not compacted together), in MNIST-SumParity and Clevr collapse is omnipresent ( $\text{Cls}(C) \geq 0.22$ ), suggesting that CBMs are prone to simplicity bias, as expected. SENN is an outlier, likely due to the higher capacity of its inference layer (rather than reconstruction, which is entirely ineffective in **Q3**). Even having access to the ground-truth knowledge is ineffective, as shown by the high degree of collapse displayed by DPL.

**Q2: JRSs compromise OOD behavior and supervision only partially helps.** We evaluate the impact of JRSs and supervision on OOD behavior by training a CBNM on the biased version of MNIST-SumParity in [Fig. 1](#). The in-distribution (ID) data comprise all (odd, odd), (even, even), and (odd, even) pairs of MNIST digits, while the OOD split contains all (even, odd) pairs. [Table 4](#) reports performance under varying levels of concept and knowledge supervision. While all models produce high-quality predictions in-distribution ( $F_1(Y) \geq 0.97$ ), only the CBNM receiving complete supervision attains acceptable OOD predictions: for the others,  $F_1(Y) \leq 0.40$ . Even in this case, though, the inference layer still does not have intended semantics, as shown by  $F_1(\beta) \leq 70\%$ .

**Q3: Popular CBM and RS mitigations fall short.** Finally, we test mitigation strategies on CBNM trained on MNIST-SumParity and Clevr, ablating the amount of supervision. The results for MNIST-SumParity in [Fig. 3](#) show while concept supervision ( $x$ -axis) helps all metrics, adding reconstruction, entropy maximization, and contrastive learning to the mix brings no benefits for concept and knowledge ( $F_1(C)$ ,  $F_1(\beta)$ ) quality, not even when combined (orange curve). Knowledge supervision is also ineffective (blue lines), likely because MNIST-SumParity and Clevr suffer from RSs even when the model is supplied prior knowledge. Contrastive learning improves concept collapse ( $\text{Cls}(C)$ ): the orange and purple curves in [Fig. 3](#) (right) show it can prevent CBMs from mixing concepts together. The results for Clevr in [Appendix B](#) show similar trends.

## 6 Related Work

**Shortcuts in machine learning.** Shortcuts occur when machine learning models solve a prediction task by using features that correlate with but do not cause the desired output, leading to poor OOD behavior [\[10, 8, 84, 85\]](#). Existing work focuses on black-box models rather than CBMs. Existing studies on the semantics of CBM concepts [\[86, 13, 87, 88\]](#) focus on individual failures but lack formal notion of intended semantics. One exception is [\[15\]](#) which, however, ignores the role of the inference layer. We build on known results on reasoning shortcuts [\[89, 17, 18, 52\]](#) which are

<sup>4</sup>For Clevr, we focus on representative CBMs with high fit on the training data.



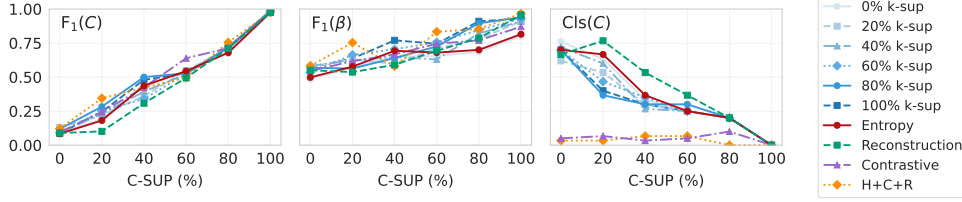

Figure 3: **Traditional mitigations have limited effect** on CBNM for MNIST-SumParity. The only outlier is contrastive learning (orange and purple), which consistently ameliorates concept collapse.

restricted to NeSy-CBMs in which the prior knowledge is given and fixed. Our analysis upgrades these results to general CBMs. Furthermore, our simulations indicate that strategies that are effective for CBMs and RSs no longer work for JRSs. At the same time, while NeSy approaches that learn prior knowledge and concepts jointly are increasingly popular [47, 90, 48, 49, 50, 51], existing work neglects the issue of shortcuts in this setting. Our work partially fills this gap.

**Relation to identifiability.** Works in Independent Component Analysis and Causal Representation Learning focus on the identifiability of representations up to an equivalence relation, typically up to permutations and rescaling [91, 92, 67] or more general transformations [93, 94]. The equivalence relation introduced along with intended semantics (Definition 3.3) establishes a specific connection between the maps  $\alpha$  and  $\beta$ . This aligns with existing works that aim to identify representations and linear inference layers using supervised labels [66, 95, 96, 5]. Moreover, while prior works primarily focus on identifying real-valued representations, we examine the identifiability of *discrete* concepts *and* of the inference layer. [97] explores the identifiability of (potentially discrete) concepts linearly encoded in model representations but focuses on multi-environment settings. Our results differ in that we show how concepts can be identified in CBMs by circumventing joint reasoning shortcuts.

## 7 Conclusion

We study the issue of learning CBMs and NeSy-CBMs with high-quality concepts and inference layers. We formalize intended semantics and joint reasoning shortcuts (JRSs), showing how, under suitable assumptions, zeroing the number of *deterministic* JRSs provably prevents *all* JRSs, yielding identifiability. Numerical simulations indicate that JRSs are very frequent and impactful, and that the only (partially) beneficial mitigation strategy is contrastive learning. Our work paves the way to the design of effective solutions and therefore more robust and interpretable CBMs. In future work, we plan to extend our theory to general neural nets and large language models, and we will take a closer look at more complex mitigations such as smartly constraining the inference layer [48, 51], debiasing [11], and human interaction [8].

## 8 Broader Impact

With this work, we aim to highlight the issue of joint reasoning shortcuts in concept-based models and their subtle but impactful consequences on the trustworthiness and interpretability of these models, as well as on their reliability in out-of-distribution scenarios. It also highlights the limited effect of unsupervised mitigation strategies, thus pointing out a significant gap in our toolbox for addressing joint reasoning shortcuts effectively and cheaply. Our work also provides a solid theoretical foundation upon which further studies can build.

## References

- [1] David Alvarez-Melis and Tommi S Jaakkola. Towards robust interpretability with self-explaining neural networks. In *NeurIPS*, 2018.
- [2] Pang Wei Koh, Thao Nguyen, Yew Siang Tang, Stephen Mussmann, Emma Pierson, Been Kim, and Percy Liang. Concept bottleneck models. In *International conference on machine learning*, pages 5338–5348. PMLR, 2020.
- [3] Mateo Espinosa Zarlenga, Pietro Barbiero, Gabriele Ciravegna, Giuseppe Marra, Francesco Giannini, Michelangelo Diligenti, Frederic Precioso, Stefano Melacci, Adrian Weller, Pietro Lio, et al. Concept embedding models. In *NeurIPS 2022-36th Conference on Neural Information Processing Systems*, 2022.
- [4] Emanuele Marconato, Andrea Passerini, and Stefano Teso. Glancenets: Interpretable, leak-proof concept-based models. *Advances in Neural Information Processing Systems*, 35:21212–21227, 2022.
- [5] Armeen Taeb, Nicolo Ruggeri, Carina Schnuck, and Fanny Yang. Provable concept learning for interpretable predictions using variational autoencoders, 2022.
- [6] Gesina Schwalbe. Concept embedding analysis: A review. *arXiv preprint arXiv:2203.13909*, 2022.
- [7] Eleonora Poeta, Gabriele Ciravegna, Eliana Pastor, Tania Cerquitelli, and Elena Baralis. Concept-based explainable artificial intelligence: A survey. *arXiv preprint arXiv:2312.12936*, 2023.
- [8] Stefano Teso, Öznur Alkan, Wolfgang Stammer, and Elizabeth Daly. Leveraging explanations in interactive machine learning: An overview. *Frontiers in AI*, 2023.
- [9] Avani Gupta and PJ Narayanan. A survey on concept-based approaches for model improvement. *arXiv preprint arXiv:2403.14566*, 2024.
- [10] Robert Geirhos, Jörn-Henrik Jacobsen, Claudio Michaelis, Richard Zemel, Wieland Brendel, Matthias Bethge, and Felix A Wichmann. Shortcut learning in deep neural networks. *Nature Machine Intelligence*, 2(11):665–673, 2020.
- [11] Mohammad Taha Bahadori and David Heckerman. Debiasing concept-based explanations with causal analysis. In *ICLR*, 2021.
- [12] Wolfgang Stammer, Patrick Schramowski, and Kristian Kersting. Right for the Right Concept: Revising Neuro-Symbolic Concepts by Interacting with their Explanations. In *Proceedings of the IEEE/CVF Conference on Computer Vision and Pattern Recognition*, pages 3619–3629, 2021.
- [13] Anita Mahinpei, Justin Clark, Isaac Lage, Finale Doshi-Velez, and Weiwei Pan. Promises and pitfalls of black-box concept learning models. In *International Conference on Machine Learning: Workshop on Theoretic Foundation, Criticism, and Application Trend of Explainable AI*, volume 1, pages 1–13, 2021.
- [14] Mateo Espinosa Zarlenga, Pietro Barbiero, Zohreh Shams, Dmitry Kazhdan, Umang Bhatt, Adrian Weller, and Mateja Jamnik. Towards robust metrics for concept representation evaluation. In *AAAI*, 2023.
- [15] Emanuele Marconato, Andrea Passerini, and Stefano Teso. Interpretability is in the mind of the beholder: A causal framework for human-interpretable representation learning. *Entropy*, 2023.
- [16] Oscar Chang, Lampros Flokas, Hod Lipson, and Michael Spranger. Assessing satnet’s ability to solve the symbol grounding problem. *NeurIPS*, 2020.
- [17] Emanuele Marconato, Stefano Teso, Antonio Vergari, and Andrea Passerini. Not all neuro-symbolic concepts are created equal: Analysis and mitigation of reasoning shortcuts. In *NeurIPS*, 2023.

- 417 [18] Kaifu Wang, Efi Tsamoura, and Dan Roth. On learning latent models with multi-instance  
418 weak supervision. In *NeurIPS*, 2023.
- 419 [19] Xiao-Wen Yang, Wen-Da Wei, Jie-Jing Shao, Yu-Feng Li, and Zhi-Hua Zhou. Analysis for  
420 abductive learning and neural-symbolic reasoning shortcuts. In *ICML*, 2024.
- 421 [20] Samuele Bortolotti et al. A benchmark suite for systematically evaluating reasoning shortcuts.  
422 In *NeurIPS Datasets & Benchmarks Track*, 2024.
- 423 [21] Mert Yuksekgonul, Maggie Wang, and James Zou. Post-hoc concept bottleneck models.  
424 *arXiv preprint arXiv:2205.15480*, 2022.
- 425 [22] Zhenzhen Wang, Aleksander Popel, and Jeremias Sulam. Cbm-zero: Concept bottleneck  
426 model with zero performance loss. 2024.
- 427 [23] Gabriele Dominici, Pietro Barbiero, Francesco Giannini, Martin Gjoreski, and Marc  
428 Langhenirich. Anycbms: How to turn any black box into a concept bottleneck model. *arXiv*  
429 *preprint arXiv:2405.16508*, 2024.
- 430 [24] Ričards Marcinkevičs, Sonia Laguna, and Moritz Vandenhirtz. Beyond concept bottleneck  
431 models: How to make black boxes intervenable? In *NeurIPS*, 2024.
- 432 [25] Yoshihide Sawada and Keigo Nakamura. Concept bottleneck model with additional unsuper-  
433 vised concepts. *IEEE Access*, 10:41758–41765, 2022.
- 434 [26] Eunji Kim, Dahuin Jung, Sangha Park, Siwon Kim, and Sungroh Yoon. Probabilistic concept  
435 bottleneck models. In *International Conference on Machine Learning*, pages 16521–16540.  
436 PMLR, 2023.
- 437 [27] David Debot, Pietro Barbiero, Francesco Giannini, Gabriele Ciravegna, Michelangelo Dili-  
438 genti, and Giuseppe Marra. Interpretable concept-based memory reasoning. In *NeurIPS*,  
439 2024.
- 440 [28] Lei Huang, Weijiang Yu, Weitao Ma, Weihong Zhong, Zhangyin Feng, Haotian Wang, Qiang-  
441 long Chen, Weihua Peng, Xiaocheng Feng, Bing Qin, et al. A survey on hallucination in large  
442 language models: Principles, taxonomy, challenges, and open questions. *ACM Transactions*  
443 *on Information Systems*, 2024.
- 444 [29] Zechen Sun, Yisheng Xiao, Juntao Li, Yixin Ji, Wenliang Chen, and Min Zhang. Exploring  
445 and mitigating shortcut learning for generative large language models. In *LREC-COLING*,  
446 2024.
- 447 [30] Tuomas Oikarinen, Subhro Das, Lam M Nguyen, and Tsui-Wei Weng. Label-free concept  
448 bottleneck models. In *ICLR*, 2022.
- 449 [31] Yue Yang, Artemis Panagopoulou, Shenghao Zhou, Daniel Jin, Chris Callison-Burch, and  
450 Mark Yatskar. Language in a bottle: Language model guided concept bottlenecks for inter-  
451 pretable image classification. In *CVPR*, 2023.
- 452 [32] Divyansh Srivastava, Ge Yan, and Tsui-Wei Weng. VLG-CBM: Training concept bottleneck  
453 models with vision-language guidance. In *NeurIPS*, 2024.
- 454 [33] Nicola Debole, Pietro Barbiero, Francesco Giannini, Andrea Passerini, Stefano Teso, and  
455 Emanuele Marconato. If concept bottlenecks are the question, are foundation models the  
456 answer?, 2025. URL <https://arxiv.org/abs/2504.19774>.
- 457 [34] Chaofan Chen, Oscar Li, Daniel Tao, Alina Barnett, Cynthia Rudin, and Jonathan K Su. This  
458 looks like that: Deep learning for interpretable image recognition. *NeurIPS*, 2019.
- 459 [35] Simon Schrod, Julian Schur, Max Argus, and Thomas Brox. Concept bottleneck models  
460 without predefined concepts. *arXiv preprint arXiv:2407.03921*, 2024.
- 461 [36] Michelangelo Diligenti, Marco Gori, Marco Maggini, and Leonardo Rigutini. Bridging logic  
462 and kernel machines. *Machine learning*, 86(1):57–88, 2012.

- [37] Ivan Donadello, Luciano Serafini, and Artur D’Avila Garcez. Logic tensor networks for semantic image interpretation. In *IJCAI*, 2017.
- [38] Jingyi Xu, Zilu Zhang, Tal Friedman, Yitao Liang, and Guy Broeck. A semantic loss function for deep learning with symbolic knowledge. In *ICML*, 2018.
- [39] Marco Lippi and Paolo Frasconi. Prediction of protein  $\beta$ -residue contacts by markov logic networks with grounding-specific weights. *Bioinformatics*, 2009.
- [40] Robin Manhaeve, Sebastijan Dumancic, Angelika Kimmig, Thomas Demeester, and Luc De Raedt. DeepProbLog: Neural Probabilistic Logic Programming. *NeurIPS*, 2018.
- [41] Eleonora Giunchiglia and Thomas Lukasiewicz. Coherent hierarchical multi-label classification networks. *NeurIPS*, 2020.
- [42] Nick Hoernle, Rafael Michael Karampatsis, Vaishak Belle, and Kobi Gal. Multiplexnet: Towards fully satisfied logical constraints in neural networks. In *AAAI*, 2022.
- [43] Kareem Ahmed, Stefano Teso, Kai-Wei Chang, Guy Van den Broeck, and Antonio Vergari. Semantic Probabilistic Layers for Neuro-Symbolic Learning. In *NeurIPS*, 2022.
- [44] Yann LeCun. The mnist database of handwritten digits. <http://yann.lecun.com/exdb/mnist/>, 1998.
- [45] Lotfi Asker Zadeh. Fuzzy logic. *Computer*, 1988.
- [46] Luc De Raedt and Angelika Kimmig. Probabilistic (logic) programming concepts. *Machine Learning*, 100:5–47, 2015.
- [47] Po-Wei Wang, Priya Donti, Bryan Wilder, and Zico Kolter. Satnet: Bridging deep learning and logical reasoning using a differentiable satisfiability solver. In *International Conference on Machine Learning*, pages 6545–6554. PMLR, 2019.
- [48] Anji Liu, Hongming Xu, Guy Van den Broeck, and Yitao Liang. Out-of-distribution generalization by neural-symbolic joint training. In *Proceedings of the AAAI Conference on Artificial Intelligence*, volume 37, pages 12252–12259, 2023.
- [49] Alessandro Daniele, Tommaso Campari, Sagar Malhotra, and Luciano Serafini. Deep symbolic learning: discovering symbols and rules from perceptions. In *IJCAI*, 2023.
- [50] Hao Tang and Kevin Ellis. From perception to programs: regularize, overparameterize, and amortize. In *ICML*, 2023.
- [51] Antonia Wüst, Wolfgang Stammer, Quentin Delfosse, Devendra Singh Dhami, and Kristian Kersting. Pix2code: Learning to compose neural visual concepts as programs. *arXiv preprint arXiv:2402.08280*, 2024.
- [52] Elena Umili, Francesco Argenziano, and Roberto Capobianco. Neural reward machines. In *ECAI 2024*, pages 3055–3062. Ios Press, 2024.
- [53] Sungbin Shin, Yohan Jo, Sungsoo Ahn, and Namhoon Lee. A closer look at the intervention procedure of concept bottleneck models. In *ICML*, 2023.
- [54] Mateo Espinosa Zarlenga, Katie Collins, Krishnamurthy Dvijotham, Adrian Weller, Zohreh Shams, and Mateja Jamnik. Learning to receive help: Intervention-aware concept embedding models. *NeurIPS*, 2024.
- [55] David Steinmann, Wolfgang Stammer, Felix Friedrich, and Kristian Kersting. Learning to intervene on concept bottlenecks. In *ICML*, 2024.
- [56] Piyawat Lertvittayakumjorn, Lucia Specia, and Francesca Toni. Find: human-in-the-loop debugging deep text classifiers. In *Conference on Empirical Methods in Natural Language Processing*, pages 332–348, 2020.

- [57] Xuan Xie, Kristian Kersting, and Daniel Neider. Neuro-symbolic verification of deep neural networks. In *IJCAI*, 2022.
- [58] Faried Abu Zaid, Dennis Diekmann, and Daniel Neider. Distribution-aware neuro-symbolic verification. *AISoLA*, pages 445–447, 2023.
- [59] Paolo Morettin, Andrea Passerini, and Roberto Sebastiani. A unified framework for probabilistic verification of ai systems via weighted model integration. *arXiv preprint arXiv:2402.04892*, 2024.
- [60] Jason Morton. Relations among conditional probabilities. *Journal of Symbolic Computation*, 50:478–492, 2013.
- [61] Guido Montúfar, Johannes Rauh, and Nihat Ay. On the fisher metric of conditional probability polytopes. *Entropy*, 2014.
- [62] Harold W Kuhn. The hungarian method for the assignment problem. *Naval research logistics quarterly*, 1955.
- [63] Ilyes Khemakhem, Ricardo Monti, Diederik Kingma, and Aapo Hyvarinen. Ice-beem: Identifiable conditional energy-based deep models based on nonlinear ica. *Advances in Neural Information Processing Systems*, 33:12768–12778, 2020.
- [64] Luigi Gresele, Julius Von Kügelgen, Vincent Stimper, Bernhard Schölkopf, and Michel Besserve. Independent mechanism analysis, a new concept? *Advances in neural information processing systems*, 34:28233–28248, 2021.
- [65] Phillip Lippe, Sara Magliacane, Sindy Löwe, Yuki M Asano, Taco Cohen, and Efstratios Gavves. Biscuit: Causal representation learning from binary interactions. In *Uncertainty in Artificial Intelligence*, pages 1263–1273. PMLR, 2023.
- [66] Sebastien Lachapelle, Tristan Deleu, Divyat Mahajan, Ioannis Mitliagkas, Yoshua Bengio, Simon Lacoste-Julien, and Quentin Bertrand. Synergies between disentanglement and sparsity: Generalization and identifiability in multi-task learning. In *ICML*, 2023.
- [67] Julius von Kügelgen, Michel Besserve, Liang Wendong, Luigi Gresele, Armin Kekić, Elias Bareinboim, David Blei, and Bernhard Schölkopf. Nonparametric identifiability of causal representations from unknown interventions. *Advances in Neural Information Processing Systems*, 36, 2024.
- [68] Yu Yang, Eric Gan, Gintare Karolina Dziugaite, and Baharan Mirzasoleiman. Identifying spurious biases early in training through the lens of simplicity bias. In *AISTATS*, 2024.
- [69] Zhi Chen, Yijie Bei, and Cynthia Rudin. Concept whitening for interpretable image recognition. *Nature Machine Intelligence*, 2020.
- [70] Cristian Bucilu, Rich Caruana, and Alexandru Niculescu-Mizil. Model compression. In *Proceedings of the 12th ACM SIGKDD International Conference on Knowledge Discovery and Data Mining*, 2006. URL <https://doi.org/10.1145/1150402.1150464>.
- [71] Rich Caruana. Multitask learning. *Machine learning*, 1997.
- [72] Glenn Jocher, Jing Qiu, and Ayush Chaurasia. Ultralytics YOLO, January 2023. URL <https://github.com/ultralytics/ultralytics>.
- [73] Emile van Krieken, Thiviyan Thanapalasingam, Jakub M Tomczak, Frank van Harmelen, and Annette ten Teije. A-nesi: A scalable approximate method for probabilistic neurosymbolic inference. *arXiv preprint arXiv:2212.12393*, 2022.
- [74] Oscar Li, Hao Liu, Chaofan Chen, and Cynthia Rudin. Deep learning for case-based reasoning through prototypes: A neural network that explains its predictions. In *AAAI*, 2018.
- [75] Pierre Baldi. Autoencoders, unsupervised learning, and deep architectures. In *ICML Workshop on Unsupervised and Transfer Learning*, 2012.



- [76] Diederik P Kingma. Auto-encoding variational bayes. *arXiv preprint arXiv:1312.6114*, 2013.
- [77] Robin Manhaeve, Sebastijan Dumančić, Angelika Kimmig, Thomas Demeester, and Luc De Raedt. Neural probabilistic logic programming in deepproblog. *Artificial Intelligence*, 298:103504, 2021.
- [78] Ting Chen, Simon Kornblith, Mohammad Norouzi, and Geoffrey Everest Hinton. A simple framework for contrastive learning of visual representations. 2020.
- [79] Julius Von Kügelgen, Yash Sharma, Luigi Gresele, Wieland Brendel, Bernhard Schölkopf, Michel Besserve, and Francesco Locatello. Self-supervised learning with data augmentations provably isolates content from style. *Advances in neural information processing systems*, 34:16451–16467, 2021.
- [80] Emanuele Sansone and Robin Manhaeve. Learning Symbolic Representations Through Joint GEnerative and DIscriminative Training. In *IJCAI 2023 Workshop on Knowledge-Based Compositional Generalization*, 2023.
- [81] Emanuele Marconato, Samuele Bortolotti, Emile van Krieken, Antonio Vergari, Andrea Passerini, and Stefano Teso. BEARS Make Neuro-Symbolic Models Aware of their Reasoning Shortcuts. *Uncertainty in AI*, 2024.
- [82] Justin Johnson, Bharath Hariharan, Laurens Van Der Maaten, Li Fei-Fei, C Lawrence Zitnick, and Ross Girshick. Clevr: A diagnostic dataset for compositional language and elementary visual reasoning. In *CVPR*, 2017.
- [83] Yiran Xu, Xiaoyin Yang, Lihang Gong, Hsuan-Chu Lin, Tz-Ying Wu, Yunsheng Li, and Nuno Vasconcelos. Explainable object-induced action decision for autonomous vehicles. In *IEEE/CVF Conference on Computer Vision and Pattern Recognition (CVPR)*, June 2020.
- [84] Wenqian Ye, Guangtao Zheng, Xu Cao, Yunsheng Ma, and Aidong Zhang. Spurious correlations in machine learning: A survey. *arXiv preprint arXiv:2402.12715*, 2024.
- [85] David Steinmann, Felix Divo, Maurice Kraus, Antonia Wüst, Lukas Struppek, Felix Friedrich, and Kristian Kersting. Navigating shortcuts, spurious correlations, and confounders: From origins via detection to mitigation. *arXiv preprint arXiv:2412.05152*, 2024.
- [86] Andrei Margeloiu, Matthew Ashman, Umang Bhatt, Yanzhi Chen, Mateja Jamnik, and Adrian Weller. Do concept bottleneck models learn as intended? *arXiv preprint arXiv:2105.04289*, 2021.
- [87] Marton Havasi, Sonali Parbhoo, and Finale Doshi-Velez. Addressing leakage in concept bottleneck models. 2022.
- [88] Naveen Raman, Mateo Espinosa Zarlenga, Juyeon Heo, and Mateja Jamnik. Do concept bottleneck models obey locality? In *XAI in Action: Past, Present, and Future Applications*, 2023.
- [89] Zenan Li, Zehua Liu, Yuan Yao, Jingwei Xu, Taolue Chen, Xiaoxing Ma, L Jian, et al. Learning with logical constraints but without shortcut satisfaction. In *ICLR*, 2023.
- [90] Zhun Yang, Adam Ishay, and Joohyung Lee. Neurasp: Embracing neural networks into answer set programming. In *IJCAI 2020*, 2020.
- [91] Ilyes Khemakhem, Diederik Kingma, Ricardo Monti, and Aapo Hyvarinen. Variational autoencoders and nonlinear ica: A unifying framework. In *AISTATS*, 2020.
- [92] Luigi Gresele, Paul K Rubenstein, Arash Mehrjou, Francesco Locatello, and Bernhard Schölkopf. The incomplete rosetta stone problem: Identifiability results for multi-view non-linear ica. In *Uncertainty in Artificial Intelligence*, pages 217–227. PMLR, 2020.
- [93] Geoffrey Roeder, Luke Metz, and Durk Kingma. On linear identifiability of learned representations. In *International Conference on Machine Learning*, pages 9030–9039. PMLR, 2021.

- 599 [94] Simon Buchholz, Michel Besserve, and Bernhard Schölkopf. Function classes for identi-  
600 fiable nonlinear independent component analysis. *Advances in Neural Information Processing*  
601 *Systems*, 35:16946–16961, 2022.
- 602 [95] Marco Fumero, Florian Wenzel, Luca Zancato, Alessandro Achille, Emanuele Rodolà, Ste-  
603 fano Soatto, Bernhard Schölkopf, and Francesco Locatello. Leveraging sparse and shared  
604 feature activations for disentangled representation learning. *Advances in Neural Information*  
605 *Processing Systems*, 36:27682–27698, 2023.
- 606 [96] Simon Bing, Jonas Wahl, Urmi Ninad, and Jakob Runge. Invariance & causal representation  
607 learning: Prospects and limitations. In *Causal Representation Learning Workshop at NeurIPS*  
608 *2023*, 2023.
- 609 [97] Goutham Rajendran, Simon Buchholz, Bryon Aragam, Bernhard Schölkopf, and Pradeep Ku-  
610 mar Ravikumar. From causal to concept-based representation learning. In *The Thirty-eighth*  
611 *Annual Conference on Neural Information Processing Systems*, 2024.
- 612 [98] Hikaru Shindo, Viktor Pfanschilling, Devendra Singh Dhami, and Kristian Kersting. (al-  
613 pha)ilp: thinking visual scenes as differentiable logic programs. *Machine Learning*, 112(5):  
614 1465–1497, 2023.
- 615 [99] Shaoqing Ren, Kaiming He, Ross Girshick, and Jian Sun. Faster r-cnn: Towards real-  
616 time object detection with region proposal networks. In C. Cortes, N. Lawrence, D. Lee,  
617 M. Sugiyama, and R. Garnett, editors, *Advances in Neural Information Processing Systems*,  
618 volume 28. Curran Associates, Inc., 2015. URL [https://proceedings.neurips.cc/  
619 paper\\_files/paper/2015/file/14bfa6bb14875e45bba028a21ed38046-Paper.pdf](https://proceedings.neurips.cc/paper_files/paper/2015/file/14bfa6bb14875e45bba028a21ed38046-Paper.pdf).
- 620 [100] Balaji Lakshminarayanan, Alexander Pritzel, and Charles Blundell. Simple and scalable pre-  
621 dictive uncertainty estimation using deep ensembles. *Advances in neural information pro-*  
622 *cessing systems*, 30, 2017.
- 623 [101] Diederik P Kingma. Adam: A method for stochastic optimization. *arXiv preprint*  
624 *arXiv:1412.6980*, 2014.
- 625 [102] Aaron Defazio and Samy Jelassi. Adaptivity without compromise: A momentumized,  
626 adaptive, dual averaged gradient method for stochastic optimization, 2021. URL [https:  
627 //arxiv.org/abs/2101.11075](https://arxiv.org/abs/2101.11075).
- 628 [103] Supratik Chakraborty, Kuldeep S. Meel, and Moshe Y. Vardi. Algorithmic improvements  
629 in approximate counting for probabilistic inference: From linear to logarithmic sat calls. In  
630 *IJCAI*, 2016.

## NeurIPS Paper Checklist

### 1. Claims

Question: Do the main claims made in the abstract and introduction accurately reflect the paper’s contributions and scope?

Answer: [\[Yes\]](#)

Justification: All the main claims made in the abstract and introduction accurately reflect the papers contributions and scope.

### 2. Limitations

Question: Does the paper discuss the limitations of the work performed by the authors?

Answer: [\[Yes\]](#)

Justification: The theory relies on assumptions [Assumption 3.1](#) and [Assumption 3.2](#), which are well established in the context of Reasoning Shortcuts. It also introduces a novel assumption, [Assumption 3.8](#), whose limitations are discussed in [Section 3](#) and which generally hold for the architectures considered in the experiments as shown in [Appendix E](#). Experimentally, the limitations of each supervision strategy are analyzed in [Section 4](#).

### 3. Theory assumptions and proofs

Question: For each theoretical result, does the paper provide the full set of assumptions and a complete (and correct) proof?

Answer: [\[Yes\]](#)

Justification: The proofs of all our theoretical results are included in [Appendix C](#)

### 4. Experimental result reproducibility

Question: Does the paper fully disclose all the information needed to reproduce the main experimental results of the paper to the extent that it affects the main claims and/or conclusions of the paper (regardless of whether the code and data are provided or not)?

Answer: [\[Yes\]](#)

Justification: The experimental details are discussed in [Section 5](#). The implementation details are also described in [Appendix A](#).

### 5. Open access to data and code

Question: Does the paper provide open access to the data and code, with sufficient instructions to faithfully reproduce the main experimental results, as described in supplemental material?

Answer: [\[Yes\]](#)

Justification: We will release an open-source implementation of our code upon paper acceptance. Reviewers can inspect the code in the supplementary materials.

### 6. Experimental setting/details

Question: Does the paper specify all the training and test details (e.g., data splits, hyperparameters, how they were chosen, type of optimizer, etc.) necessary to understand the results?

Answer: [\[Yes\]](#)

Justification: The training and test details are described in [Appendix A](#).

### 7. Experiment statistical significance

Question: Does the paper report error bars suitably and correctly defined or other appropriate information about the statistical significance of the experiments?

Answer: [\[Yes\]](#)

Justification: For each experiment in [Section 5](#), we report error bars, standard deviations or confidence intervals, depending on the table/plot. The same applies to [Appendix B](#).

### 8. Experiments compute resources

678 Question: For each experiment, does the paper provide sufficient information on the com-  
679 puter resources (type of compute workers, memory, time of execution) needed to reproduce  
680 the experiments?

681 Answer: [Yes]

682 Justification: All the information related to the computational resources is reported in Ap-  
683 pendix B.

684 **9. Code of ethics**

685 Question: Does the research conducted in the paper conform, in every respect, with the  
686 NeurIPS Code of Ethics <https://neurips.cc/public/EthicsGuidelines>?

687 Answer: [Yes]

688 Justification: The research conducted in the paper conforms with the NeurIPS Code of  
689 Ethics.

690 **10. Broader impacts**

691 Question: Does the paper discuss both potential positive societal impacts and negative  
692 societal impacts of the work performed?

693 Answer: [Yes]

694 Justification: We briefly discuss broader impact in Section 8.

695 **11. Safeguards**

696 Question: Does the paper describe safeguards that have been put in place for responsible  
697 release of data or models that have a high risk for misuse (e.g., pretrained language models,  
698 image generators, or scraped datasets)?

699 Answer: [NA]

700 Justification: The paper poses no such risks.

701 **12. Licenses for existing assets**

702 Question: Are the creators or original owners of assets (e.g., code, data, models), used in  
703 the paper, properly credited and are the license and terms of use explicitly mentioned and  
704 properly respected?

705 Answer: [Yes]

706 Justification: The authors of the datasets and pre-trained models used in this paper are  
707 properly cited in the main text, and all asset licenses have been respected.

708 **13. New assets**

709 Question: Are new assets introduced in the paper well documented and is the documenta-  
710 tion provided alongside the assets?

711 Answer: [NA]

712 Justification: The paper does not introduce new assets.

713 **14. Crowdsourcing and research with human subjects**

714 Question: For crowdsourcing experiments and research with human subjects, does the pa-  
715 per include the full text of instructions given to participants and screenshots, if applicable,  
716 as well as details about compensation (if any)?

717 Answer: [NA]

718 Justification: The paper does not involve crowd-sourcing experiments nor research involv-  
719 ing human subjects.

720 **15. Institutional review board (IRB) approvals or equivalent for research with human  
721 subjects**

722 Question: Does the paper describe potential risks incurred by study participants, whether  
723 such risks were disclosed to the subjects, and whether Institutional Review Board (IRB)  
724 approvals (or an equivalent approval/review based on the requirements of your country or  
725 institution) were obtained?

726 Answer: [NA]

727 Justification: The paper does not involve crowdsourcing nor research with human subjects.

728 **16. Declaration of LLM usage**

729 Question: Does the paper describe the usage of LLMs if it is an important, original, or  
730 non-standard component of the core methods in this research? Note that if the LLM is used  
731 only for writing, editing, or formatting purposes and does not impact the core methodology,  
732 scientific rigorousness, or originality of the research, declaration is not required.

733 Answer: [NA]

734 Justification: The core method development in this research does not involve LLMs as any  
735 important, original, or non-standard components.



## A Implementation Details

Here, we provide additional details about metrics, datasets, and models, for reproducibility. All the experiments were implemented using Python 3.9 and Pytorch 1.13 and run on one A100 GPU. The implementations of DPL, and the code for RSs mitigation strategies were taken verbatim from [17], while the code for DSL was taken from [49]. DPL\* and bears\* were implement on top of DSL codebase.

### A.1 Datasets

All data sets were generated using the rsbench library [20].

#### A.1.1 MNIST-Add

MNIST-Add [40] consists of pairs of MNIST digits [44], ranging from 0 to 9, and the goal is to predict their sum. The prior knowledge used for generating the labels is simply the rule of addition:  $K = (Y = C_1 + C_2)$ . This task does not admit RSs nor JRSs when digits are processed separately. The training and test examples take the following form:

$$\{((0, 1), 1), ((5, 8), 13), ((6, 6), 12), ((4, 1), 5)\} \quad (8)$$

All splits cover all possible pairs of concepts, from (0, 0) to (9, 9), i.e., there is no sampling bias. Overall, MNIST-Add has 42,000 training examples, 12,000 validation examples, and 6,000 test examples.

#### A.2 MNIST-SumParity

Similarly, in MNIST-SumParity the goal is to predict the *parity* of the sum, i.e., the prior knowledge is the rule:  $K = (Y = (C_1 + C_2) \bmod 2)$ . This task is more challenging for our purposes, as it is affected by both RSs and JRSs, cf. Fig. 1. Below we report four examples:

$$\{((0, 1), 1), ((5, 8), 1), ((6, 6), 0), ((4, 1), 1)\} \quad (9)$$

We consider two variants: like MNIST-Add, in MNIST-SumParity proper the training and test splits contain all possible combinations of digits, while in *biased* MNIST-SumParity the training set contains (even, even), (odd, odd) and (odd, even) pairs, while the test set contains (even, odd) pairs only. This fools CBMs into learning an incorrect inference layer implementing subtraction instead of addition-and-parity, as illustrated in Fig. 1. Both variants have the same number of training, validation, and test examples as MNIST-Add.

### A.3 Clevr

Clevr [82] consists of 3D scenes of simple objects rendered with Blender, see Fig. 4. Images are  $3 \times 128 \times 128$  and contain a variable number of objects. We consider only images with 2 to 4 objects each, primarily due to scalability issues with DPL. The ground-truth labels were computed by applying the rules (prior knowledge) proposed by [12], reported in Table 6. Objects are entirely determined by four concepts, namely shape, color, material, and size. We list all possible values in Table 5. Overall, Clevr has 6000 training examples, 1200 validation examples, and 1800 test examples.

| Property  | Value                                                    |
|-----------|----------------------------------------------------------|
| Shapes    | Cube, Sphere, Cylinder                                   |
| Colors    | Gray<br>Red, Blue, Green, Brown,<br>Purple, Cyan, Yellow |
| Materials | Rubber, Metal                                            |
| Sizes     | Large, Small                                             |

Table 5: Clevr properties.

| Class   | Condition                                                                                                                                                                           |
|---------|-------------------------------------------------------------------------------------------------------------------------------------------------------------------------------------|
| Class 1 | $\exists x_1 (\text{Cube}(x_1) \wedge \text{Large}(x_1))$<br>$\wedge \exists x_2 (\text{Cylinder}(x_2) \wedge \text{Large}(x_2))$                                                   |
| Class 2 | $\exists x_1 (\text{Cube}(x_1) \wedge \text{Small}(x_1) \wedge \text{Metal}(x_1))$<br>$\wedge \exists x_2 (\text{Sphere}(x_2) \wedge \text{Small}(x_2))$                            |
| Class 3 | $\exists x_1 (\text{Sphere}(x_1) \wedge \text{Large}(x_1) \wedge \text{Blue}(x_1))$<br>$\wedge \exists x_2 (\text{Sphere}(x_2) \wedge \text{Small}(x_2) \wedge \text{Yellow}(x_2))$ |

Table 6: Clevr classes.

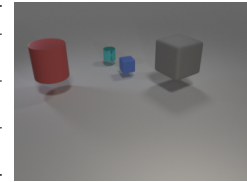

Figure 4: Example of Clevr data.

**Preprocessing.** All CBMs process objects separately, as follows. Following [98], we fine-tune a pretrained YoloV11 model [72] (for 10 epochs, random seed 13) on a subset of the training set’s

772 bounding boxes, and use it to predict bounding boxes for all images. For each training and test  
 773 image, we concatenate the regions in the bounding boxes, obtaining a list 2 to 4 images which plays  
 774 the role of input for our CBMs.

775 Each object has  $8 \times 3 \times 2 \times 2 = 96$  possible configurations of concept values, and we handle between  
 776 2 and 4 objects, hence the inference layer has to model  $96^2 + 96^3 + 96^4$  distinct possibilities. Due  
 777 to the astronomical number of possibilities (which would entail a huge truth table/inference layer  
 778 for DSL and related CBMs), we split the inference layer in two: we first predict individual concepts,  
 779 and then we aggregate them (into, e.g., `large-cube` and `small-yellow-sphere`) and use these  
 780 for prediction. Despite this simplification, Clevr still induces JRSs in learned CBMs.

#### 781 A.4 BDD-OIA

782 BDD-OIA is an autonomous driving dataset, composed of images extracted from driving scene  
 783 videos [83]. Each image is annotated with four binary labels: `move_forward`, `stop`, `turn_left`,  
 784 and `turn_right`. Each image comes with 21 binary concepts that constitute the explanations for  
 785 the corresponding actions. The training set contains almost 16k fully labeled frames, while the vali-  
 786 dation and test sets include almost 2k and 4.5k annotated samples, respectively. We adopt the same  
 787 prior knowledge used in [20], which we briefly summarize here for the sake of completeness.

788 For the `move_forward` and `stop` actions, the rules are as follows:

$$\left\{ \begin{array}{l} \text{red\_light} \Rightarrow \neg \text{green\_light} \\ \text{obstacle} = \text{car} \vee \text{person} \vee \text{rider} \vee \text{other\_obstacle} \\ \text{road\_clear} \iff \neg \text{obstacle} \\ \text{green\_light} \vee \text{follow} \vee \text{clear} \Rightarrow \text{move\_forward} \\ \text{red\_light} \vee \text{stop\_sign} \vee \text{obstacle} \Rightarrow \text{stop} \\ \text{stop} \Rightarrow \neg \text{move\_forward} \end{array} \right. \quad (10)$$

789 The rules for the `turn_left` and the `turn_right` action, instead, are:

$$\left\{ \begin{array}{l} \text{can\_turn} = \text{left\_lane} \vee \text{left\_green\_lane} \vee \text{left\_follow} \\ \text{cannot\_turn} = \text{no\_left\_lane} \vee \text{left\_obstacle} \vee \text{left\_solid\_line} \\ \text{can\_turn} \wedge \neg \text{cannot\_turn} \Rightarrow \text{turn\_left} \end{array} \right. \quad (11)$$

790 An overview of the classes of BDD-OIA can be found in [83].

791 **Preprocessing.** BDD-OIA images are preprocessed following the approach described in [25]. We  
 792 first used a Faster R-CNN [99] model pre-trained on MS-COCO and fine-tuned on BDD-100k, then  
 793 we extract 2048-dimensional features using a pre-trained convolutional layer from [25].

#### 794 A.5 Metrics

795 For all models, we report the metrics averaged over *five random seeds*.

796 **Label quality.** We measure the macro average  $F_1$ -score and Accuracy, to account for imbalance.

797 **Concept quality.** We compute concept quality via Accuracy and  $F_1$ -score. However, the order of  
 798 ground-truth and predicted concepts might differ, e.g., in Clevr  $G_1$  might represent whether  
 799 “color = red”, while  $C_1$  whether “color = blue”. Therefore, in order to compute these metrics we have  
 800 to first align them using the Hungarian matching algorithm using concept-wise Pearson correlation  
 801 on the test data [62]. The algorithm computes the correlation matrix  $R$  between  $\mathbf{g}$  and  $\mathbf{c}$ , i.e.,  $R_{ij} =$   
 802  $\text{corr}(G_i, C_j)$  where  $\text{corr}$  is the correlation coefficient, and then infers a permutation  $\pi$  between  
 803 concept values (e.g., mapping ground-truth color “red” to predicted value “blue”) that maximizes  
 804 the above objective. The metrics are computed by comparing the reordered ground-truth annotations  
 805 with the predicted concepts.

806 **Concept Collapse.** To compute the *Concept Collapse* metric  $\text{Cls}(C)$  [20], we follow the procedure  
 807 described in Bortolotti et al. [20], which we briefly describe here. Specifically, we extract a confu-  
 808 sion matrix in the multilabel setting by encoding each binary concept vector (e.g.,  $(0, 1, 1) \mapsto 3$ )

into a categorical label. Let  $\mathcal{C}^* \subseteq \{0, 1\}^k$  be the set of ground-truth concept vectors in the test set, and  $\mathcal{C}$  be the set of predicted concept vectors. After converting both sets to categorical values, denoted  $\mathcal{F}(\mathcal{C}^*)$  and  $\mathcal{F}(\mathcal{C})$  respectively, we construct the confusion matrix  $C \in [0, 1]^{m \times m}$ , where  $m = |\mathcal{F}(\mathcal{C}) \cup \mathcal{F}(\mathcal{C}^*)|$ . From this matrix, we compute the number of predicted categories  $p$  as:

$$p = \sum_{j=1}^m \mathbb{1}\{\exists i . C_{ij} > 0\} = |\mathcal{F}(\mathcal{C})| \quad (12)$$

Then, the  $\text{Cls}(\mathcal{C})$  metric is given by:

$$\text{Cls}(\mathcal{C}) = 1 - \frac{p}{m} \quad (13)$$

Where  $m = 2^k$ .

**Inference layer quality.** The same permutation is also used to assess knowledge quality. Specifically, we apply it to reorder the ground-truth concepts and then feed these to the learned inference layer, evaluating the accuracy and  $F_1$  score of the resulting predictions.

For MNIST-Add and MNIST-SumParity, we conducted an exhaustive evaluation since the number of possible combinations to supervise is 100. The results in Table 1 and Table 2 evaluate the knowledge exhaustively, whereas in Table 4, we separately assess the knowledge of in-distribution and out-of-distribution combinations.

In Clevr, as discussed in Appendix A.3, there are too many combinations of concept values to possibly evaluate them all. Therefore, both supervision and evaluation are performed by randomly sampling 100 combinations of ground-truth concepts. We follow the same procedure for BDD-0IA, except that we sample more combinations (2000) due to the larger space of possible concept configurations.

## A.6 Architectures

For MNIST-SumParity and MNIST-Add, We employed the architectures from [20], while for DSL, DPL\*, and bears\*, we followed the architecture described in [49]. For Clevr instead, we adopted the decoder presented in Table 7 and the encoder presented in Table 8. All models process different objects (e.g., digits) separately using the same backbone. For BDD-0IA, we adopt the architectures defined in [20].

Table 7: Encoder architecture for Clevr.

| INPUT          | LAYER TYPE        | PARAMETER                            | OUTPUT       |
|----------------|-------------------|--------------------------------------|--------------|
| (128, 128, 3)  | Convolution       | depth=32, kernel=3, stride=1, pad=1  | ReLU         |
| (128, 128, 32) | MaxPool2d         | kernel=2, stride=2                   |              |
| (64, 64, 32)   | Convolution       | depth=64, kernel=3, stride=1, pad=1  | ReLU         |
| (64, 64, 64)   | MaxPool2d         | kernel=2, stride=2                   |              |
| (64, 32, 32)   | Convolution       | depth=128, kernel=3, stride=1, pad=1 | ReLU         |
| (128, 32, 32)  | AdaptiveAvgPool2d | out=(1, 1)                           |              |
| (128, 1, 1)    | Flatten           |                                      |              |
| (128)          | Linear            | dim=40, bias = True                  | $\mathbf{c}$ |
| (128)          | Linear            | dim=640, bias = True                 | $\mu$        |
| (128)          | Linear            | dim=640, bias = True                 | $\sigma$     |

Table 8: Decoder architecture for Clevr

| INPUT         | LAYER TYPE      | PARAMETER                            | ACTIVATION |
|---------------|-----------------|--------------------------------------|------------|
| (255)         | Linear          | dim=32768, bias = True               |            |
| (8, 8, 512)   | ConvTranspose2d | depth=256, kernel=4, stride=2, pad=1 |            |
| (16, 16, 256) | BatchNorm2d     |                                      | ReLU       |
| (16, 16, 256) | ConvTranspose2d | depth=128, kernel=4, stride=2, pad=1 |            |
| (32, 32, 128) | BatchNorm2d     |                                      | ReLU       |
| (32, 32, 128) | ConvTranspose2d | depth=64, kernel=4, stride=2, pad=1  |            |
| (64, 64, 64)  | BatchNorm2d     |                                      | ReLU       |
| (64, 64, 64)  | ConvTranspose2d | depth=3, kernel=4, stride=2, pad=1   | Tanh       |

**Details of CBNM.** For Clevr, we used a standard linear layer. Since this is not expressive enough for MNIST-Add and MNIST-SumParity, we replaced it with an interpretable second-degree polynomial

layer, i.e., it associates weights to *combinations of two predicted digits* rather than individual digits. We also include a small entropy term, which empirically facilitates data fit when little or no concept supervision is available.

**Details of SENN.** SENN [1] are unsupervised concept-based models consisting of a neural network that produces a distribution over concepts, a neural network that assigns a score to those concepts, and a decoder. The final prediction is made by computing the dot product between the predicted concepts and their predicted scores. SENN by default includes a reconstruction penalty, a robustness loss, and a sparsity term.

In our implementation, we focus only on the reconstruction penalty. The robustness loss, which aims to make the relevance scores Lipschitz continuous, requires computing Jacobians, making the training of those models infeasible in terms of computational time and resources. Additionally, we did not implement the sparsity term, as it conflicts with the quality of concepts we aim to study.

**Details of bears\*.** bears\* combines DSL [49] and BEARS [81]. BEARS is a NeSy architectures based on deep ensembles [100], designed to improve the calibration of NeSy models in the presence of RSs and provide uncertainty estimation for concepts that may be affected by such RSs and it assumes to be given prior knowledge.

Since in our setup the inference layer is learned, we built an ensemble with one learnable inference layer as in DSL and multiple concept extractors. The first element of the ensemble learns both the concepts and the inference layer. Then, we freeze it and train the other concept extractors using the frozen inference layer for prediction. In this sense, bears\* provides awareness of the reasoning shortcuts present in the knowledge learned by the first model.

## A.7 Mitigation Strategies

**Concept supervision.** When evaluating mitigation strategies, concept supervision for MNIST-SumParity was incrementally supplied for two more concepts at each step, following this order: 3, 4, 1, 0, 2, 8, 9, 5, 6, 7. For Clevr, supervision was specifically provided for sizes, shapes, materials, and colors, in this order.

**Knowledge distillation.** This was implemented using a cross-entropy on the inference layer. For DSL and DPL, ground-truth concepts were fed into the learned truth table, expecting the correct label. Similarly, for CBNMs, which use a linear layer, the same approach was applied. In evaluating the mitigation strategies, we supervised all possible combinations for MNIST-Add, whereas for Clevr, we supervised a maximum of 500 randomly sampled combinations.

**Entropy maximization.** The entropy regularization term follows the implementation in [17]. The loss is defined as  $1 - \frac{1}{k} \sum_{i=1}^k H_{m_i}[p_\theta(c_i)]$  where  $p_\theta(C)$  represents the marginal distribution over the concepts, and  $H_{m_i}$  is the normalized Shannon entropy over  $m_i$  possible values of the distribution.

**Reconstruction.** The reconstruction penalty is the same as in [17]. In this case, the concept extractor outputs both concepts  $c$  and style variables  $z$ , i.e., it implements a distribution  $p_\theta(c, z | x) = p_\theta(c | x) \cdot p_\theta(z | x)$ . The reconstruction penalty is defined as:  $-\mathbb{E}_{(c,z) \sim p_\theta(c,z|x)} [\log p_\psi(x | c, z)]$  where  $p_\psi(x | c, z)$  represents the decoder network.

**Contrastive loss.** We implemented contrastive learning using the InfoNCE loss, comparing the predicted *concept distribution* of the current batch with that of its respective augmentations. Following the recommendations of Chen et al. [78], we applied the following augmentations to each batch: random cropping (20 pixels for MNIST and 125 pixels for Clevr), followed by resizing, color jittering, and Gaussian blur.

## A.8 Model Selection

**Optimization.** For DPL\*, bears\*, CBNM and SENN we used the Adam optimizer [101], while for DSL and DPL we achieved better results using the Madgrad optimizer [102].

**Hyperparameter search.** We performed an extensive grid search on the validation set over the following hyperparameters: (i) Learning rate ( $\gamma$ ) in  $\{1e-4, 1e-3, 1e-2\}$ ; (ii) Weight decay ( $\omega$ ) in  $\{0, 1e-4, 1e-3, 1e-2, 1e-1\}$ ; (iii) Reconstruction, contrastive loss, entropy loss, concept supervision loss and knowledge supervision loss weights ( $w_r, w_c, w_h, w_{csup}$  and  $w_k$ , respectively) in  $\{0.1, 1, 2, 5, 8,$

10}; (iv) Batch size ( $\nu$ ) in {32, 64, 128, 256, 512}. DSL and DPL\* have additional hyperparameters for the truth table:  $\varepsilon_{sym}$  and  $\varepsilon_{rul}$  for DSL, and  $\lambda_r$ , the truth table learning rate, for DPL\*.

All experiments were run for approximately 50 epochs for MNIST variants, 30 for BDD-OIA and 100 epochs for Clevr using early stopping based on validation set  $F_1(Y)$  performance. The exponential decay rate  $\beta$  was set to 0.99 for all experiments, as we empirically found it to provide the best performance across tasks. In all experiments, we selected  $\gamma = 1e - 3$ .

To answer the first research question in Section 5 on MNIST-Add, for DPL we used:  $\nu = 32$  and  $\omega = 0.0001$ ; for DSL:  $\nu = 128$ ,  $\omega = 0.001$ ,  $\varepsilon_{sym} = 0.2807344052335263$ , and  $\varepsilon_{rul} = 0.107711951632426$ ; for CBNM:  $\nu = 256$  and  $\omega = 0.0001$ ; for DPL\*:  $\nu = 32$ ,  $\omega = 0.01$ , and  $\lambda_r = 0.0001$ ; for SENN:  $\nu = 64$ ,  $\omega = 0.001$ , and  $w_r = 0.1$ ; while for bears\* we set the diversification loss term to 0 and the entropy term to 0.1. On MNIST-SumParity and its biased version, for DPL we used:  $\nu = 512$  and  $\omega = 0.0001$ ; for DSL:  $\nu = 128$ ,  $\omega = 0.0001$ ,  $\varepsilon_{sym} = 0.2807344052335263$ , and  $\varepsilon_{rul} = 0.107711951632426$ ; for CBNM:  $\nu = 256$  and  $\omega = 0.0001$ ; for DPL\*:  $\nu = 32$ ,  $\omega = 0.01$ , and  $\lambda_r = 0.01$ ; for SENN:  $\nu = 64$ ,  $\omega = 0.001$ , and  $w_r = 0.1$ ; while for bears\* we set the diversification loss term to 0.1 and the entropy term to 0.2. On Clevr, for DPL, CBNM, and DPL\*, we used  $\nu = 32$  and  $\omega = 0.001$ ; for DPL\*,  $\lambda_r = 0.001$ . On BDD-OIA, for DPL we used  $\nu = 128$  and  $\omega = 10^{-4}$ , while for CBNM we used  $\nu = 64$  and  $\omega = 0$ .

For the second research question, we performed a grid search for each mitigation strategy individually. Additionally, since our analysis focuses on optimal models, we trained multiple models and retained only those achieving optimal  $F_1(Y)$  performance on the validation set. For MNIST-SumParity, we set  $\nu = 128$ ,  $\omega = 0.001$ , and  $w_{csup} = 1$  across all experiments. For specific mitigation strategies, we used  $w_h = 1$  for entropy regularization,  $w_r = 0.01$  for reconstruction,  $w_c = 0.1$  for contrastive learning, and  $w_k = 1$  for knowledge supervision. For Clevr, we applied the same settings:  $\nu = 128$ ,  $\omega = 0.001$ , and  $w_{csup} = 1$  for all experiments. The specific mitigation strategy weights were set as follows:  $w_h = 1$  for entropy regularization,  $w_r = 1$  for reconstruction,  $w_c = 0.1$  for contrastive learning, and  $w_k = 1$  for knowledge supervision. When concept supervision is applied, we follow a sequential training approach as in [2]. During the initial epochs, the model learns only the concepts, and later, it jointly optimizes both the concepts and the label, as they are challenging to learn simultaneously.



## B Additional results

### B.1 Additional Results for Q1

Tables 9 to 11 report additional results for Q1 including two additional models and metrics. The additional models are: “CBNM noent”, which is identical to CBNM except it does not include any entropy term; and CBNM<sub>20</sub> which is a regular CBNM for which 20% of the concept combinations (e.g., pairs of digits in MNIST-based tasks) receive full supervision. The metrics include label accuracy Acc<sub>Y</sub>, concept accuracy Acc<sub>C</sub>, inference layer accuracy Acc( $\beta$ ), and negative log-likelihood, all evaluated on the test set.

Table 9: Complete results for MNIST-Add.

| METHOD                   | Acc <sub>Y</sub> | F <sub>1</sub> (Y) | Acc <sub>C</sub> | F <sub>1</sub> (C) | Cls(C) ( $\downarrow$ ) | F <sub>1</sub> ( $\beta$ ) | Acc( $\beta$ )  | NLL             |
|--------------------------|------------------|--------------------|------------------|--------------------|-------------------------|----------------------------|-----------------|-----------------|
| DPL                      | 0.98 $\pm$ 0.01  | 0.98 $\pm$ 0.01    | 0.99 $\pm$ 0.01  | 0.99 $\pm$ 0.01    | 0.01 $\pm$ 0.01         | —                          | —               | 0.17 $\pm$ 0.03 |
| CBNM                     | 0.98 $\pm$ 0.01  | 0.98 $\pm$ 0.01    | 0.99 $\pm$ 0.01  | 0.99 $\pm$ 0.01    | 0.01 $\pm$ 0.01         | 1.00 $\pm$ 0.01            | 1.00 $\pm$ 0.01 | 0.11 $\pm$ 0.01 |
| CBNM noent               | 0.98 $\pm$ 0.01  | 0.98 $\pm$ 0.01    | 0.80 $\pm$ 0.10  | 0.74 $\pm$ 0.13    | 0.08 $\pm$ 0.04         | 0.37 $\pm$ 0.09            | 0.42 $\pm$ 0.06 | 0.26 $\pm$ 0.01 |
| CBNM <sub>20</sub>       | 0.98 $\pm$ 0.01  | 0.98 $\pm$ 0.01    | 0.99 $\pm$ 0.01  | 0.99 $\pm$ 0.01    | 0.01 $\pm$ 0.01         | 0.67 $\pm$ 0.02            | 0.59 $\pm$ 0.02 | 0.70 $\pm$ 0.02 |
| CBNM <sub>20</sub> noent | 0.92 $\pm$ 0.02  | 0.94 $\pm$ 0.01    | 0.60 $\pm$ 0.09  | 0.48 $\pm$ 0.10    | 0.22 $\pm$ 0.12         | 0.02 $\pm$ 0.01            | 0.12 $\pm$ 0.02 | 1.09 $\pm$ 0.01 |
| DSL                      | 0.96 $\pm$ 0.02  | 0.96 $\pm$ 0.02    | 0.98 $\pm$ 0.01  | 0.98 $\pm$ 0.01    | 0.01 $\pm$ 0.01         | 1.00 $\pm$ 0.01            | 1.00 $\pm$ 0.01 | 0.38 $\pm$ 0.14 |
| DPL*                     | 0.90 $\pm$ 0.09  | 0.91 $\pm$ 0.09    | 0.93 $\pm$ 0.07  | 0.92 $\pm$ 0.08    | 0.01 $\pm$ 0.01         | 0.90 $\pm$ 0.08            | 0.90 $\pm$ 0.09 | 0.02 $\pm$ 0.01 |
| bears*                   | 0.81 $\pm$ 0.12  | 0.76 $\pm$ 0.15    | 0.87 $\pm$ 0.12  | 0.87 $\pm$ 0.13    | 0.01 $\pm$ 0.01         | 0.67 $\pm$ 0.14            | 0.65 $\pm$ 0.10 | 0.34 $\pm$ 0.22 |
| SENN                     | 0.97 $\pm$ 0.01  | 0.97 $\pm$ 0.01    | 0.84 $\pm$ 0.05  | 0.80 $\pm$ 0.07    | 0.01 $\pm$ 0.01         | 0.75 $\pm$ 0.08            | 0.75 $\pm$ 0.08 | 0.01 $\pm$ 0.01 |

Table 10: Complete results for MNIST-SumParity.

| METHOD     | Acc <sub>Y</sub> | F <sub>1</sub> (Y) | Acc <sub>C</sub> | F <sub>1</sub> (C) | Cls(C) ( $\downarrow$ ) | F <sub>1</sub> ( $\beta$ ) | Acc( $\beta$ )  | NLL             |
|------------|------------------|--------------------|------------------|--------------------|-------------------------|----------------------------|-----------------|-----------------|
| DPL        | 0.99 $\pm$ 0.01  | 0.99 $\pm$ 0.01    | 0.47 $\pm$ 0.04  | 0.43 $\pm$ 0.08    | 0.36 $\pm$ 0.15         | —                          | —               | 0.33 $\pm$ 0.01 |
| CBNM       | 0.90 $\pm$ 0.18  | 0.90 $\pm$ 0.18    | 0.21 $\pm$ 0.06  | 0.09 $\pm$ 0.03    | 0.66 $\pm$ 0.09         | 0.54 $\pm$ 0.04            | 0.21 $\pm$ 0.06 | 0.52 $\pm$ 1.04 |
| CBNM noent | 0.98 $\pm$ 0.01  | 0.98 $\pm$ 0.01    | 0.22 $\pm$ 0.01  | 0.08 $\pm$ 0.02    | 0.72 $\pm$ 0.13         | 0.53 $\pm$ 0.09            | 0.53 $\pm$ 0.09 | 0.07 $\pm$ 0.02 |
| DSL        | 0.94 $\pm$ 0.03  | 0.94 $\pm$ 0.03    | 0.20 $\pm$ 0.01  | 0.07 $\pm$ 0.01    | 0.80 $\pm$ 0.01         | 0.52 $\pm$ 0.01            | 0.51 $\pm$ 0.02 | 0.29 $\pm$ 0.16 |
| DPL*       | 0.99 $\pm$ 0.01  | 0.99 $\pm$ 0.01    | 0.22 $\pm$ 0.01  | 0.07 $\pm$ 0.01    | 0.80 $\pm$ 0.01         | 0.50 $\pm$ 0.05            | 0.50 $\pm$ 0.06 | 0.06 $\pm$ 0.01 |
| bears*     | 0.99 $\pm$ 0.01  | 0.99 $\pm$ 0.01    | 0.28 $\pm$ 0.05  | 0.30 $\pm$ 0.03    | 0.22 $\pm$ 0.04         | 0.36 $\pm$ 0.09            | 0.37 $\pm$ 0.09 | 0.04 $\pm$ 0.01 |
| SENN       | 0.99 $\pm$ 0.01  | 0.99 $\pm$ 0.01    | 0.53 $\pm$ 0.05  | 0.49 $\pm$ 0.05    | 0.01 $\pm$ 0.01         | 0.53 $\pm$ 0.06            | 0.53 $\pm$ 0.06 | 0.01 $\pm$ 0.01 |

Table 11: Complete Results for MNIST-SumParity biased.

| METHOD                   | Acc <sub>Y</sub> | F <sub>1</sub> (Y) | Acc <sub>C</sub> | F <sub>1</sub> (C) | Cls(C) ( $\downarrow$ ) | F <sub>1</sub> ( $\beta$ ) | Acc( $\beta$ )  | NLL             |
|--------------------------|------------------|--------------------|------------------|--------------------|-------------------------|----------------------------|-----------------|-----------------|
| DPL                      | 0.99 $\pm$ 0.01  | 0.99 $\pm$ 0.01    | 0.65 $\pm$ 0.05  | 0.59 $\pm$ 0.06    | 0.08 $\pm$ 0.07         | —                          | —               | 0.06 $\pm$ 0.01 |
| CBNM noent               | 0.99 $\pm$ 0.01  | 0.99 $\pm$ 0.01    | 0.22 $\pm$ 0.01  | 0.08 $\pm$ 0.02    | 0.76 $\pm$ 0.06         | 0.52 $\pm$ 0.04            | 0.52 $\pm$ 0.04 | 0.05 $\pm$ 0.01 |
| CBNM <sub>20</sub>       | 0.99 $\pm$ 0.01  | 0.99 $\pm$ 0.01    | 0.21 $\pm$ 0.01  | 0.07 $\pm$ 0.01    | 0.80 $\pm$ 0.01         | 0.51 $\pm$ 0.01            | 0.52 $\pm$ 0.01 | 0.07 $\pm$ 0.04 |
| CBNM <sub>20</sub> noent | 0.99 $\pm$ 0.01  | 0.99 $\pm$ 0.01    | 0.22 $\pm$ 0.01  | 0.07 $\pm$ 0.01    | 0.80 $\pm$ 0.01         | 0.49 $\pm$ 0.04            | 0.48 $\pm$ 0.04 | 0.04 $\pm$ 0.01 |
| DSL                      | 0.94 $\pm$ 0.03  | 0.94 $\pm$ 0.03    | 0.20 $\pm$ 0.01  | 0.07 $\pm$ 0.01    | 0.80 $\pm$ 0.01         | 0.02 $\pm$ 0.01            | 0.09 $\pm$ 0.02 | 0.29 $\pm$ 0.16 |
| bears*                   | 0.99 $\pm$ 0.01  | 0.99 $\pm$ 0.01    | 0.20 $\pm$ 0.01  | 0.07 $\pm$ 0.01    | 0.78 $\pm$ 0.04         | 0.48 $\pm$ 0.04            | 0.49 $\pm$ 0.04 | 0.03 $\pm$ 0.01 |

### B.2 Additional Results for Q1: The BDD-OIA Task

**Experimental setup.** BDD-OIA is a challenging real-world learning task with 21 binary concepts and, unlike in Clevr, these cannot be decomposed into unary predicates. Moreover, each concept cannot be separately assigned to individual actions as done for DPL in [20], as this would introduce a negative bias in the learned solutions, effectively forcing the model to use a fixed concept budget per action without interference. *Due to scalability constraints, we compared only DPL and CBNM, as implementing DSL or DPL\* would require allocating at least four tensors of size  $2^{21}$ , which exceeds our available computational resources.*

**Results.** The results for DPL and CBNM are reported in Table 12. Both competitors perform sub-optimally on BDD-OIA, as expected given the challenging nature of this task: DPL scores around 70%  $F_1(Y)$  while CBNM only 62%. Perhaps surprising, CBNM does not collapse concepts together and tends to use most of the concept bottleneck across the test set ( $\text{Cls}(C) \approx 0.06$ ). Despite the lack of collapse, both architectures are far from attaining the intended semantics, with  $F_1(C)$  scores of 44% for DPL and 43% for CBNM. Additionally, CBNM deviates from the ground-truth knowledge, achieving a low  $F_1(\beta)$  of around 42%. The low collapse for CBNM may be due to the trained model

being far from optimal. We hypothesize that adding a sparsity penalty to the linear layer of CBNM would substantially increase concept collapse, but we leave a detailed examination to future work.

Table 12: Results for BDD-OIA.

| METHOD | $F_1(Y)$ ( $\uparrow$ ) | $F_1(C)$ ( $\uparrow$ ) | $Cls(C)$ ( $\downarrow$ ) | $F_1(\beta)$ ( $\uparrow$ ) |
|--------|-------------------------|-------------------------|---------------------------|-----------------------------|
| DPL    | $0.69 \pm 0.03$         | $0.44 \pm 0.01$         | $0.88 \pm 0.01$           | —                           |
| CBNM   | $0.62 \pm 0.03$         | $0.43 \pm 0.02$         | $0.06 \pm 0.02$           | $0.42 \pm 0.03$             |

### B.3 Additional Results for Q3

Here we show the effect of traditional mitigation strategies on MNIST-SumParity and Clevr as concept and knowledge supervision increase. As discussed in Section 5, traditional strategies have limited impact, with the exception of concept supervision.

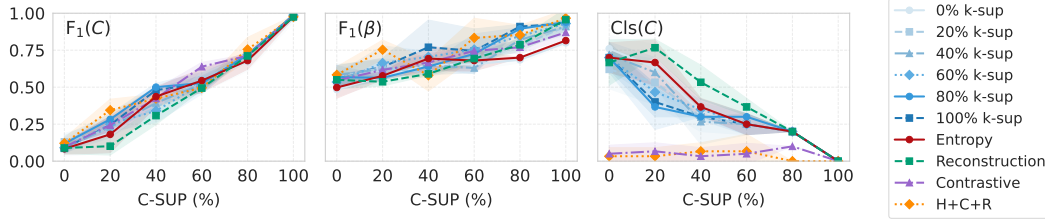

Figure 5: Fig. 3 with standard deviation over 5 seeds

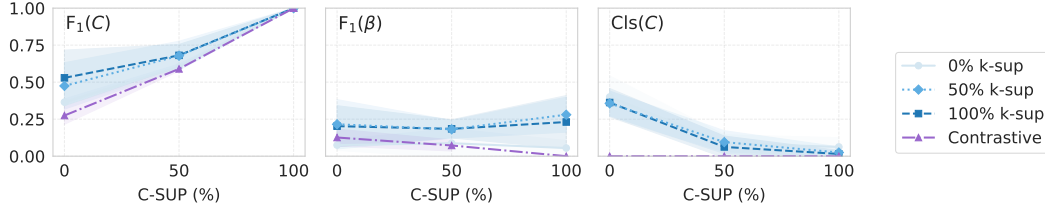

Figure 6: Effect of standard mitigation strategies evaluated for CBNM on Clevr, with standard deviation over 5 seeds. We evaluated only the contrastive strategy as it performed best. Since supervising all knowledge is infeasible, we observe that for sampled configurations (leading to out-of-distribution settings), the learned knowledge does not generalize.

### B.4 Concept Confusion Matrices and Learned Inference Layers

Here, we present the concept and knowledge confusion matrices for different datasets and models to show examples of joint reasoning shortcut solutions that they learn.

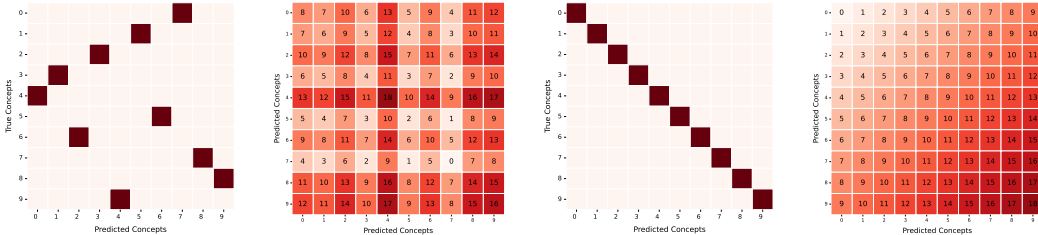

Figure 7: Concept confusion matrices for CBNM on MNIST-Add and the corresponding learned inference layer. Left two matrices: concepts and knowledge before alignment. Right two matrices: same but after alignment. The learned inference layer is visualized as a colored matrix where the numbers in the cells indicate the model’s predictions.

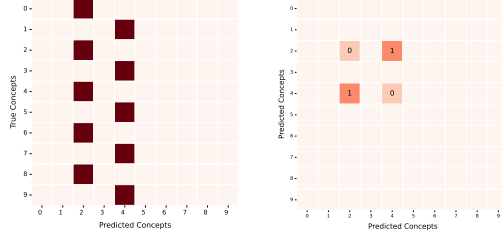

Figure 8: Concepts and inference layer learned by CBNM on MNIST-SumParity before (two left) and after (two right) the post-hoc alignment step. For concepts, we report the confusion matrix. For the inference layer, we visualize the learned operation as a truth table: numbers within cells indicate the label predicted for each combination of predicted digits.

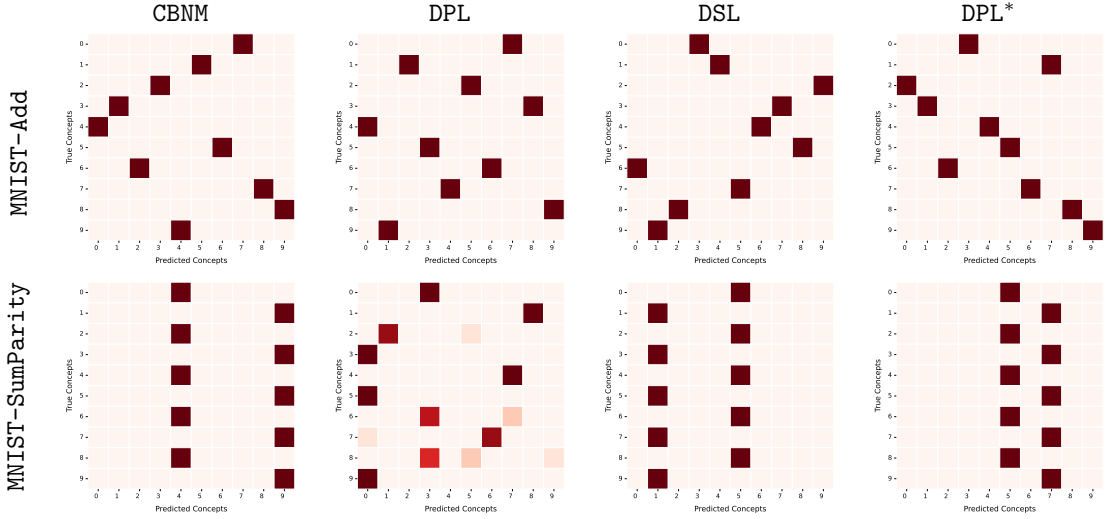

Figure 9: **Concept confusion matrices** for MNIST-SumParity. All models tend to favor  $\alpha$ 's that collapse concepts together, hinting at *simplicity bias*.

## 946 B.5 Number of Reasoning Shortcuts and Joint Reasoning Shortcuts

947 Here, we report the approximate number of deterministic reasoning shortcuts and joint reasoning  
 948 shortcuts for MNIST-Add and MNIST-SumParity. We obtained these numbers by extending the  
 949 count-rss software included in rsbench [20] to the enumeration of JRSs, compatibly with Eq. (7)  
 950 and Eq. (6).

951 We considered downsized versions of both MNIST-Add and MNIST-SumParity, with input digits  
 952 restricted to the range  $\{0, \dots, N\}$ , and resorted to the approximate model counter approxMC [103]  
 953 for obtaining approximate counts in the hardest cases. All counts assume object independence is in  
 954 place (i.e., that the two input digits are processed separately), for simplicity. The situation is similar  
 955 when this is not the case, except that the all counts grow proportionally.

956 The number of RSs and JRSs for increasing  $N$  are reported in Table 13. Specifically, the #RSs  
 957 column indicates the number of regular RSs obtained by fixing the prior knowledge (that is, assum-  
 958 ing  $\beta = \beta^*$ ) and matches the count in [17] for the same tasks. The #JRSs columns refer to the  
 959 CBM case, where the inference layer is learned from data (i.e.,  $\beta$  might not match  $\beta^*$ ). We report  
 960 two distinct counts for JRSs: one assumes that  $\beta$ 's that match on all concepts actively output by  $\alpha$   
 961 should be considered identical despite possible differences on “inactive” concepts that  $\alpha$  predicts as  
 962 constant (#JRSs non-redundant) or not (# JRSs).

963 As can be seen from the results, JRSs quickly outnumber regular RSs as  $N$  grows, as anticipated in  
 964 Section 3.1. This suggests that, as expected, learning CBMs with intended semantics by optimizing  
 965 label likelihood is more challenging when prior knowledge is not given *a priori*.

Table 13: Number of RSs vs. JRSs in MNIST-SumParity.

| $N$ | #RSs                          | #JRSs                            | #JRSs (non-redundant)         |
|-----|-------------------------------|----------------------------------|-------------------------------|
| 3   | $(1.10 \pm 0.00) \times 10^1$ | $(3.84 \pm 0.60) \times 10^2$    | $(1.20 \pm 0.00) \times 10^1$ |
| 4   | $(6.30 \pm 0.00) \times 10^1$ | $(1.11 \pm 0.05) \times 10^5$    | $(1.27 \pm 0.06) \times 10^2$ |
| 5   | $(3.70 \pm 0.15) \times 10^2$ | $(1.16 \pm 0.05) \times 10^8$    | $(1.40 \pm 0.70) \times 10^3$ |
| 6   | $(2.98 \pm 0.10) \times 10^3$ | $(4.45 \pm 0.19) \times 10^{11}$ | $(1.74 \pm 0.13) \times 10^4$ |
| 7   | $(2.56 \pm 0.26) \times 10^4$ | $(8.08 \pm 0.33) \times 10^{15}$ | $(2.61 \pm 0.14) \times 10^5$ |
| 8   | $(2.62 \pm 0.15) \times 10^5$ | $(5.39 \pm 0.25) \times 10^{20}$ | $(4.21 \pm 0.10) \times 10^6$ |

## C Theoretical Material

In this section, we start by summarizing the prerequisite material. We begin by recalling a central Lemma proven in [17] that allows us to write the condition for likelihood-optimal models in terms of  $\alpha$ . For ease of comparison, let  $p(\mathbf{C} \mid \mathbf{X}) := \mathbf{f}(\mathbf{X})$  and  $p(\mathbf{Y} \mid \mathbf{X}) := (\omega \circ \mathbf{f})(\mathbf{X})$  denote the conditional distributions defined by the CBM  $(\mathbf{f}, \omega) \in \mathcal{F} \times \Omega$ , and:

$$p(\mathbf{Y} \mid \mathbf{G}) := \mathbb{E}_{\mathbf{x} \sim p^*(\mathbf{X} \mid \mathbf{G})} [p(\mathbf{Y} \mid \mathbf{x})] \quad (14)$$

Also, we consider the following joint distributions:

$$p^*(\mathbf{X}, \mathbf{Y}) = p^*(\mathbf{Y} \mid \mathbf{X})p^*(\mathbf{X}), \quad p(\mathbf{X}, \mathbf{Y}) = p(\mathbf{Y} \mid \mathbf{X})p^*(\mathbf{X}) \quad (15)$$

**Lemma C.1** ([17]). *It holds that: (i) The true risk of  $p$  can be upper bounded as follows:*

$$\mathbb{E}_{(\mathbf{x}, \mathbf{y}) \sim p^*(\mathbf{X}, \mathbf{Y})} [\log p(\mathbf{y} \mid \mathbf{x})] = -\text{KL}[p^*(\mathbf{X}; \mathbf{Y}) \parallel p(\mathbf{X}, \mathbf{Y})] - H[p^*(\mathbf{X}, \mathbf{Y})] \quad (16)$$

$$\leq \mathbb{E}_{\mathbf{g} \sim p(\mathbf{G})} (-\text{KL}[p^*(\mathbf{Y} \mid \mathbf{g}; \mathbf{K}) \parallel p(\mathbf{Y} \mid \mathbf{g})] - H[p^*(\mathbf{Y} \mid \mathbf{g}; \mathbf{K})]) \quad (17)$$

where KL is the Kullback-Leibler divergence and  $H$  is the Shannon entropy. Moreover, under **Assumptions 3.1** and **3.2**,  $p(\mathbf{Y} \mid \mathbf{X}; \mathbf{K})$  is an optimum of the LHS of Eq. (17) if and only if  $p(\mathbf{Y} \mid \mathbf{G})$  is an optimum of the RHS. (ii) There exists a bijection between the deterministic concept distributions  $p(\mathbf{C} \mid \mathbf{X})$  that, for each  $\mathbf{g} \in \text{supp}(\mathbf{G})$ , are constant over the support of  $p^*(\mathbf{X} \mid \mathbf{g})$  apart for zero-measure subspaces  $\mathcal{X}^0 \subset \text{supp}(p^*(\mathbf{X} \mid \mathbf{g}))$  and the deterministic distributions of the form  $p(\mathbf{C} \mid \mathbf{G})$ .

Point (i) connects the optima of the likelihood  $p(\mathbf{Y} \mid \mathbf{X})$  and the optima of  $p(\mathbf{Y} \mid \mathbf{G})$ . This implies that, under **Assumptions 3.1** and **3.2**, knowing the optima of  $p(\mathbf{Y} \mid \mathbf{G})$  informs us about optimal CBMs  $p(\mathbf{Y} \mid \mathbf{X})$ . Notice that a single  $\alpha(\mathbf{G}) = p(\mathbf{C} \mid \mathbf{G})$  might correspond to multiple choices of  $\mathbf{f} \in \mathcal{F}$ . However, by (ii), if we restrict ourselves to deterministic distributions  $p(\mathbf{C} \mid \mathbf{G})$ , the correspondence with distributions  $p(\mathbf{C} \mid \mathbf{X})$  that are almost constant in the support becomes one-to-one.

Next, we describe which distributions  $p(\mathbf{Y} \mid \mathbf{G})$  are both deterministic – and thus comply with (ii) – and optimal.

**Lemma C.2** (Deterministic optima of the likelihood). *Under **Assumptions 3.1** and **3.2**, for all CBMs  $(\mathbf{f}, \omega) \in \mathcal{F} \times \Omega$  where, for all  $\mathbf{g} \in \mathcal{G}$ ,  $\mathbf{f} : \mathbf{x} \mapsto \mathbf{c}$  is constant over the support of  $p^*(\mathbf{X} \mid \mathbf{g})$  apart for a zero-measure subspace  $\mathcal{X}^0 \subset \text{supp}(p^*(\mathbf{X} \mid \mathbf{g}))$ , it holds that the optima of the likelihood for  $p(\mathbf{Y} \mid \mathbf{G})$  are obtained when:*

$$\forall \mathbf{g} \in \text{supp}(p^*(\mathbf{G})), (\beta \circ \alpha)(\mathbf{g}) = \beta^*(\mathbf{g}) \quad (18)$$

Here,  $\alpha(\mathbf{g}) := \mathbb{E}_{\mathbf{x} \sim p^*(\mathbf{X} \mid \mathbf{g})} [\mathbf{f}(\mathbf{x})] \in \text{Vert}(\mathcal{A})$  and  $\beta(\mathbf{c}) := \omega(\mathbb{1}\{\mathbf{C} = \mathbf{c}\}) \in \text{Vert}(\mathcal{B})$ .

*Proof.* Notice that by **Lemma C.1**, it holds that  $\alpha \in \text{Vert}(\mathcal{A})$  is a deterministic conditional distribution. Since  $\mathbf{f} : \mathbf{x} \rightarrow \mathbf{c}$  is constant over all  $\mathbf{x} \sim p^*(\mathbf{X} \mid \mathbf{g})$  for a fixed  $\mathbf{g} \in \mathcal{G}$ , it holds that  $\mathbf{f}(\mathbf{x}) = \alpha(\mathbf{g})$  apart for some  $\mathbf{x}$  in a measure-zero subspace  $\mathcal{X}^0 \subset \text{supp}(p^*(\mathbf{X} \mid \mathbf{g}))$ . Therefore we get:

$$\mathbb{E}_{\mathbf{x} \sim p^*(\mathbf{X} \mid \mathbf{g})} [\omega(\mathbf{f}(\mathbf{x}))] = \omega(\alpha(\mathbf{g})) = (\beta \circ \alpha)(\mathbf{g}) \quad (19)$$

995 In the last line, we substitute  $\omega$  with  $\beta$  since  $\alpha$  is deterministic. For  $p(\mathbf{Y} \mid \mathbf{G})$ , the necessary and  
 996 sufficient condition for maximum log-likelihood is:

$$\forall \mathbf{g} \in \text{supp}(p^*(\mathbf{G})), p(\mathbf{Y} \mid \mathbf{g}) = \beta^*(\mathbf{g}) \quad (20)$$

997 and substituting Eq. (19) we get:

$$\forall \mathbf{g} \in \text{supp}(p^*(\mathbf{G})), (\beta \circ \alpha)(\mathbf{g}) = \beta^*(\mathbf{g}) \quad (21)$$

998 This proves the claim.  $\square$

### 999 C.1 Equivalence relation given by Definition 3.3

1000 We start by proving that Definition 3.3 defines an equivalence relation.

1001 **Proposition C.3.** *Definition 3.3 defines an equivalence relation  $\sim$  between pairs  $(\alpha, \beta), (\alpha', \beta') \in$   
 1002  $\mathcal{A} \times \mathcal{B}$ , as follows:  $(\alpha, \beta) \sim (\alpha', \beta')$  iff there exist a permutation  $\pi : [k] \rightarrow [k]$  and  $k$  element-wise  
 1003 invertible functions  $\psi_1, \dots, \psi_k$  such that:*

$$\forall \mathbf{g} \in \mathcal{G}, \alpha(\mathbf{g}) = (\mathbf{P}_\pi \circ \psi \circ \alpha')(\mathbf{g}) \quad (22)$$

$$\forall \mathbf{c} \in \mathcal{C}, \beta(\mathbf{c}) = (\beta' \circ \psi^{-1} \circ \mathbf{P}_\pi^{-1})(\mathbf{c}) \quad (23)$$

1004 where  $\mathbf{P}_\pi : \mathcal{C} \rightarrow \mathcal{C}$  is the permutation matrix induced by  $\pi$  and  $\psi(\mathbf{c}) := (\psi_1(c_1), \dots, \psi_k(c_k))$ .

1005 *Proof.* It is useful to analyze how  $\mathbf{P}_\pi$  and  $\psi$  are related. Let for any  $\mathbf{c} \in \mathcal{C}$ :

$$(\mathbf{P}_\pi \circ \psi)(\mathbf{c}) = \mathbf{P}_\pi(\psi_1(c_1), \dots, \psi_k(c_k)) \quad (24)$$

$$= (\psi_{\pi(1)}(c_{\pi(1)}), \dots, \psi_{\pi(k)}(c_{\pi(k)})) \quad (25)$$

1006 Using the shorthand  $\psi_\pi(\mathbf{c}) := (\psi_{\pi(1)}(c_1), \dots, \psi_{\pi(k)}(c_k))$ , we have that:

$$(\mathbf{P}_\pi \circ \psi)(\mathbf{c}) = (\psi_\pi \circ \mathbf{P}_\pi)(\mathbf{c}) \quad (26)$$

1007 From this expression, notice that for all  $\mathbf{c} \in \mathcal{C}$  it holds that:

$$(\mathbf{P}_\pi \circ \psi)(\mathbf{c}) = (\mathbf{P}_\pi \circ \psi \circ \mathbf{P}_\pi^{-1} \circ \mathbf{P}_\pi)(\mathbf{c}) \quad (27)$$

$$(\psi_\pi \circ \mathbf{P}_\pi)(\mathbf{c}) = ((\mathbf{P}_\pi \circ \psi \circ \mathbf{P}_\pi^{-1}) \circ \mathbf{P}_\pi)(\mathbf{c}) \quad (28)$$

1008 so that we can equivalently write  $\psi_\pi := \mathbf{P}_\pi \circ \psi \circ \mathbf{P}_\pi^{-1}$ .

1009 **Reflexivity.** This follows by choosing  $\mathbf{P}_\pi = \text{id}$  and similarly  $\psi_i = \text{id}$  for all  $i \in [k]$ .

1010 **Symmetry.** We have to prove that  $(\alpha, \beta) \sim (\alpha', \beta') \implies (\alpha', \beta') \sim (\alpha, \beta)$ . Since  $(\alpha, \beta) \sim$   
 1011  $(\alpha', \beta')$ , we can write  $\alpha$  in terms of  $\alpha'$  as follows:

$$\alpha(\mathbf{g}) = (\mathbf{P}_\pi \circ \psi \circ \alpha')(\mathbf{g}) \quad (29)$$

$$= (\psi_\pi \circ \mathbf{P}_\pi \circ \alpha')(\mathbf{g}) \quad (30)$$

1012 where in the last step we used Eq. (26). By first inverting  $\psi_\pi$  and then  $\mathbf{P}_\pi$ , we obtain that:

$$\alpha'(\mathbf{g}) = (\mathbf{P}_\pi^{-1} \circ \psi_\pi^{-1} \circ \alpha)(\mathbf{g}) \quad (31)$$

1013 The inverses exist by construction/definition. Showing the symmetry of  $\alpha$ . With similar steps, we  
 1014 can show that a similar relation also holds for  $\beta'$ , that is for all  $\mathbf{c} \in \mathcal{C}$ :

$$\beta'(\mathbf{c}) = (\beta \circ \psi_\pi \circ \mathbf{P}_\pi)(\mathbf{c}) \quad (32)$$

1015 **Transitivity.** We have to prove that if  $(\alpha, \beta) \sim (\alpha', \beta')$  and  $(\alpha', \beta') \sim (\alpha^\dagger, \beta^\dagger)$  then also  $(\alpha, \beta) \sim$   
 1016  $(\alpha^\dagger, \beta^\dagger)$ . We start from the expression of  $\alpha$  and  $\alpha'$ , where we have that  $\forall \mathbf{g} \in \mathcal{G}$ :

$$\alpha(\mathbf{g}) = (\mathbf{P}_\pi \circ \psi \circ \alpha')(\mathbf{g}) \quad (33)$$

$$\alpha'(\mathbf{g}) = (\mathbf{P}_{\pi'} \circ \psi' \circ \alpha^\dagger)(\mathbf{g}) \quad (34)$$



1017 We proceed by substituting the expression of  $\alpha'$  in  $\alpha$  to obtain:

$$\begin{aligned}
\alpha(\mathbf{g}) &= (\mathbf{P}_\pi \circ \psi \circ \mathbf{P}_{\pi'} \circ \psi' \circ \alpha^\dagger)(\mathbf{g}) \\
&= (\mathbf{P}_\pi \circ \mathbf{P}_{\pi'} \circ \mathbf{P}_{\pi'}^{-1} \circ \psi \circ \mathbf{P}_{\pi'} \circ \psi' \circ \alpha^\dagger)(\mathbf{g}) \\
&\quad \text{(Composing } \mathbf{P}_\pi \text{ with the identity } \mathbf{P}_{\pi'} \circ \mathbf{P}_{\pi'}^{-1}) \\
&= (\mathbf{P}_\pi \circ \mathbf{P}_{\pi'} \circ \psi_{\pi'-1} \circ \psi' \circ \alpha^\dagger)(\mathbf{g}) \quad \text{(Using that } \psi_{\pi'-1} := \mathbf{P}_{\pi'}^{-1} \circ \psi \circ \mathbf{P}_{\pi'}.) \\
&= (\mathbf{P}_{\pi^\dagger} \circ \psi^\dagger \circ \alpha^\dagger)(\mathbf{g})
\end{aligned} \tag{35}$$

1018 where we defined  $\mathbf{P}_{\pi^\dagger} := \mathbf{P}_\pi \circ \mathbf{P}_{\pi'}$  and  $\psi^\dagger := \psi_{\pi'-1} \circ \psi'$ . With similar steps, we obtain that  $\beta$   
1019 can be related to  $\beta^\dagger$  as:

$$\beta(\mathbf{c}) = (\beta^\dagger \circ \psi^{\dagger-1} \circ \mathbf{P}_{\pi^\dagger}^{-1})(\mathbf{c}) \tag{37}$$

1020 for all  $\mathbf{c} \in \mathcal{C}$ . This shows the equivalence relation of [Definition 3.3](#).  $\square$

1021 We now prove how solutions with intended semantics ([Definition 3.3](#)) relate to the optima of the  
1022 log-likelihood:

1023 **Lemma C.4** (Intended semantics entails optimal models). *If a pair  $(\alpha, \beta) \in \mathcal{A} \times \mathcal{B}$  possesses the*  
1024 *intended semantics ([Definition 3.3](#)), it holds that:*

$$\forall \mathbf{g} \in \mathcal{G}, (\beta \circ \alpha)(\mathbf{g}) = \beta^*(\mathbf{g}) \tag{38}$$

1025 *Proof.* By [Definition 3.3](#), we can write:

$$\alpha(\mathbf{g}) = (\mathbf{P}_\pi \circ \psi \circ \text{id})(\mathbf{g}) \tag{39}$$

$$\beta(\mathbf{c}) = (\beta^* \circ \psi^{-1} \circ \mathbf{P}_\pi^{-1})(\mathbf{c}) \tag{40}$$

1026 Combining [Eqs. \(39\) and \(40\)](#), we get, for all  $\mathbf{g} \in \mathcal{G}$ , that:

$$(\beta \circ \alpha)(\mathbf{g}) = (\beta^* \circ \mathbf{P}_\pi^{-1} \circ \psi^{-1} \circ \psi \circ \mathbf{P}_\pi)(\mathbf{g}) \tag{41}$$

$$= (\beta^* \circ \mathbf{P}_\pi^{-1} \circ \mathbf{P}_\pi)(\mathbf{g}) \tag{42}$$

$$= \beta^*(\mathbf{g}) \tag{43}$$

1027 yielding the claim.  $\square$

## 1028 C.2 Proof of Theorem 3.6 and Corollary 3.7

1029 **Theorem C.5.** *Let  $s\mathcal{G} := \bigcup_{i=1}^k \{|\mathcal{G}_i|\}$  be the set of cardinalities of each concept  $G_i \subseteq \mathbf{G}$  and  $ms\mathcal{G}$   
1030 denote the multi-set  $ms\mathcal{G} := \{(|\mathcal{G}_i|, m(|\mathcal{G}_i|)), i \in [k]\}$ , where  $m(\bullet)$  denotes the multiplicity of  
1031 each element of  $s\mathcal{G}$ . Under [Assumptions 3.1 and 3.2](#), the number of deterministic JRSs  $(\alpha, \beta) \in$   
1032  $\text{Vert}(\mathcal{A}) \times \text{Vert}(\mathcal{B})$  amounts to:*

$$\sum_{(\alpha, \beta) \in \text{Vert}(\mathcal{A}) \times \text{Vert}(\mathcal{B})} \mathbb{1}\left\{ \bigwedge_{\mathbf{g} \in \text{supp}(\mathbf{G})} (\beta \circ \alpha)(\mathbf{g}) = \beta^*(\mathbf{g}) \right\} - C[\mathcal{G}] \tag{44}$$

1033 where  $C[\mathcal{G}]$  is the total number of pairs with the intended semantics, given by  $C[\mathcal{G}] :=$   
1034  $\prod_{\xi \in s\mathcal{G}} m(\xi)! \times \prod_{i=1}^k |\mathcal{G}_i|!$ .

1035 *Proof.* Since we are considering pairs  $(\alpha, \beta) \in \text{Vert}(\mathcal{A}) \times \text{Vert}(\mathcal{B})$ ,  $\alpha$  defines a (deterministic)  
1036 function  $\alpha : \mathcal{G} \rightarrow \mathcal{C}$  and that, similarly,  $\beta$  defines a (deterministic) function  $\beta : \mathcal{C} \rightarrow \mathcal{Y}$ . In this  
1037 case,  $\beta \circ \alpha : \mathcal{G} \rightarrow \mathcal{Y}$  is a map from ground-truth concepts to labels. We start by [Definition 3.3](#) and  
1038 consider the pairs that attain maximum likelihood by [Lemma C.2](#):

$$\forall \mathbf{g} \in \text{supp}(p^*(\mathbf{G})), (\beta \circ \alpha)(\mathbf{g}) = \beta^*(\mathbf{g}) \tag{45}$$

1039 Since  $\alpha \in \text{Vert}(\mathcal{A})$  is deterministic, we can replace  $\omega$  with  $\beta$ . Since both  $\text{Vert}(\mathcal{A})$  and  $\text{Vert}(\mathcal{B})$  are  
1040 countable, we can count the number of pairs that attain maximum likelihood as follows:

$$\sum_{(\alpha, \beta) \in \text{Vert}(\mathcal{A}) \times \text{Vert}(\mathcal{B})} \mathbb{1}\left\{ \bigwedge_{\mathbf{g} \in \text{supp}(p^*(\mathbf{G}))} (\beta \circ \alpha)(\mathbf{g}) = \beta^*(\mathbf{g}) \right\} \tag{46}$$

1041 where, for each pair  $(\alpha, \beta) \in \text{Vert}(\mathcal{A}) \times \text{Vert}(\mathcal{B})$  the sum increases by one if the condition of  
 1042 Eq. (45) is satisfied.

1043 Among these optimal pairs, some possess the intended semantics and therefore do not count as  
 1044 JRSs. By Lemma C.4, these correspond to all possible permutations of the concepts combined with  
 1045 all possible element-wise invertible transformations of the concept values.

1046 We begin by evaluating the number of possible element-wise invertible transformations. The  $i$ -th  
 1047 concept can attain  $|\mathcal{G}_i|$  values. The overall number of possible invertible transformations is then  
 1048 given by the number of possible permutations, resulting in a total of  $|\mathcal{G}_i|!$  maps. Hence, the number  
 1049 of element-wise invertible transformations is:

$$\prod_{i=1}^k |\mathcal{G}_i|! \quad (47)$$

1050 Next, we consider what permutation of the concepts are possible. To this end, consider the set and  
 1051 the multi-set comprising all different  $\mathcal{G}_i$  cardinalities given by:

$$s\mathcal{G} := \bigcup_{i=1}^k \{|\mathcal{G}_i|\}, \quad ms\mathcal{G} := \{(|\mathcal{G}_i|, m(|\mathcal{G}_i|)) : i \in [k]\} \quad (48)$$

1052 where  $m(\bullet)$  counts how many repetitions are present. When different  $\mathcal{G}_i$  and  $\mathcal{G}_j$  have the same  
 1053 cardinality, we can permute  $\mathcal{G}_i$  and  $\mathcal{G}_j$  without compromising optimality, as there always exists a  
 1054  $\beta$  that inverts the permutation and thus provides the same output. Thankfully, this shows in the  
 1055 multiplicity  $m(\cdot)$  and we can account for this. Therefore, for each element  $\xi \in s\mathcal{G}$  we have that the  
 1056 total number of permutations of concepts amount to:

$$\text{perm}(\mathcal{G}) := \prod_{\xi \in s\mathcal{G}} m(\xi)! \quad (49)$$

1057 Putting everything together, we obtain that the number of optimal pairs possessing the intended  
 1058 semantics is  $\text{perm}(\mathcal{G}) \times \prod_{i=1}^k |\mathcal{G}_i|!$ , meaning that the total number of deterministic JRSs is:

$$\sum_{(\alpha, \beta) \in \text{Vert}(\mathcal{A}) \times \text{Vert}(\mathcal{B})} \mathbb{I}\left\{ \bigwedge_{\mathbf{g} \in \text{supp}(p^*(\mathbf{G}))} (\beta \circ \alpha)(\mathbf{g}) = \beta^*(\mathbf{g}) \right\} - \text{perm}(\mathcal{G}) \times \prod_{i=1}^k |\mathcal{G}_i|! \quad (50)$$

1059 yielding the claim.  $\square$

1060 **Corollary 3.7.** Consider a fixed  $\beta^* \in \text{Vert}(\mathcal{B})$ . Under Assumptions 3.1 and 3.2, the number of  
 1061 deterministic JRSs  $(\alpha, \beta^*) \in \text{Vert}(\mathcal{A}) \times \text{Vert}(\mathcal{B})$  is:

$$\sum_{\alpha \in \text{Vert}(\mathcal{A})} \mathbb{I}\left\{ \bigwedge_{\mathbf{g} \in \text{supp}(\mathbf{G})} (\beta^* \circ \alpha)(\mathbf{g}) = \beta^*(\mathbf{g}) \right\} - 1 \quad (7)$$

1062 This matches the count for deterministic RSs in [17].

1063 *Proof.* The proof follows immediately by replacing  $\text{Vert}(\mathcal{B})$  with  $\{\beta^*\}$ , allowing only for the  
 1064 ground-truth inference function. In this context, by following similar steps of Theorem 3.6, we  
 1065 arrive at a similar count to Eq. (46), that is:

$$\sum_{(\alpha, \beta) \in \text{Vert}(\mathcal{A}) \times \{\beta^*\}} \mathbb{I}\left\{ \bigwedge_{\mathbf{g} \in \text{supp}(p^*(\mathbf{G}))} (\beta \circ \alpha)(\mathbf{g}) = \beta^*(\mathbf{g}) \right\} \quad (51)$$

1066 In the context of regular RSs, the only pair possessing the intended semantics is  $(\text{id}, \beta^*)$ , which has  
 1067 to be subtracted from Eq. (51). This proves the claim.  $\square$

### 1068 C.3 Proof of Theorem 3.9

1069 **Theorem 3.9 (Identifiability).** Under Assumptions 3.1 and 3.2, if the number of deterministic JRSs  
 1070 (Eq. (6)) is zero then every CBM  $(\mathbf{f}, \omega) \in \mathcal{F} \times \Omega$  satisfying Assumption 3.8 that attains maximum log-  
 1071 likelihood (Eq. (4)) possesses the intended semantics (Definition 3.3). That is, the pair  $(\alpha, \beta) \in \mathcal{A} \times$   
 1072  $\mathcal{B}$  entailed by each such CBM is equivalent to the ground-truth pair  $(\text{id}, \beta^*)$ , i.e.,  $(\alpha, \beta) \sim (\text{id}, \beta^*)$ .

1073 *Proof.* Consider a pair  $(\alpha, \beta) \in \mathcal{A} \times \mathcal{B}$ , where both  $\alpha$  and  $\beta$  can be non-deterministic conditional  
1074 probability distributions.

1075 **Step (i).** We begin by first recalling [Lemma C.1](#). Under [Assumptions 3.1](#) and [3.2](#), a CBM  $(\mathbf{f}, \omega) \in$   
1076  $\mathcal{F} \times \Omega$  is optimal, i.e., it attains maximum likelihood, if it holds that:

$$\forall \mathbf{g} \in \text{supp}(p^*(\mathbf{G})), \mathbb{E}_{\mathbf{x} \sim p^*(\mathbf{X}|\mathbf{g})}[(\omega \circ \mathbf{f})(\mathbf{x})] = \beta^*(\mathbf{g}) \quad (52)$$

1077 Notice that, according to [Assumptions 3.1](#) and [3.2](#), it also holds that the labels must be predicted  
1078 with probability one to attain maximum likelihood, that is:

$$\forall \mathbf{g} \in \mathcal{G}, \max \beta^*(\mathbf{g}) = 1 \quad (53)$$

1079 Now consider a pair  $(\alpha, \beta) \in \mathcal{A} \times \mathcal{B}$ . By [Lemma C.1](#) (i), it holds that to obtain maximum likelihood,  
1080 the learned knowledge  $\beta : \mathcal{C} \rightarrow \Delta_{\mathcal{Y}}$  must be deterministic:

$$\max \beta(\mathbf{c}) = 1 \quad (54)$$

1081 which implies that, necessarily, for  $\beta$  to be optimal the space  $\mathcal{B}$  restricts to the set  $\text{Vert}(\mathcal{B})$ , so  
1082 any learned knowledge  $\beta$  must belong to  $\text{Vert}(\mathcal{B})$ . This shows that optimal pairs  $(\alpha, \beta)$  belong to  
1083  $\mathcal{A} \times \text{Vert}(\mathcal{B})$ .

1084 **Step (ii).** Next, we make use of [Assumption 3.8](#) and consider only inference functions  $\omega$  that satisfy  
1085 it. We start by considering a pair  $(\mathbf{a}', \mathbf{b}') \in \text{Vert}(\mathcal{A}) \times \text{Vert}(\mathcal{B})$  that attain maximum likelihood, that  
1086 is, according to [Theorem 3.6](#):

$$\forall \mathbf{g} \in \text{supp}(p^*(\mathbf{G})), (\mathbf{b}' \circ \mathbf{a}')(\mathbf{g}) = \beta^*(\mathbf{g}) \quad (55)$$

1087 Now, given  $\mathbf{b}' \in \text{Vert}(\mathcal{B})$ , we have to prove that no non-deterministic  $\alpha \in \mathcal{A} \setminus \text{Vert}(\mathcal{A})$  can attain  
1088 maximum likelihood for any of the  $\omega' \in \Omega$  that correspond to  $\mathbf{b}'$ , that is, such that  $\omega'(\mathbb{1}\{\mathbf{C} = \mathbf{c}\}) =$   
1089  $\mathbf{b}'(\mathbf{c})$  for all  $\mathbf{c} \in \mathcal{C}$ . Since  $\mathcal{A}$  is a simplex, we can always construct a non-deterministic conditional  
1090 probability distribution  $\alpha \in \mathcal{A}$  from a convex combination of the vertices  $\mathbf{a}_i \in \text{Vert}(\mathcal{A})$ , i.e., for all  
1091  $\mathbf{g} \in \mathcal{G}$  it holds:

$$\alpha(\mathbf{g}) = \sum_{\alpha_i \in \text{Vert}(\mathcal{A})} \lambda_i \mathbf{a}_i(\mathbf{g}) \quad (56)$$

1092 Consider another  $\mathbf{a}'' \neq \mathbf{a}' \in \text{Vert}(\mathcal{A})$  and consider an arbitrary convex combination that defines a  
1093 non-deterministic  $\alpha \in \mathcal{A}$ :

$$\forall \mathbf{g} \in \mathcal{G}, \alpha(\mathbf{g}) := \lambda \mathbf{a}'(\mathbf{g}) + (1 - \lambda) \mathbf{a}''(\mathbf{g}) \quad (57)$$

1094 where  $\lambda \in (0, 1)$ . When the deterministic JRSs count ([Eq. \(6\)](#)) equals to zero, we know that by  
1095 [Theorem 3.6](#) only  $(\mathbf{a}', \mathbf{b}')$  attains maximum likelihood, whereas  $(\mathbf{a}'', \mathbf{b}')$  is not optimal. Therefore,  
1096 there exists at least one  $\hat{\mathbf{g}} \in \text{supp}(p^*(\mathbf{G}))$  such that

$$(\beta' \circ \mathbf{a}')(\hat{\mathbf{g}}) \neq (\beta' \circ \mathbf{a}'')(\hat{\mathbf{g}}) \quad (58)$$

1097 We now have to look at the form of  $\mathbf{f}$  that can induce such a non-deterministic  $\alpha = \lambda \mathbf{a}' + (1 - \lambda) \mathbf{a}''$ .  
1098 Recalling, the definition of  $\alpha$  ([Eq. \(2\)](#)) we have that:

$$\alpha(\mathbf{g}) = \mathbb{E}_{\mathbf{x} \sim p^*(\mathbf{X}|\mathbf{g})}[\mathbf{f}(\mathbf{x})] \quad (59)$$

$$= \lambda \mathbf{a}'(\mathbf{g}) + (1 - \lambda) \mathbf{a}''(\mathbf{g}) \quad (60)$$

1099 For this  $\alpha$ , there are two possible kinds of  $\mathbf{f} \in \mathcal{F}$  that can express it.

1100 (1) In one case, we can have  $\mathbf{f} : \mathbb{R}^n \rightarrow \text{Vert}(\Delta_{\mathcal{C}})$  – mapping inputs to “hard” distributions over  
1101 concepts. Since  $\alpha$  is not a “hard” distribution (provided  $\lambda \in (0, 1)$ ),  $\mathbf{f}(\mathbf{x})$  must be equal to  $\mathbf{a}'(\mathbf{g})$   
1102 for a fraction  $\lambda$  of the examples  $\mathbf{x} \in \text{supp}(p^*(\mathbf{X} | \mathbf{g}))$  and to  $\mathbf{a}''(\mathbf{g})$  for a fraction of  $1 - \lambda$ . In that  
1103 case, it holds that there exist a subspace of non-vanishing measure  $\mathcal{X}'' \subset \text{supp}(p^*(\mathbf{X} | \hat{\mathbf{g}}))$  such that  
1104  $\mathbf{f}(\mathbf{x}) = \mathbf{a}''(\hat{\mathbf{g}})$ . Therefore, for all  $\mathbf{x} \in \mathcal{X}''$  we have that  $(\mathbf{b}' \circ \mathbf{a}'')(\mathbf{x}) = (\omega \circ \mathbf{a}'')(\hat{\mathbf{g}}) \neq \beta^*(\hat{\mathbf{g}})$ , and  
1105 such an  $\mathbf{f}$  is suboptimal.

1106 (2) The remaining option is that  $\mathbf{f} : \mathbb{R}^n \rightarrow \Delta_{\mathcal{C}} \setminus \text{Vert}(\Delta_{\mathcal{C}})$ . In light of this, we rewrite  $\mathbf{f}$  as follows:

$$\forall \mathbf{x} \in \text{supp}(p^*(\mathbf{X} | \hat{\mathbf{g}})), \mathbf{f}(\mathbf{x}) = \sum_{\mathbf{c} \in \mathcal{C}} p(\mathbf{c} | \mathbf{x}) \mathbb{1}\{\mathbf{C} = \mathbf{c}\} \quad (61)$$

1107 where  $p(\mathbf{c} \mid \mathbf{x}) := \mathbf{f}(\mathbf{x})_{\mathbf{c}}$ . Let  $\hat{\mathbf{c}}' := \mathbf{a}'(\hat{\mathbf{g}})$  and  $\hat{\mathbf{c}}'' := \mathbf{a}''(\hat{\mathbf{g}})$ . But  $\alpha$  is a convex combination of  $\mathbf{a}'$   
 1108 and  $\mathbf{a}''$ , hence the function  $\mathbf{f}$  must attribute non-zero probability mass only to the concept vectors  $\hat{\mathbf{c}}'$   
 1109 and  $\hat{\mathbf{c}}''$ . Hence, we rewrite it as:

$$\forall \mathbf{x} \in \mathcal{X} \subseteq \text{supp}(p^*(\mathbf{X} \mid \hat{\mathbf{g}})), \mathbf{f}(\mathbf{x}) = p(\hat{\mathbf{c}}' \mid \mathbf{x}) \mathbb{I}\{\mathbf{C} = \hat{\mathbf{c}}'\} + p(\hat{\mathbf{c}}'' \mid \mathbf{x}) \mathbb{I}\{\mathbf{C} = \hat{\mathbf{c}}''\} \quad (62)$$

1110 where  $\mathcal{X}$  has measure one. Notice that in this case it holds  $\arg\max_{\mathbf{y} \in \mathcal{Y}} \mathbf{b}'(\hat{\mathbf{c}}')_{\mathbf{y}} \neq$   
 1111  $\arg\max_{\mathbf{y} \in \mathcal{Y}} \mathbf{b}'(\hat{\mathbf{c}}'')_{\mathbf{y}}$ . By [Assumption 3.8](#) we have that, for any choice of  $\lambda \in (0, 1)$  it holds that for  
 1112 all  $\mathbf{x} \in \mathcal{X}$ :

$$\begin{aligned} \max_{\mathbf{y} \in \mathcal{Y}} \omega(p(\hat{\mathbf{c}}' \mid \mathbf{x}) \mathbb{I}\{\mathbf{C} = \hat{\mathbf{c}}'\} + p(\hat{\mathbf{c}}'' \mid \mathbf{x}) \mathbb{I}\{\mathbf{C} = \hat{\mathbf{c}}''\}) &< \max_{\mathbf{y} \in \mathcal{Y}} \mathbf{b}'(\hat{\mathbf{c}}')_{\mathbf{y}}, \arg\max_{\mathbf{y} \in \mathcal{Y}} \mathbf{b}'(\hat{\mathbf{c}}'')_{\mathbf{y}} \\ &\text{(Using the condition from [Assumption 3.8](#))} \\ &= 1 \end{aligned} \quad (63)$$

1113 where the last step in [Eq. \(63\)](#) follows from the fact that  $\mathbf{b}' \in \text{Vert}(\mathcal{B})$ , so giving point-mass condi-  
 1114 tional probability distributions.

1115 (1) and (2) together show that any  $\alpha \in \mathcal{A} \setminus \text{Vert}(\mathcal{A})$  constructed as a convex combination of  $\mathbf{a}'$   
 1116 and an  $\mathbf{a}'' \neq \mathbf{a}'$  cannot attain maximum likelihood. Hence, the optimal pairs restrict to  $(\alpha, \beta) \in$   
 1117  $\text{Vert}(\mathcal{A}) \times \text{Vert}(\mathcal{B})$  and since the count of JRSs ([Eq. \(6\)](#)) is zero, all  $(\alpha, \beta) \in \mathcal{A} \times \mathcal{B}$  that are optimal  
 1118 also possess the intended semantics. This concludes the proof.  $\square$

## 1119 D Impact of mitigation strategies on the deterministic JRSs count

1120 We focus on how the count can be updated for some mitigation strategies that we accounted for in  
 1121 [Section 4](#). We consider those strategies that gives a constraint for the [Eq. \(6\)](#), namely: *multi-task*  
 1122 *learning*, *concept supervision*, *knowledge distillation*, and *reconstruction*.

### 1123 D.1 Multi-task learning

1124 In the following, we use  $\tau$  to indicate an additional learning task with corresponding. Suppose  
 1125 that for a subset  $\mathcal{G}^\tau \subseteq \text{supp}(p^*(\mathbf{G}))$ , input examples are complemented with additional labels  $\mathbf{y}^\tau$ ,  
 1126 obtained by applying an inference layer  $\beta_{\mathcal{K}^\tau}(\mathbf{g})$ . Here,  $\mathcal{K}^\tau$  is the conjunction of the prior knowledges  
 1127 for the original and additional task, and it yields a set  $\mathcal{Y}^\tau$  of additional labels when applied to the  
 1128 examples in  $\mathcal{G}^\tau$ . To understand how multi-task learning impacts the count of JRSs, we have to  
 1129 consider those  $\beta : \mathcal{C} \rightarrow \mathcal{Y} \times \mathcal{Y}^\tau$ , where a component  $\beta_{\mathcal{Y}}$  maps to the original task labels  $\mathcal{Y}$  and the  
 1130 other component  $\beta_{\mathcal{Y}^\tau}$  maps to the augmented labels  $\mathcal{Y}^\tau$ . Let  $\mathcal{B}^* := \mathcal{B} \times \mathcal{B}^\tau$  the space where such  
 1131 functions are defined. As obtained in [\[17\]](#), the constraint for a pair  $(\alpha, \beta) \in \text{Vert}(\mathcal{A}) \times \text{Vert}(\mathcal{B}^*)$   
 1132 can be written as:

$$\mathbb{I}\{\bigwedge_{\mathbf{g} \in \mathcal{G}^\tau} (\beta_{\mathcal{Y}^\tau} \circ \alpha)(\mathbf{g}) = \beta_{\mathcal{K}^\tau}(\mathbf{g})\} \quad (64)$$

1133 This term can be readily combined with the one appearing in [Theorem 3.6](#). Doing so, reduces the  
 1134 number of possible maps  $\alpha \in \text{Vert}(\mathcal{A})$  that successfully allow a function  $\beta \in \mathcal{B}^*$  to predict both  
 1135  $(\mathbf{y}, \mathbf{y}^\tau)$  consistently. Notice that, in the limit where the augmented knowledge comprehends enough  
 1136 additional labels and the support covers the whole, the only admitted solutions consist of:

$$(\beta_{\mathcal{Y}^\tau} \circ \text{id})(\mathbf{g}) = \underbrace{(\beta_{\mathcal{Y}^\tau} \circ \phi^{-1})}_{=: \beta_{\mathcal{Y}^\tau}} \circ \underbrace{\phi}_{=: \alpha}(\mathbf{g}) \quad (65)$$

1137 for all  $\mathbf{g} \in \mathcal{G}$ , where  $\phi : \mathcal{G} \rightarrow \mathcal{C}$  is an invertible function. This shows that  $\alpha$  can be only a bijection  
 1138 from  $\mathcal{G}$  to  $\mathcal{C}$ . Provided all the concept vectors  $\mathbf{g} \in \mathcal{G}$ , the number of such possible  $\alpha$ 's amounts to  
 1139 the number of possible permutation of the  $|\mathcal{G}|$  elements, that is  $|\mathcal{G}|!$ .

### 1140 D.2 Concept supervision

1141 The intuition is the same as in [\[17\]](#). Assume that we supply concept supervision for a subset of  
 1142 concepts  $\mathbf{G}_{\mathcal{I}} \subseteq \mathbf{G}$ , with  $\mathcal{I} \subseteq [k]$  and pair the regular log-likelihood objective over the labels with a  
 1143 log-likelihood over the concepts, i.e.,  $-\sum_{i \in \mathcal{I}} \log p_{\theta}(C_i = g_i \mid \mathbf{x})$ . Let  $\mathcal{G}^C \subseteq \text{supp}(p^*(\mathbf{G}))$  be the  
 1144 subset of values that receive supervision. The only deterministic  $\alpha$ 's that attain maximum likelihood  
 1145 on the concepts are those that match said supervision, i.e., that satisfy the constraint:

$$\mathbb{I}\{\bigwedge_{\mathbf{g} \in \mathcal{G}^C} \bigwedge_{i \in \mathcal{I}} \alpha_i(\mathbf{g}) = g_i\} \quad (66)$$

1146 This can be immediately used to obtain an updated (and smaller) JRS count. Note that if  $\mathcal{I} = [k]$   
 1147 and  $\mathcal{G}^C = \mathcal{G}$ , then the only suitable map is  $\alpha \equiv \text{id}$ . Naturally, this requires dense annotations for all  
 1148 possible inputs, which may be prohibitive.

### 1149 D.3 Knowledge distillation

1150 We consider the case where samples  $(\mathbf{g}, \beta^*(\mathbf{g}))$  are used to distill the ground-truth knowledge. Since  
 1151 by [Assumption 3.2](#) the ground-truth inference layer is deterministic, we consider the following ob-  
 1152 jective for distillation. Letting  $\mathcal{G}^K \subseteq \text{supp}(p^*(\mathbf{G}))$  be the subset of supervised values, we augment  
 1153 the original log-likelihood objective with the following log-likelihood term:

$$\sum_{\mathbf{g} \in \mathcal{G}^K} \log \omega(\mathbb{I}\{\mathbf{C} = \mathbf{g}\})_{\beta^*(\mathbf{g})} \quad (67)$$

1154 which penalizes the target CBM, for each  $\mathbf{g} \in \mathcal{G}^K$ , based on the  $\beta^*(\mathbf{g})$  component of  $\omega$ , i.e., the  
 1155 predicted probability of the ground-truth label. This can be rewritten as a constraint on  $\beta$  as follows:

$$\mathbb{I}\{\bigwedge_{\mathbf{g} \in \mathcal{G}^K} \beta(\mathbf{g}) = \beta^*(\mathbf{g})\} \quad (68)$$

1156 When  $\mathcal{G}^K = \mathcal{G}$  it necessarily holds that  $\beta \equiv \beta^*$ .

### 1157 D.4 Reconstruction penalty

1158 When focusing on reconstructing the input from the bottleneck, the probability distributions  $p(\mathbf{C} \mid$   
 1159  $\mathbf{X})$  may not carry enough information to completely determine the input  $\mathbf{X}$ . In fact, if  $\mathbf{X}$  depends  
 1160 also on stylistic variables  $\mathbf{S} \in \mathbb{R}^q$ , it becomes impossible to determine the input solely from  $\mathbf{G}$ . This  
 1161 means that training a decoder only passing  $\mathbf{c} \sim p(\mathbf{C} \mid \mathbf{X})$  would not convey enough information and  
 1162 would reduce the benefits of the reconstruction term. Marconato et al. [17] have studied this setting  
 1163 and proposed to also include additional variables  $\mathbf{Z} \in \mathbb{R}^q$  in the bottleneck to overcome this problem.  
 1164 The encoder/decoder architecture works as follows: first the input  $\mathbf{x}$  is encoded into  $p(\mathbf{C}, \mathbf{Z} \mid \mathbf{x})$  by  
 1165 the model and after sampling  $(\mathbf{c}, \mathbf{z}) \sim p(\mathbf{C}, \mathbf{Z} \mid \mathbf{x})$  the decoder  $\mathbf{d}$  reconstruct the an input image  
 1166  $\hat{\mathbf{x}} = \mathbf{d}(\mathbf{c}, \mathbf{z})$ . Following, under the assumption of *content-style separation*, i.e., both the encoder and  
 1167 the decoder process independently the concept and the stylistic variables, it holds that the constraint  
 1168 fr maps  $\alpha \in \text{Vert}(\mathcal{A})$  given by the reconstruction penalty result in:

$$\mathbb{I}\{\bigwedge_{\mathbf{g}, \mathbf{g}' \in \text{supp}(\mathbf{G}): \mathbf{g} \neq \mathbf{g}'} \alpha(\mathbf{g}) \neq \alpha(\mathbf{g}')\} \quad (69)$$

1169 The proof for this can be found in [17, Proposition 6]. Notice that, with full support over  $\mathcal{G}$ , the only  
 1170 such maps  $\alpha$  must not confuse one concept vector for another, i.e., at most there are at most  $|\mathcal{G}|!$   
 1171 different valid  $\alpha$ 's that are essentially a bijection from  $\mathcal{G}$  to  $\mathcal{C}$ .

## 1172 E Models that satisfy Assumption 3.8

### 1173 E.1 Theoretical analysis

1174 **Probabilistic Logic Models.** For models like DeepProbLog [40], the Semantic Loss [38], Semantic-  
 1175 Probabilistic Layers [43],  $\omega$  is defined as:

$$\omega(p(\mathbf{C})) := \sum_{\mathbf{c} \in \mathcal{C}} \beta(\mathbf{c}) p(\mathbf{C} = \mathbf{c}) \quad (70)$$

1176 Now, take  $\mathbf{c}, \mathbf{c}' \in \mathcal{C}$  such that:  $\beta(\mathbf{c}) \neq \beta(\mathbf{c}')$ . Then, for any  $\lambda \in (0, 1)$  it holds that:

$$\omega(\lambda \mathbb{I}\{\mathbf{C} = \mathbf{c}\} + (1 - \lambda) \mathbb{I}\{\mathbf{C} = \mathbf{c}'\}) = \lambda \beta(\mathbf{c}) + (1 - \lambda) \beta(\mathbf{c}') \quad (71)$$

$$\implies \max_{\mathbf{y} \in \mathcal{Y}} \omega(\lambda \mathbb{I}\{\mathbf{C} = \mathbf{c}\} + (1 - \lambda) \mathbb{I}\{\mathbf{C} = \mathbf{c}'\})_{\mathbf{y}} = \max_{\mathbf{y} \in \mathcal{Y}} (\lambda \beta(\mathbf{c})_{\mathbf{y}} + (1 - \lambda) \beta(\mathbf{c}')_{\mathbf{y}}) \quad (72)$$

1177 Notice that for all  $\mathbf{y} \in \mathcal{Y}$ , by the convexity of the max operator it holds that:

$$\max_{\mathbf{y} \in \mathcal{Y}} (\lambda \beta(\mathbf{c})_{\mathbf{y}} + (1 - \lambda) \beta(\mathbf{c}')_{\mathbf{y}}) \leq \quad (73)$$

$$\lambda \max_{\mathbf{y} \in \mathcal{Y}} (\max_{\mathbf{y} \in \mathcal{Y}} \beta(\mathbf{c})_{\mathbf{y}}, \max_{\mathbf{y} \in \mathcal{Y}} \beta(\mathbf{c}')_{\mathbf{y}}) + (1 - \lambda) \max_{\mathbf{y} \in \mathcal{Y}} (\max_{\mathbf{y} \in \mathcal{Y}} \beta(\mathbf{c})_{\mathbf{y}}, \max_{\mathbf{y} \in \mathcal{Y}} \beta(\mathbf{c}')_{\mathbf{y}}) \quad (74)$$

$$= \max_{\mathbf{y} \in \mathcal{Y}} (\max_{\mathbf{y} \in \mathcal{Y}} \beta(\mathbf{c})_{\mathbf{y}}, \max_{\mathbf{y} \in \mathcal{Y}} \beta(\mathbf{c}')_{\mathbf{y}}) \quad (75)$$

Equality holds if and only if  $\arg\max_{\mathbf{y} \in \mathcal{Y}} \beta(\mathbf{c})_{\mathbf{y}} = \arg\max_{\mathbf{y} \in \mathcal{Y}} \beta(\mathbf{c}')_{\mathbf{y}}$  and  $\max_{\mathbf{y} \in \mathcal{Y}} \beta(\mathbf{c})_{\mathbf{y}} = \max_{\mathbf{y} \in \mathcal{Y}} \beta(\mathbf{c}')_{\mathbf{y}}$ . This proves that probabilistic logic methods satisfy [Assumption 3.8](#).

**Deep Symbolic Learning** [49]. At inference time, DSL predicts a concept vector  $\mathbf{c} \in \mathcal{C}$  from a conditional probability concept distribution, that is, it implements a function  $\mathbf{f}_{DSL} : \mathbb{R}^n \rightarrow \mathcal{C}$  where:

$$\mathbf{f}_{DSL}(\mathbf{x}) := \arg\max_{\mathbf{c} \in \mathcal{C}} \tilde{p}(\mathbf{c} | \mathbf{x}) \quad (76)$$

and  $\tilde{p}(\mathbf{C} | \mathbf{X})$  is a learned conditional distribution on concepts. (Note that  $\mathbf{f}_{DSL}(\mathbf{X}) \neq \tilde{p}(\mathbf{C} | \mathbf{X})$ .) Hence,  $\alpha \in \mathcal{A}$  can be defined as:

$$\alpha(\mathbf{g}) := \mathbb{E}_{\mathbf{x} \sim p^*(\mathbf{x} | \mathbf{g})} [\mathbb{1}\{\mathbf{C} = \mathbf{f}_{DSL}(\mathbf{x})\}] \quad (77)$$

Notice that the learned  $\beta : \mathcal{G} \rightarrow \Delta_{\mathcal{Y}}$  consists in a look up table from concepts vectors  $\mathbf{c} \in \mathcal{C}$ , thereby giving the conditional distribution:

$$p_{DSL}(\mathbf{Y} | \mathbf{g}) := \mathbb{E}_{\mathbf{x} \sim p^*(\mathbf{x} | \mathbf{g})} [\beta(\mathbf{f}_{DSL}(\mathbf{x}))] \quad (78)$$

By considering the measure defined by  $p^*(\mathbf{x} | \mathbf{g})d\mathbf{x}$  and the transformation  $\mathbf{c} = \mathbf{f}_{DSL}(\mathbf{x})$ , we can pass to the new measure  $p(\mathbf{c} | \mathbf{g}) = \alpha(\mathbf{g})$  obtaining:

$$p_{DSL}(\mathbf{Y} | \mathbf{g}) = \sum_{\mathbf{c} \in \mathcal{C}} \beta(\mathbf{c}) p(\mathbf{c} | \mathbf{g}) \quad (79)$$

$$= \sum_{\mathbf{c} \in \mathcal{C}} \beta(\mathbf{c}) \alpha(\mathbf{g})_{\mathbf{c}} \quad (80)$$

$$= (\omega_{DSL} \circ \alpha)(\mathbf{g}) \quad (81)$$

where we used:

$$\omega_{DSL}(p(\mathbf{C})) := \sum_{\mathbf{c} \in \mathcal{C}} \beta(\mathbf{c}) p(\mathbf{C} = \mathbf{c}) \quad (82)$$

This form matches that of probabilistic logic methods in [Eq. \(70\)](#), hence [Assumption 3.8](#) similarly applies.

**Concept Bottleneck Models.** We consider CBNMs implementing a linear layer as  $\omega : \Delta_{\mathcal{C}} \rightarrow \Delta_{\mathcal{Y}}$ , as customary [2]. The linear layer consists of a matrix  $\mathbf{W} \in \mathbb{R}^{a \times b}$  with  $a := |\mathcal{G}|$  rows and  $b := |\mathcal{Y}|$  columns. In this setting, a probability distribution  $p(\mathbf{C}) \in \Delta_{\mathcal{C}}$  corresponds to the input vector passed to the inference layer  $\omega$ , implemented by the linear layer  $\mathbf{W}$  and a softmax operator. Notice that we can equivalently consider the tensor associated with the linear layer,  $\mathbf{w}_{\mathbf{c}}^{\mathbf{y}}$ , where lower-indices  $\mathbf{c} = (c_1, \dots, c_k)$  are the possible values of concepts and higher-indices  $\mathbf{y} = (y_1, \dots, y_{\ell})$  are the possible values of the labels. The scalar index  $c$  (resp.  $y$ ) runs over concept vectors  $\mathbf{c} \in \mathcal{C}$  (resp.  $\mathbf{y}$ ), e.g., for two dimensional binary concepts,  $c = 1$  corresponds to  $\mathbf{c} = (0, 1)^{\top} \in \{0, 1\}^2$  ( $\mathbf{W}_{1,:} = \mathbf{w}_{01}^{\mathbf{y}}$ ) and  $c = 2$  to  $\mathbf{c} = (1, 0)^{\top}$  ( $\mathbf{W}_{2,:} = \mathbf{w}_{10}^{\mathbf{y}}$ ). In the following, we make use of the tensor notation for simplicity of exposition.

Given a concept probability vector  $\mathbf{p} \in \Delta_{\mathcal{C}}$ , with components  $\mathbf{p}_{\mathbf{c}} = p(\mathbf{C} = \mathbf{c})$ , the conditional distribution over labels is given by the softmax operator:

$$p(\mathbf{y} | \mathbf{c}) = \omega(\mathbf{p})_{\mathbf{y}} = \frac{\exp(\sum_{\mathbf{c} \in \mathcal{C}} \mathbf{W}_{\mathbf{c},\mathbf{y}} \mathbf{p}_{\mathbf{c}})}{\sum_{\mathbf{y}' \in \mathcal{Y}} \exp(\sum_{\mathbf{c} \in \mathcal{C}} \mathbf{W}_{\mathbf{c},\mathbf{y}'} \mathbf{p}_{\mathbf{c}})} = \frac{\exp(\sum_{\mathbf{c} \in \mathcal{C}} \mathbf{w}_{\mathbf{c}}^{\mathbf{y}} \mathbf{p}_{\mathbf{c}})}{\sum_{\mathbf{y}' \in \mathcal{Y}} \exp(\sum_{\mathbf{c} \in \mathcal{C}} \mathbf{w}_{\mathbf{c}}^{\mathbf{y}'} \mathbf{p}_{\mathbf{c}})} \quad (83)$$

A CBNM may not satisfy [Assumption 3.8](#) for arbitrary choices of weights  $\mathbf{W}$ . Notice also that, since  $\omega$  includes a softmax operator, the  $\beta \in \text{Vert}(\mathcal{B})$  expressed by CBNMs *cannot* be deterministic.<sup>5</sup> This is a limitation for all CBNM. Specifically, in the context of [Assumption 3.2](#), it means that they cannot reach an optimum of maximum likelihood and therefore learn deterministic maps  $\beta^* \in \text{Vert}(\mathcal{B})$  ([Eq. \(8\)](#)).

To proceed, we focus on a special case: a near-optimal CBNM that can express an “almost deterministic” conditional distribution  $\beta \in \mathcal{B}$ , where a subset of weights  $\mathbf{w}_{\mathbf{c}}^{\mathbf{y}}$  is very high or very low. For this to happen, we need  $\beta$  to be peaked on concept vectors  $\mathbf{c} \in \mathcal{C}$ . This can happen only when the magnitude of one  $\mathbf{w}_{\mathbf{c}}^{\mathbf{y}}$  is much higher than other  $\mathbf{w}_{\mathbf{c}}^{\mathbf{y}'}$ . Hence, we formulate the following condition for CBNM:

<sup>5</sup>In fact, attributing near 1 probability to a label  $Y$  is only possible if the weights are extremely high in magnitude.



1214 **Definition E.1.** Consider a CBNM  $(\mathbf{f}, \omega) \in \mathcal{F} \times \Omega$  with weights  $\mathbf{W} = \{\mathbf{w}_c^y\}$  and let  $M > |\mathcal{Y} - 1|$ .  
 1215 We say that it is  $\log(M)$ -deterministic if, for all  $\mathbf{c} \in \mathcal{C}$ , there exists a  $\mathbf{y} \in \mathcal{Y}$  such that:

$$\forall \mathbf{y}' \neq \mathbf{y}, \mathbf{w}_c^y - \mathbf{w}_c^{y'} \geq \log M \quad (84)$$

$$\forall \mathbf{y}' \neq \mathbf{y}, \forall \mathbf{y}'' \neq \mathbf{y}, |\mathbf{w}_c^{y'} - \mathbf{w}_c^{y''}| \leq \log M \quad (85)$$

1216 This is helpful, as any  $\log(M)$ -deterministic CBNM can flexibly approximate deterministic  $\beta$ 's, as we  
 1217 show next:

1218 **Proposition E.2.** Consider a  $\log(M)$ -deterministic CBNM  $(\mathbf{f}, \omega) \in \mathcal{F} \times \Omega$ . We have:

$$\forall \mathbf{c} \in \mathcal{C}, \max_{\mathbf{y} \in \mathcal{Y}} \omega(\mathbf{c})_{\mathbf{y}} \geq \frac{1}{1 + (|\mathcal{Y}| - 1)/M} \quad (86)$$

1219 Also:

$$\forall \mathbf{c} \in \mathcal{C}, \lim_{M \rightarrow +\infty} \max_{\mathbf{y} \in \mathcal{Y}} \omega(\mathbf{c})_{\mathbf{y}} = 1 \quad (87)$$

1220 *Proof.* For  $\mathbf{c} \in \mathcal{C}$ , let  $\mathbf{y} = \operatorname{argmax}_{\mathbf{y}'} \omega(\mathbb{1}\{\mathbf{C} = \mathbf{c}\})_{\mathbf{y}'}$ . We consider the expression:

$$\omega(\mathbb{1}\{\mathbf{C} = \mathbf{c}\}) = \frac{\exp \mathbf{w}_c^y}{\sum_{\mathbf{y}' \in \mathcal{C}} \exp \mathbf{w}_c^{y'}} \quad (88)$$

$$= \frac{1}{1 + \sum_{\mathbf{y}' \neq \mathbf{y}} \exp(-\mathbf{w}_c^y + \mathbf{w}_c^{y'})} \quad (89)$$

1221 We now make use of the fact that the CBNM is  $\log(M)$ -deterministic and use [Eq. \(84\)](#) to obtain:

$$\frac{1}{1 + \sum_{\mathbf{y}' \neq \mathbf{y}} \exp(-(\mathbf{w}_c^y - \mathbf{w}_c^{y'}))} \geq \frac{1}{1 + \sum_{\mathbf{y}' \neq \mathbf{y}} \exp(-\log M)} \quad (90)$$

$$= \frac{1}{1 + \sum_{\mathbf{y}' \neq \mathbf{y}} \frac{1}{M}} \quad (91)$$

$$= \frac{1}{1 + (|\mathcal{Y} - 1|)/M} \quad (92)$$

1222 Putting everything together yields:

$$\max_{\mathbf{y} \in \mathcal{Y}} \omega(\mathbf{c})_{\mathbf{y}} \geq \frac{1}{1 + (|\mathcal{Y} - 1|)/M} \quad (93)$$

1223 Now, consider the limit for large  $M \in \mathbb{R}$ :

$$\lim_{M \rightarrow +\infty} \max_{\mathbf{y} \in \mathcal{Y}} \omega(\mathbf{c})_{\mathbf{y}} \geq \lim_{M \rightarrow +\infty} \frac{1}{1 + (|\mathcal{Y} - 1|)/M} = 1 \quad (94)$$

1224 This concludes the proof.  $\square$

1225 The last point of [Proposition E.2](#) shows a viable way to get peaked label distributions from a  $\log(M)$ -  
 1226 deterministic CBNM. Specifically, the limit guarantees that these CBNMs can approach an optimal  
 1227 likelihood. Now, we prove that a  $\log(M)$ -deterministic CBNM respects [Assumption 3.8](#).

1228 **Proposition E.3.** A CBNM  $(\mathbf{f}, \omega) \in \mathcal{F} \times \Omega$  that is  $\log(M)$ -deterministic ([Definition E.1](#)) satisfies  
 1229 [Assumption 3.8](#), i.e., for all  $\lambda \in (0, 1)$  and for all  $\mathbf{c} \neq \mathbf{c}'$  such that  $\operatorname{argmax}_{\mathbf{y} \in \mathcal{Y}} \omega(\mathbb{1}\{\mathbf{C} = \mathbf{c}\})_{\mathbf{y}} \neq$   
 1230  $\operatorname{argmax}_{\mathbf{y} \in \mathcal{Y}} \omega(\mathbb{1}\{\mathbf{C} = \mathbf{c}'\})_{\mathbf{y}}$ , it holds :

$$\max_{\mathbf{y} \in \mathcal{Y}} \omega(\lambda \mathbb{1}\{\mathbf{C} = \mathbf{c}_1\} + (1 - \lambda) \mathbb{1}\{\mathbf{C} = \mathbf{c}_2\})_{\mathbf{y}} < \max_{\mathbf{y} \in \mathcal{Y}} \omega(\mathbb{1}\{\mathbf{C} = \mathbf{c}_1\})_{\mathbf{y}}, \max_{\mathbf{y} \in \mathcal{Y}} \omega(\mathbb{1}\{\mathbf{C} = \mathbf{c}_2\})_{\mathbf{y}} \quad (95)$$

1231 *Proof.* Let  $\mathbf{y}_1 := \operatorname{argmax}_{\mathbf{y} \in \mathcal{Y}} \omega(\mathbb{1}\{\mathbf{C} = \mathbf{c}_1\})_{\mathbf{y}}$  and  $\mathbf{y}_2 := \operatorname{argmax}_{\mathbf{y} \in \mathcal{Y}} \omega(\mathbb{1}\{\mathbf{C} = \mathbf{c}_2\})_{\mathbf{y}}$  and  
 1232  $\lambda_1 := \lambda$  and  $\lambda_2 := 1 - \lambda$ , with  $\lambda \in (0, 1)$  and  $\mathbf{y}_1 \neq \mathbf{y}_2$ . The proof consists of two steps.

1233 First, we check that the values taken by  $\omega(\lambda \mathbb{I}\{\mathbf{C} = \mathbf{c}_1\} + (1 - \lambda) \mathbb{I}\{\mathbf{C} = \mathbf{c}_2\})_{y_i}$ , for  $i \in \{1, 2\}$ , are  
 1234 lower than those taken at the extremes. The explicit expression for  $\omega(\cdot)_{y_1}$  is given by:

$$\omega(\lambda_1 \mathbb{I}\{\mathbf{C} = \mathbf{c}_1\} + \lambda_2 \mathbb{I}\{\mathbf{C} = \mathbf{c}_2\})_{y_1} = \frac{e^{\lambda_1 \mathbf{w}_{c_1}^{y_1} + \lambda_2 \mathbf{w}_{c_2}^{y_1}}}{\sum_{y \in \mathcal{Y}} e^{\lambda_1 \mathbf{w}_{c_1}^y + \lambda_2 \mathbf{w}_{c_2}^y}} \quad (96)$$

1235 We differentiating over  $\lambda$ , leveraging the fact that  $\partial \lambda_1 / \partial \lambda = 1$  and  $\partial \lambda_2 / \partial \lambda = -1$ . Let  $Z(\lambda) :=$   
 1236  $\sum_{y \in \mathcal{Y}} \exp(\lambda_1 \mathbf{w}_{c_1}^y + \lambda_2 \mathbf{w}_{c_2}^y)$ . We first evaluate the derivative of this expression:

$$\frac{\partial Z(\lambda)}{\partial \lambda} = \sum_{y \in \mathcal{Y}} \frac{\partial}{\partial \lambda} e^{\lambda_1 \mathbf{w}_{c_1}^y + \lambda_2 \mathbf{w}_{c_2}^y} \quad (97)$$

$$= \sum_{y \in \mathcal{Y}} e^{\lambda_1 \mathbf{w}_{c_1}^y + \lambda_2 \mathbf{w}_{c_2}^y} (\partial_{\lambda} \lambda_1 \mathbf{w}_{c_1}^y + \partial_{\lambda} \lambda_2 \mathbf{w}_{c_2}^y) \quad (98)$$

$$= \sum_{y \in \mathcal{Y}} e^{\lambda_1 \mathbf{w}_{c_1}^y + \lambda_2 \mathbf{w}_{c_2}^y} (\mathbf{w}_{c_1}^y - \mathbf{w}_{c_2}^y) \quad (99)$$

$$= Z(\lambda) \sum_{y \in \mathcal{Y}} \frac{e^{\lambda_1 \mathbf{w}_{c_1}^y + \lambda_2 \mathbf{w}_{c_2}^y}}{Z(\lambda)} (\mathbf{w}_{c_1}^y - \mathbf{w}_{c_2}^y) \quad (100)$$

$$= Z(\lambda) \sum_{y \in \mathcal{Y}} (\mathbf{w}_{c_1}^y - \mathbf{w}_{c_2}^y) \omega(\lambda_1 \mathbb{I}\{\mathbf{C} = \mathbf{c}_1\} + \lambda_2 \mathbb{I}\{\mathbf{C} = \mathbf{c}_2\})_y \quad (101)$$

1237 This is legitimate as  $Z(\lambda) > 0$  by definition. Using this result we get:

$$\frac{\partial}{\partial \lambda} \frac{e^{\lambda_1 \mathbf{w}_{c_1}^{y_1} + \lambda_2 \mathbf{w}_{c_2}^{y_1}}}{Z(\lambda)} = \frac{\partial_{\lambda} e^{\lambda_1 \mathbf{w}_{c_1}^{y_1} + \lambda_2 \mathbf{w}_{c_2}^{y_1}} Z(\lambda) - e^{\lambda_1 \mathbf{w}_{c_1}^{y_1} + \lambda_2 \mathbf{w}_{c_2}^{y_1}} \partial_{\lambda} Z(\lambda)}{Z(\lambda)^2} \quad (102)$$

$$= \frac{e^{\lambda_1 \mathbf{w}_{c_1}^{y_1} + \lambda_2 \mathbf{w}_{c_2}^{y_1}} (\mathbf{w}_{c_1}^{y_1} - \mathbf{w}_{c_2}^{y_1}) Z(\lambda) - e^{\lambda_1 \mathbf{w}_{c_1}^{y_1} + \lambda_2 \mathbf{w}_{c_2}^{y_1}} Z(\lambda) \sum_{y \in \mathcal{Y}} (\mathbf{w}_{c_1}^y - \mathbf{w}_{c_2}^y) \omega(\lambda_1 \mathbb{I}\{\mathbf{C} = \mathbf{c}_1\} + \lambda_2 \mathbb{I}\{\mathbf{C} = \mathbf{c}_2\})_y}{Z(\lambda)^2} \quad (103)$$

$$= \frac{e^{\lambda_1 \mathbf{w}_{c_1}^{y_1} + \lambda_2 \mathbf{w}_{c_2}^{y_1}} (\mathbf{w}_{c_1}^{y_1} - \mathbf{w}_{c_2}^{y_1}) - e^{\lambda_1 \mathbf{w}_{c_1}^{y_1} + \lambda_2 \mathbf{w}_{c_2}^{y_1}} \sum_{y \in \mathcal{Y}} (\mathbf{w}_{c_1}^y - \mathbf{w}_{c_2}^y) \omega(\lambda_1 \mathbb{I}\{\mathbf{C} = \mathbf{c}_1\} + \lambda_2 \mathbb{I}\{\mathbf{C} = \mathbf{c}_2\})_y}{Z(\lambda)} \quad (104)$$

$$= \frac{e^{\lambda_1 \mathbf{w}_{c_1}^{y_1} + \lambda_2 \mathbf{w}_{c_2}^{y_1}} ((\mathbf{w}_{c_1}^{y_1} - \mathbf{w}_{c_2}^{y_1}) - \sum_{y \in \mathcal{Y}} (\mathbf{w}_{c_1}^y - \mathbf{w}_{c_2}^y) \omega(\lambda_1 \mathbb{I}\{\mathbf{C} = \mathbf{c}_1\} + \lambda_2 \mathbb{I}\{\mathbf{C} = \mathbf{c}_2\})_y)}{Z(\lambda)} \quad (105)$$

1238 Next, we analyze the sign of the derivative. Notice that we can focus only on the following term  
 1239 since the others are always positive:

$$(\mathbf{w}_{c_1}^{y_1} - \mathbf{w}_{c_2}^{y_1}) - \sum_{y \in \mathcal{Y}} (\mathbf{w}_{c_1}^y - \mathbf{w}_{c_2}^y) \omega(\lambda_1 \mathbb{I}\{\mathbf{C} = \mathbf{c}_1\} + \lambda_2 \mathbb{I}\{\mathbf{C} = \mathbf{c}_2\})_y \quad (106)$$

1240 From this expression, we can make use of the fact that in general, for a scalar function  $f(\mathbf{x})$ , we  
 1241 have  $\mathbb{E}_{\mathbf{X}}[f(\mathbf{X})] \leq \max_{\mathbf{x}} f(\mathbf{x})$  and consider the following:

$$(\mathbf{w}_{c_1}^{y_1} - \mathbf{w}_{c_2}^{y_1}) - \sum_{y \in \mathcal{Y}} (\mathbf{w}_{c_1}^y - \mathbf{w}_{c_2}^y) \omega(\lambda_1 \mathbb{I}\{\mathbf{C} = \mathbf{c}_1\} + \lambda_2 \mathbb{I}\{\mathbf{C} = \mathbf{c}_2\})_y \geq (\mathbf{w}_{c_1}^{y_1} - \mathbf{w}_{c_2}^{y_1}) - \max_{y \in \mathcal{Y}} (\mathbf{w}_{c_1}^y - \mathbf{w}_{c_2}^y) \quad (107)$$

$$= (\mathbf{w}_{c_1}^{y_1} - \mathbf{w}_{c_2}^{y_1}) - (\mathbf{w}_{c_1}^{y_1} - \mathbf{w}_{c_2}^{y_1}) \quad (108)$$

$$= 0 \quad (109)$$

1242 where in the second line we used that the maximum is given by  $y_1$ . Therefore, the derivative is  
 1243 always increasing in the  $[0, 1]$  interval, meaning that:

$$\forall \lambda \in [0, 1], \omega(\lambda_1 \mathbb{I}\{\mathbf{C} = \mathbf{c}_1\} + \lambda_2 \mathbb{I}\{\mathbf{C} = \mathbf{c}_2\})_{y_1} \leq \omega(\mathbb{I}\{\mathbf{C} = \mathbf{c}_1\})_{y_1} \quad (110)$$

1244 where the equality holds if and only if  $\lambda = 1$ . Similarly, the derivative for  $\omega(\cdot)_{\mathbf{y}_2}$  gives:

$$\begin{aligned} & \frac{\partial \omega(\lambda_1 \mathbb{I}\{\mathbf{C} = \mathbf{c}_1\} + \lambda_2 \mathbb{I}\{\mathbf{C} = \mathbf{c}_2\})_{\mathbf{y}_2}}{\partial \lambda} \\ &= \frac{e^{\lambda_1 \mathbf{w}_{\mathbf{c}_1}^{\mathbf{y}_2} + \lambda_2 \mathbf{w}_{\mathbf{c}_2}^{\mathbf{y}_2}} ((\mathbf{w}_{\mathbf{c}_1}^{\mathbf{y}_2} - \mathbf{w}_{\mathbf{c}_2}^{\mathbf{y}_2}) - \sum_{\mathbf{y} \in \mathcal{Y}} (\mathbf{w}_{\mathbf{c}_1}^{\mathbf{y}} - \mathbf{w}_{\mathbf{c}_2}^{\mathbf{y}}) \omega(\lambda_1 \mathbb{I}\{\mathbf{C} = \mathbf{c}_1\} + \lambda_2 \mathbb{I}\{\mathbf{C} = \mathbf{c}_2\})_{\mathbf{y}})}{Z(\lambda)} \end{aligned} \quad (111)$$

1245 By using the fact that  $\mathbb{E}_{\mathbf{X}}[f(\mathbf{X})] \geq \min_{\mathbf{x}} f(\mathbf{x})$  for a scalar function  $f(\mathbf{x})$ , we obtain:

$$(\mathbf{w}_{\mathbf{c}_1}^{\mathbf{y}_2} - \mathbf{w}_{\mathbf{c}_2}^{\mathbf{y}_2}) - \sum_{\mathbf{y} \in \mathcal{Y}} (\mathbf{w}_{\mathbf{c}_1}^{\mathbf{y}} - \mathbf{w}_{\mathbf{c}_2}^{\mathbf{y}}) \omega(\lambda_1 \mathbb{I}\{\mathbf{C} = \mathbf{c}_1\} + \lambda_2 \mathbb{I}\{\mathbf{C} = \mathbf{c}_2\})_{\mathbf{y}} \leq (\mathbf{w}_{\mathbf{c}_1}^{\mathbf{y}_2} - \mathbf{w}_{\mathbf{c}_2}^{\mathbf{y}_2}) - \min_{\mathbf{y} \in \mathcal{Y}} (\mathbf{w}_{\mathbf{c}_1}^{\mathbf{y}} - \mathbf{w}_{\mathbf{c}_2}^{\mathbf{y}}) \quad (112)$$

$$= (\mathbf{w}_{\mathbf{c}_1}^{\mathbf{y}_2} - \mathbf{w}_{\mathbf{c}_2}^{\mathbf{y}_2}) - (\mathbf{w}_{\mathbf{c}_1}^{\mathbf{y}_2} - \mathbf{w}_{\mathbf{c}_2}^{\mathbf{y}_2}) \quad (113)$$

$$= 0 \quad (114)$$

1246 where in the second line we used that the minimum is given by  $\mathbf{y}_2$ . Hence, the derivative is always  
1247 decreasing for  $\lambda \in [0, 1]$  and it holds:

$$\forall \lambda \in [0, 1], \quad \omega(\lambda_1 \mathbb{I}\{\mathbf{C} = \mathbf{c}_1\} + \lambda_2 \mathbb{I}\{\mathbf{C} = \mathbf{c}_2\})_{\mathbf{y}_2} \leq \omega(\mathbb{I}\{\mathbf{C} = \mathbf{c}_2\})_{\mathbf{y}_2} \quad (115)$$

1248 where the equality holds if and only if  $\lambda = 0$ .

1249 (2) Now, we check the same holds when choosing another element  $\mathbf{y}' \neq \mathbf{y}_1, \mathbf{y}_2$ . To this end, we  
1250 consider the following expressions:

$$\frac{p(\mathbf{y} \mid \lambda_1 \mathbb{I}\{\mathbf{C} = \mathbf{c}_1\} + \lambda_2 \mathbb{I}\{\mathbf{C} = \mathbf{c}_2\})}{p(\mathbf{y}_1 \mid \mathbf{c}_1)}, \quad \frac{p(\mathbf{y} \mid \lambda_1 \mathbb{I}\{\mathbf{C} = \mathbf{c}_1\} + \lambda_2 \mathbb{I}\{\mathbf{C} = \mathbf{c}_2\})}{p(\mathbf{y}_2 \mid \mathbf{c}_2)} \quad (116)$$

1251 where  $p(\mathbf{y} \mid \mathbf{p}) := \omega(\mathbf{p})_{\mathbf{y}}$ . Consider the first expression. We can rewrite it as follows:

$$\frac{p(\mathbf{y} \mid \lambda_1 \mathbb{I}\{\mathbf{C} = \mathbf{c}_1\} + \lambda_2 \mathbb{I}\{\mathbf{C} = \mathbf{c}_2\})}{p(\mathbf{y}_1 \mid \mathbf{c}_1)} \quad (117)$$

$$= \frac{p(\mathbf{y} \mid \lambda_1 \mathbb{I}\{\mathbf{C} = \mathbf{c}_1\} + \lambda_2 \mathbb{I}\{\mathbf{C} = \mathbf{c}_2\})}{p(\mathbf{y}_1 \mid \lambda_1 \mathbb{I}\{\mathbf{C} = \mathbf{c}_1\} + \lambda_2 \mathbb{I}\{\mathbf{C} = \mathbf{c}_2\})} \frac{p(\mathbf{y}_1 \mid \lambda_1 \mathbb{I}\{\mathbf{C} = \mathbf{c}_1\} + \lambda_2 \mathbb{I}\{\mathbf{C} = \mathbf{c}_2\})}{p(\mathbf{y}_1 \mid \mathbf{c}_1)} \quad (118)$$

$$\leq \frac{p(\mathbf{y} \mid \lambda_1 \mathbb{I}\{\mathbf{C} = \mathbf{c}_1\} + \lambda_2 \mathbb{I}\{\mathbf{C} = \mathbf{c}_2\})}{p(\mathbf{y}_1 \mid \lambda_1 \mathbb{I}\{\mathbf{C} = \mathbf{c}_1\} + \lambda_2 \mathbb{I}\{\mathbf{C} = \mathbf{c}_2\})} \quad (119)$$

1252 where in the last line we made use of the fact that the second fraction in the right-hand side of the  
1253 first line is always  $\leq 1$ . Similarly we have that:

$$\frac{p(\mathbf{y} \mid \lambda_1 \mathbb{I}\{\mathbf{C} = \mathbf{c}_1\} + \lambda_2 \mathbb{I}\{\mathbf{C} = \mathbf{c}_2\})}{p(\mathbf{y}_2 \mid \mathbf{c}_2)} \leq \frac{p(\mathbf{y} \mid \lambda_1 \mathbb{I}\{\mathbf{C} = \mathbf{c}_1\} + \lambda_2 \mathbb{I}\{\mathbf{C} = \mathbf{c}_2\})}{p(\mathbf{y}_2 \mid \lambda_1 \mathbb{I}\{\mathbf{C} = \mathbf{c}_1\} + \lambda_2 \mathbb{I}\{\mathbf{C} = \mathbf{c}_2\})} \quad (120)$$

1254 We proceed to substituting explicitly the expression for  $p(\mathbf{y} \mid \lambda_1 \mathbb{I}\{\mathbf{C} = \mathbf{c}_1\} + \lambda_2 \mathbb{I}\{\mathbf{C} = \mathbf{c}_1\})$  into  
1255 the upper bound of Eq. (119):

$$\frac{p(\mathbf{y} \mid \lambda_1 \mathbb{I}\{\mathbf{C} = \mathbf{c}_1\} + \lambda_2 \mathbb{I}\{\mathbf{C} = \mathbf{c}_2\})}{p(\mathbf{y}_1 \mid \lambda_1 \mathbb{I}\{\mathbf{C} = \mathbf{c}_1\} + \lambda_2 \mathbb{I}\{\mathbf{C} = \mathbf{c}_2\})} = \frac{e^{\lambda_1 \mathbf{w}_{\mathbf{c}_1}^{\mathbf{y}} + \lambda_2 \mathbf{w}_{\mathbf{c}_2}^{\mathbf{y}}} Z(\lambda)}{e^{\lambda_1 \mathbf{w}_{\mathbf{c}_1}^{\mathbf{y}_1} + \lambda_2 \mathbf{w}_{\mathbf{c}_2}^{\mathbf{y}_1}}} Z(\lambda) \quad (121)$$

$$= \exp(\lambda_1 (\mathbf{w}_{\mathbf{c}_1}^{\mathbf{y}} - \mathbf{w}_{\mathbf{c}_1}^{\mathbf{y}_1}) + \lambda_2 (\mathbf{w}_{\mathbf{c}_2}^{\mathbf{y}} - \mathbf{w}_{\mathbf{c}_2}^{\mathbf{y}_1})) \quad (122)$$

$$\leq \exp(-\lambda_1 \log(M) + \lambda_2 (\mathbf{w}_{\mathbf{c}_2}^{\mathbf{y}} - \mathbf{w}_{\mathbf{c}_2}^{\mathbf{y}_1})) \quad (\text{Substituting the bound from Eq. (84)})$$

$$\leq \exp(-\lambda_1 \log(M) + \lambda_2 \log(M)) \quad (\text{Substituting the bound from Eq. (85)})$$

$$= M^{\lambda_2 - \lambda_1} \quad (123)$$

1256 With similar steps and substitutions we get that:

$$\frac{p(\mathbf{y} \mid \lambda_1 \mathbb{I}\{\mathbf{C} = \mathbf{c}_1\} + \lambda_2 \mathbb{I}\{\mathbf{C} = \mathbf{c}_2\})}{p(\mathbf{y}_2 \mid \lambda_1 \mathbb{I}\{\mathbf{C} = \mathbf{c}_1\} + \lambda_2 \mathbb{I}\{\mathbf{C} = \mathbf{c}_2\})} \leq M^{\lambda_1 - \lambda_2} \quad (124)$$

1257 Taking the product of Eq. (123) and Eq. (124) we obtain:

$$\frac{p(\mathbf{y} \mid \lambda_1 \mathbb{I}\{\mathbf{C} = \mathbf{c}_1\} + \lambda_2 \mathbb{I}\{\mathbf{C} = \mathbf{c}_2\})}{p(\mathbf{y}_1 \mid \lambda_1 \mathbb{I}\{\mathbf{C} = \mathbf{c}_1\} + \lambda_2 \mathbb{I}\{\mathbf{C} = \mathbf{c}_2\})} \cdot \frac{p(\mathbf{y} \mid \lambda_1 \mathbb{I}\{\mathbf{C} = \mathbf{c}_1\} + \lambda_2 \mathbb{I}\{\mathbf{C} = \mathbf{c}_2\})}{p(\mathbf{y}_2 \mid \lambda_1 \mathbb{I}\{\mathbf{C} = \mathbf{c}_1\} + \lambda_2 \mathbb{I}\{\mathbf{C} = \mathbf{c}_2\})} \leq M^{\lambda_2 - \lambda_1} M^{\lambda_1 - \lambda_2} \quad (125)$$

$$= 1 \quad (126)$$

1258 Notice also that:

$$\begin{aligned} & \frac{p(\mathbf{y} \mid \lambda_1 \mathbb{I}\{\mathbf{C} = \mathbf{c}_1\} + \lambda_2 \mathbb{I}\{\mathbf{C} = \mathbf{c}_2\})}{p(\mathbf{y}_1 \mid \lambda_1 \mathbb{I}\{\mathbf{C} = \mathbf{c}_1\} + \lambda_2 \mathbb{I}\{\mathbf{C} = \mathbf{c}_2\})} \cdot \frac{p(\mathbf{y} \mid \lambda_1 \mathbb{I}\{\mathbf{C} = \mathbf{c}_1\} + \lambda_2 \mathbb{I}\{\mathbf{C} = \mathbf{c}_2\})}{p(\mathbf{y}_2 \mid \lambda_1 \mathbb{I}\{\mathbf{C} = \mathbf{c}_1\} + \lambda_2 \mathbb{I}\{\mathbf{C} = \mathbf{c}_2\})} \\ & \geq \min \left( \frac{p(\mathbf{y} \mid \lambda_1 \mathbb{I}\{\mathbf{C} = \mathbf{c}_1\} + \lambda_2 \mathbb{I}\{\mathbf{C} = \mathbf{c}_2\})^2}{p(\mathbf{y}_1 \mid \lambda_1 \mathbb{I}\{\mathbf{C} = \mathbf{c}_1\} + \lambda_2 \mathbb{I}\{\mathbf{C} = \mathbf{c}_2\})^2}, \frac{p(\mathbf{y} \mid \lambda_1 \mathbb{I}\{\mathbf{C} = \mathbf{c}_1\} + \lambda_2 \mathbb{I}\{\mathbf{C} = \mathbf{c}_2\})^2}{p(\mathbf{y}_2 \mid \lambda_1 \mathbb{I}\{\mathbf{C} = \mathbf{c}_1\} + \lambda_2 \mathbb{I}\{\mathbf{C} = \mathbf{c}_2\})^2} \right) \end{aligned} \quad (127)$$

1259 which in turn means that:

$$\min \left( \frac{p(\mathbf{y} \mid \lambda_1 \mathbb{I}\{\mathbf{C} = \mathbf{c}_1\} + \lambda_2 \mathbb{I}\{\mathbf{C} = \mathbf{c}_2\})^2}{p(\mathbf{y}_1 \mid \lambda_1 \mathbb{I}\{\mathbf{C} = \mathbf{c}_1\} + \lambda_2 \mathbb{I}\{\mathbf{C} = \mathbf{c}_2\})^2}, \frac{p(\mathbf{y} \mid \lambda_1 \mathbb{I}\{\mathbf{C} = \mathbf{c}_1\} + \lambda_2 \mathbb{I}\{\mathbf{C} = \mathbf{c}_2\})^2}{p(\mathbf{y}_2 \mid \lambda_1 \mathbb{I}\{\mathbf{C} = \mathbf{c}_1\} + \lambda_2 \mathbb{I}\{\mathbf{C} = \mathbf{c}_2\})^2} \right) \leq 1 \quad (128)$$

$$\implies \min \left( \frac{p(\mathbf{y} \mid \lambda_1 \mathbb{I}\{\mathbf{C} = \mathbf{c}_1\} + \lambda_2 \mathbb{I}\{\mathbf{C} = \mathbf{c}_2\})}{p(\mathbf{y}_1 \mid \lambda_1 \mathbb{I}\{\mathbf{C} = \mathbf{c}_1\} + \lambda_2 \mathbb{I}\{\mathbf{C} = \mathbf{c}_2\})}, \frac{p(\mathbf{y} \mid \lambda_1 \mathbb{I}\{\mathbf{C} = \mathbf{c}_1\} + \lambda_2 \mathbb{I}\{\mathbf{C} = \mathbf{c}_2\})}{p(\mathbf{y}_2 \mid \lambda_1 \mathbb{I}\{\mathbf{C} = \mathbf{c}_1\} + \lambda_2 \mathbb{I}\{\mathbf{C} = \mathbf{c}_2\})} \right) \leq 1 \quad (129)$$

1260 This last expression is in line with the condition of [Assumption 3.8](#), showing that, for all  $\mathbf{y} \in \mathcal{Y}$ ,  
 1261 either  $\omega(\mathbb{I}\{\mathbf{C} = \mathbf{c}_1\})_{\mathbf{y}_1}$  or  $\omega(\mathbb{I}\{\mathbf{C} = \mathbf{c}_2\})_{\mathbf{y}_2}$  are greater or equal to  $\omega(\lambda \mathbb{I}\{\mathbf{C} = \mathbf{c}_1\} + (1 - \lambda) \mathbb{I}\{\mathbf{C} = \mathbf{c}_2\})_{\mathbf{y}}$ .  
 1262 Combining step (1) and (2), we obtain that [Assumption 3.8](#) holds and that:

$$\max_{\mathbf{y} \in \mathcal{Y}} \omega(\lambda \mathbb{I}\{\mathbf{C} = \mathbf{c}_1\} + (1 - \lambda) \mathbb{I}\{\mathbf{C} = \mathbf{c}_2\})_{\mathbf{y}} \leq \max_{\mathbf{y} \in \mathcal{Y}} \omega(\mathbb{I}\{\mathbf{C} = \mathbf{c}_1\})_{\mathbf{y}}, \max_{\mathbf{y} \in \mathcal{Y}} \omega(\mathbb{I}\{\mathbf{C} = \mathbf{c}_2\})_{\mathbf{y}} \quad (130)$$

1263 where equality holds if and only if  $\lambda \in \{0, 1\}$ .  $\square$

## 1264 E.2 Numerical evaluation of Assumption 3.8

1265 Finally, we investigate experimentally whether the models used in our experiments satisfy [Assump-](#)  
 1266 [tion 3.8](#). We have already shown in [Appendix E.1](#) that the DSL inference layer reduces to Probabilistic  
 1267 Logic methods and, therefore, we only consider DPL and DPL\* as representatives, and our  
 1268 empirical results support this claim. We evaluate CBNMs separately. In this evaluation, train models  
 1269 on MNIST-Add, where there are two concepts  $\mathbf{c} = (c_1, c_2) \in [10]^2$  and 19 total labels  $y \in [19]$ . This  
 1270 yields a total of  $100 \times 19$  weights for the inference layer  $\omega$ , which are fixed (by the prior knowledge)  
 1271 for DPL and learned from data for DPL\* and CBNM.

1272 We begin from DPL, where the prior knowledge  $K$  defines the inference layer  $\omega^*$ . In this case, we  
 1273 find that – as expected – [Assumption 3.8](#) is satisfied by all possible pairs  $(\mathbf{c}_1, \mathbf{c}_2) \in [10]^2 \times [10]^2$   
 1274 that predict distinct labels (as requested by the assumption), see [Fig. 10](#).

1275 We now turn to DPL\*. Due to the linearity of the inference layer, in order to study the learned  
 1276 inference layer  $\omega$  it suffices to consider random weights for  $\omega$ , cf. [Eq. \(71\)](#). Also in this case, we  
 1277 find that for all possible pairs  $(\mathbf{c}_1, \mathbf{c}_2) \in [10]^2 \times [10]^2$  that predict distinct labels, [Assumption 3.8](#) is  
 1278 satisfied. See [Fig. 11](#).

1279 Finally, we evaluate whether a CBNM trained on MNIST-Add and that is close to achieving optimal  
 1280 likelihood satisfies, at least approximately, [Assumption 3.8](#). To this end, we train the CBNM for 150  
 1281 epochs, reaching a mean negative log-likelihood of 0.0884 on the test set. We find that [Assump-](#)  
 1282 [tion 3.8](#) is satisfied for the 95% of possible pairs  $(\mathbf{c}_1, \mathbf{c}_2) \in [10]^2 \times [10]^2$  giving different labels. For  
 1283 the remaining 5% the assumption is *marginally* violated with a maximum discrepancy:

$$\max_{\mathbf{c}_1, \mathbf{c}_2, \lambda} \left( \max_{\mathbf{y}} \omega(\lambda \mathbb{I}\{\mathbf{C} = \mathbf{c}_i\} + (1 - \lambda) \mathbb{I}\{\mathbf{C} = \mathbf{c}_j\})_{\mathbf{y}} - \max_{\mathbf{y}} (\max_{\mathbf{y}} \omega(\mathbb{I}\{\mathbf{C} = \mathbf{c}_1\})_{\mathbf{y}}, \max_{\mathbf{y}} \omega(\mathbb{I}\{\mathbf{C} = \mathbf{c}_2\})_{\mathbf{y}}) \right) \quad (131)$$

$$\leq 1.38 \cdot 10^{-3} \quad (132)$$

1284 The results are illustrated in [Fig. 12](#).

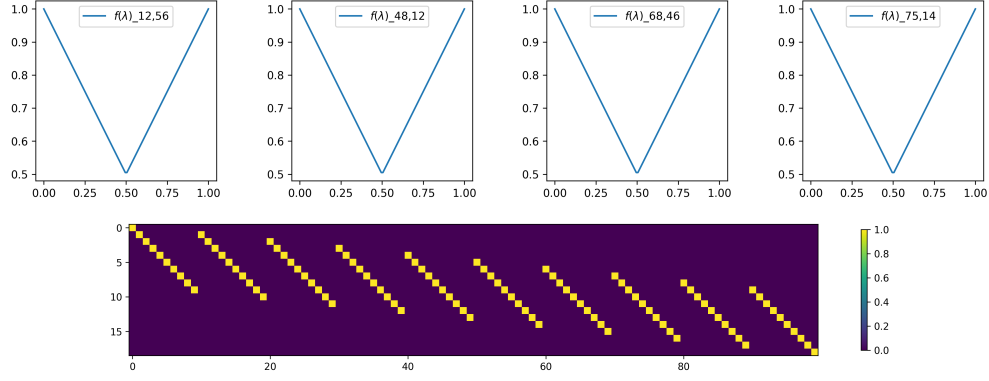

Figure 10: **The logic inference layer of DPL in MNIST-Add.** (Top) The behavior of  $f(\lambda) := \max_{\mathbf{y}} \omega(\lambda \mathbb{I}\{\mathbf{C} = \mathbf{c}_i\} + (1 - \lambda) \mathbb{I}\{\mathbf{C} = \mathbf{c}_j\})$ , for four pairs  $i, j$  sampled randomly from the 100 possible worlds. The x-axis represents  $\lambda$  and the y-axis  $f(\lambda)$ . (Bottom) The linear layer weights for DPL.

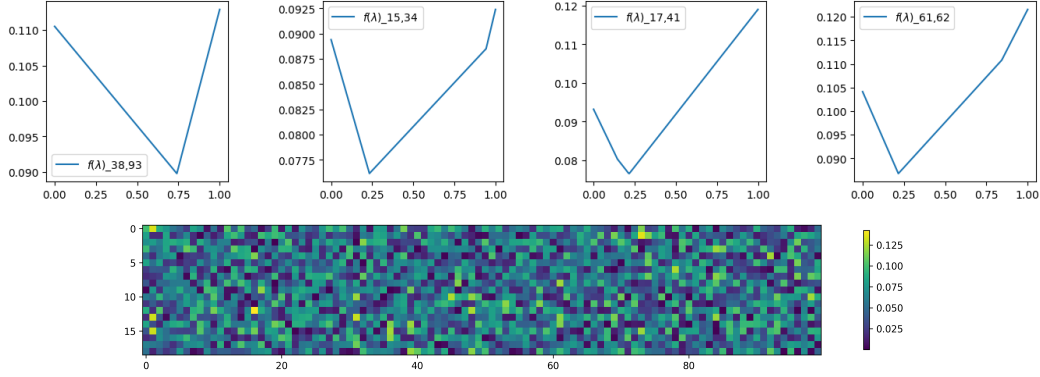

Figure 11: **A random inference layer for DPL\* in MNIST-Add.** (Top) The behavior of  $f(\lambda) := \max_{\mathbf{y}} \omega(\lambda \mathbb{I}\{\mathbf{C} = \mathbf{c}_i\} + (1 - \lambda) \mathbb{I}\{\mathbf{C} = \mathbf{c}_j\})$ , for four pairs  $i, j$  sampled randomly from the 100 possible worlds. (Bottom) The linear layer weights for DPL\*.

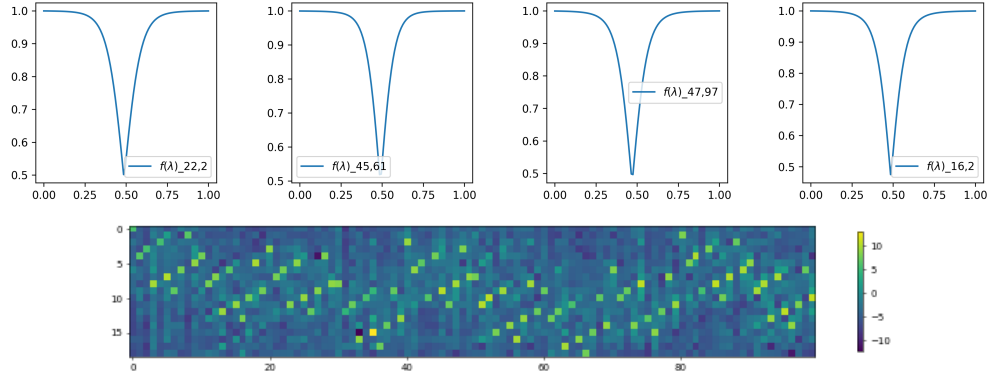

Figure 12: **Optimal CBNM in MNIST-Add.** We visualize the learned weights by a CBNM achieving maximum log-likelihood in MNIST-Add. (Top) The behavior of  $f(\lambda) := \max_{\mathbf{y}} \omega(\lambda \mathbb{I}\{\mathbf{C} = \mathbf{c}_i\} + (1 - \lambda) \mathbb{I}\{\mathbf{C} = \mathbf{c}_j\})$ , for four pairs  $i, j$  sampled randomly the 100 possible worlds. The sampled pairs align with [Assumption 3.8](#). (Bottom) The linear layer weights for the trained CBNM.
